# Supplementary material for: Comparison of LIRADS 5 Image Guided Core Biopsy Derived From Formalin Fixed and Frozen Tissue Cores for Radiogenomics and Radioproteomics Analysis in Well, Moderate and Poorly Differentiated Hepatocellular Carcinoma
Source: Glob Med Ther. Author manuscript; Available in PMC 2024 May 30. (PMC11138132)
Supplement: Supplementary [file NIHMS1993755-supplement-Supplementary.xlsx]

## Sheet: Supp 1
		moderate		poor	well		well
Gene-ID	Gene-Name	30	30f	68	79	79f	82	82f			(f= FFPE)
ENSG00000186205	44986	272	564	1314	39	670	557	631
ENSG00000117791	44987	1063	1465	4090	22	1304	1666	1276
ENSG00000173077	45261	48	70	8	0	8	1	0
ENSG00000121410	A1BG	85	221	119	0	69	52	95
ENSG00000268895	A1BG-AS1	25	71	18	1	66	27	58
ENSG00000148584	A1CF	10779	9697	17763	396	8284	9041	6393
ENSG00000175899	A2M	139392	63011	16890	3815	79868	27874	29852
ENSG00000245105	A2M-AS1	60	99	110	0	408	40	86
ENSG00000166535	A2ML1	0	0	0	0	0	0	0
ENSG00000256661	A2ML1-AS1	0	0	0	0	2	0	0
ENSG00000256904	A2ML1-AS2	0	1	0	0	0	3	1
ENSG00000256069	A2MP1	1	8	3	0	17	6	8
ENSG00000184389	A3GALT2	0	12	1	0	0	3	2
ENSG00000128274	A4GALT	31	82	27	0	31	130	67
ENSG00000118017	A4GNT	2	6	5	0	7	0	1
ENSG00000094914	AAAS	420	492	476	30	338	430	375
ENSG00000081760	AACS	220	267	128	0	237	96	189
ENSG00000250420	AACSP1	0	0	0	0	0	0	0
ENSG00000114771	AADAC	3229	769	2297	63	3253	1482	432
ENSG00000197953	AADACL2	0	0	0	0	0	0	0
ENSG00000242908	AADACL2-AS1	1	0	1	0	1	6	2
ENSG00000188984	AADACL3	0	0	0	0	0	0	0
ENSG00000204518	AADACL4	0	0	1	0	0	1	2
ENSG00000240602	AADACP1	110	131	68	0	327	412	202
ENSG00000109576	AADAT	270	339	841	0	256	507	306
ENSG00000103591	AAGAB	360	253	194	17	431	385	264
ENSG00000115977	AAK1	1498	2350	1023	115	2504	2114	2095
ENSG00000087884	AAMDC	80	53	90	0	112	59	37
ENSG00000127837	AAMP	771	527	754	55	410	1241	442
ENSG00000129673	AANAT	0	0	0	0	0	1	0
ENSG00000131043	AAR2	399	434	254	49	291	516	302
ENSG00000205002	AARD	0	0	0	0	0	0	0
ENSG00000090861	AARS1	2182	1498	1426	63	1270	1794	1106
ENSG00000249038	AARS1P1	0	0	0	0	0	0	0
ENSG00000124608	AARS2	328	450	328	0	255	326	333
ENSG00000266967	AARSD1	23	62	22	1	52	17	51
ENSG00000157426	AASDH	275	319	271	0	382	254	235
ENSG00000149313	AASDHPPT	519	272	378	17	533	417	178
ENSG00000008311	AASS	2955	3508	5249	75	2353	10300	9390
ENSG00000215458	AATBC	12	42	9	0	18	14	7
ENSG00000275700	AATF	599	577	451	1	468	607	434
ENSG00000181409	AATK	49	142	40	0	33	24	46
ENSG00000281376	ABALON	6	9	3	0	3	6	4
ENSG00000183044	ABAT	12125	8422	9477	495	5001	10342	6081
ENSG00000283367	ABBA01000933.1	0	0	0	0	0	0	0
ENSG00000283544	ABBA01000935.2	0	0	0	0	0	0	0
ENSG00000265233	ABBA01006766.1	0	0	0	0	0	0	0
ENSG00000283274	ABBA01010928.1	0	0	0	0	0	0	0
ENSG00000283568	ABBA01031658.1	0	0	0	0	0	0	0
ENSG00000283592	ABBA01031669.1	0	0	0	0	0	0	0
ENSG00000278294	ABBA01037345.1	0	0	0	0	0	0	4
ENSG00000278457	ABBA01037348.1	0	0	0	0	0	0	0
ENSG00000286916	ABBA01045074.1	0	0	0	0	0	0	0
ENSG00000287800	ABBA01045074.2	0	0	0	0	0	0	0
ENSG00000165029	ABCA1	6068	5865	11466	281	5624	9533	6531
ENSG00000154263	ABCA10	290	410	749	0	1045	323	470
ENSG00000251595	ABCA11P	17	32	32	0	26	13	29
ENSG00000144452	ABCA12	12	0	0	0	1	8	2
ENSG00000179869	ABCA13	16	45	46	13	45	4688	2862
ENSG00000238098	ABCA17P	3	4	7	0	9	5	3
ENSG00000107331	ABCA2	1614	1616	1619	449	1230	1657	1632
ENSG00000167972	ABCA3	85	53	56	29	84	174	123
ENSG00000198691	ABCA4	17	38	23	0	38	499	398
ENSG00000154265	ABCA5	2192	1801	2631	47	2039	1652	1996
ENSG00000154262	ABCA6	4374	6409	8894	49	4546	7942	6332
ENSG00000064687	ABCA7	125	233	198	0	248	259	199
ENSG00000141338	ABCA8	1873	2897	7989	106	2794	2310	3067
ENSG00000154258	ABCA9	632	1646	1591	1	1857	1003	1681
ENSG00000231749	ABCA9-AS1	0	0	1	0	0	5	2
ENSG00000085563	ABCB1	3242	849	791	61	1856	1907	561
ENSG00000135776	ABCB10	416	326	383	17	464	560	314
ENSG00000274099	ABCB10P1	0	0	0	0	0	0	0
ENSG00000261524	ABCB10P3	0	0	0	0	0	1	0
ENSG00000260053	ABCB10P4	0	0	0	0	1	0	0
ENSG00000073734	ABCB11	4702	6129	6863	208	2937	291	2097
ENSG00000005471	ABCB4	2281	2050	5446	142	7258	6526	2977
ENSG00000004846	ABCB5	1	0	0	0	2	731	351
ENSG00000115657	ABCB6	32	51	10	0	6	13	14
ENSG00000131269	ABCB7	453	315	503	1	581	698	364
ENSG00000197150	ABCB8	323	482	307	46	313	488	459
ENSG00000150967	ABCB9	58	86	48	0	73	98	162
ENSG00000103222	ABCC1	529	727	360	11	820	296	387
ENSG00000124574	ABCC10	223	546	343	0	343	266	413
ENSG00000121270	ABCC11	70	70	163	0	56	213	182
ENSG00000140798	ABCC12	0	2	10	0	0	8	6
ENSG00000243064	ABCC13	5	1	0	0	9	1	0
ENSG00000023839	ABCC2	9146	15080	8924	270	3808	6762	6608
ENSG00000108846	ABCC3	2969	5707	3434	384	2983	5345	4741
ENSG00000125257	ABCC4	278	206	167	3	350	354	221
ENSG00000114770	ABCC5	596	1167	798	1	1009	642	982
ENSG00000223882	ABCC5-AS1	3	2	0	0	3	0	0
ENSG00000091262	ABCC6	2378	3176	4662	52	1563	4575	3282
ENSG00000256340	ABCC6P1	440	590	812	36	359	330	424
ENSG00000255277	ABCC6P2	21	24	25	0	13	52	48
ENSG00000006071	ABCC8	2	4	2	0	14	0	7
ENSG00000069431	ABCC9	1632	1551	2473	75	2853	2571	1169
ENSG00000101986	ABCD1	279	344	218	28	115	643	363
ENSG00000215151	ABCD1P2	1	3	0	0	0	0	0
ENSG00000261233	ABCD1P3	0	0	0	0	0	0	0
ENSG00000225293	ABCD1P4	0	0	0	0	0	0	0
ENSG00000214330	ABCD1P5	0	0	0	0	0	0	0
ENSG00000173208	ABCD2	36	58	26	0	124	19	15
ENSG00000117528	ABCD3	2763	1742	2550	42	3938	1454	984
ENSG00000119688	ABCD4	420	781	776	30	593	580	583
ENSG00000164163	ABCE1	1289	370	559	27	995	565	260
ENSG00000204574	ABCF1	906	609	706	12	564	870	423
ENSG00000285292	ABCF2	0	0	0	0	0	0	0
ENSG00000033050	ABCF2	61	90	37	1	95	79	90
ENSG00000242159	ABCF2P1	0	0	0	0	0	0	0
ENSG00000228769	ABCF2P2	0	0	0	0	0	0	0
ENSG00000161204	ABCF3	582	587	576	28	501	619	455
ENSG00000160179	ABCG1	423	417	347	15	250	483	322
ENSG00000118777	ABCG2	1086	746	537	62	603	1976	703
ENSG00000172350	ABCG4	1	2	4	0	3	3	8
ENSG00000138075	ABCG5	941	2136	3174	119	1000	2870	2561
ENSG00000143921	ABCG8	2087	3841	4511	652	1962	3695	3706
ENSG00000143994	ABHD1	13	55	51	0	30	23	40
ENSG00000144827	ABHD10	431	287	317	0	433	687	260
ENSG00000106077	ABHD11	119	129	75	0	97	172	99
ENSG00000225969	ABHD11-AS1	0	0	0	0	1	0	5
ENSG00000100997	ABHD12	679	532	259	13	352	653	437
ENSG00000131969	ABHD12B	0	1	0	0	3	0	0
ENSG00000139826	ABHD13	271	185	352	0	595	317	206
ENSG00000248487	ABHD14A	26	41	24	0	23	35	28
ENSG00000114786	ABHD14A-ACY1	0	6	1	0	1	0	4
ENSG00000114779	ABHD14B	923	786	660	118	698	1102	690
ENSG00000168792	ABHD15	369	529	643	45	389	730	466
ENSG00000264031	ABHD15-AS1	0	0	0	0	0	0	0
ENSG00000204427	ABHD16A	19	83	24	0	75	14	60
ENSG00000183260	ABHD16B	2	0	0	0	0	0	0
ENSG00000129968	ABHD17A	248	541	243	1	348	289	383
ENSG00000198658	ABHD17AP1	0	0	0	0	0	0	0
ENSG00000250536	ABHD17AP3	0	0	0	0	0	0	0
ENSG00000229107	ABHD17AP4	0	0	0	0	0	0	0
ENSG00000263366	ABHD17AP5	0	0	2	0	2	0	0
ENSG00000226981	ABHD17AP6	0	0	0	0	0	0	0
ENSG00000260864	ABHD17AP7	0	0	0	0	0	0	0
ENSG00000260540	ABHD17AP8	0	0	0	0	0	0	0
ENSG00000261536	ABHD17AP9	0	0	0	0	0	0	0
ENSG00000107362	ABHD17B	253	130	198	11	312	232	109
ENSG00000136379	ABHD17C	167	106	52	1	109	80	49
ENSG00000164074	ABHD18	401	481	543	98	541	372	423
ENSG00000140526	ABHD2	8408	7270	13126	2139	12442	16907	9316
ENSG00000158201	ABHD3	309	294	348	0	500	296	256
ENSG00000100439	ABHD4	931	659	203	40	269	235	182
ENSG00000011198	ABHD5	368	498	608	9	428	327	276
ENSG00000163686	ABHD6	495	463	763	1	675	420	326
ENSG00000127220	ABHD8	133	94	115	65	86	156	55
ENSG00000136754	ABI1	771	652	575	6	993	620	412
ENSG00000271484	ABI1P1	0	0	0	0	0	0	0
ENSG00000138443	ABI2	463	783	492	10	1001	708	768
ENSG00000108798	ABI3	110	178	181	15	153	119	107
ENSG00000154175	ABI3BP	110	202	296	0	960	12	187
ENSG00000119328	ABITRAM	209	182	110	0	197	177	181
ENSG00000251106	ABITRAMP1	0	0	0	0	0	0	4
ENSG00000097007	ABL1	931	1051	749	92	847	834	791
ENSG00000143322	ABL2	777	1080	767	19	935	555	783
ENSG00000099204	ABLIM1	2614	2687	1808	158	2155	2635	2508
ENSG00000163995	ABLIM2	224	304	53	0	132	79	118
ENSG00000173210	ABLIM3	1420	3283	4459	198	1293	3945	3870
ENSG00000175164	ABO	2	4	18	0	13	58	58
ENSG00000159842	ABR	392	687	487	53	781	444	482
ENSG00000174429	ABRA	0	0	0	0	1	0	0
ENSG00000146386	ABRACL	126	68	100	0	158	364	115
ENSG00000163322	ABRAXAS1	183	133	79	0	207	106	67
ENSG00000165660	ABRAXAS2	318	194	242	0	328	244	159
ENSG00000146109	ABT1	199	209	135	0	212	199	128
ENSG00000250496	ABT1P1	0	0	0	0	0	0	0
ENSG00000114626	ABTB1	252	506	351	1	361	287	266
ENSG00000166016	ABTB2	273	511	416	104	254	333	433
ENSG00000275635	AC000029.1	0	0	0	0	0	0	0
ENSG00000283438	AC000029.2	0	2	1	0	1	1	1
ENSG00000260246	AC000032.1	0	1	0	0	0	0	0
ENSG00000282816	AC000035.1	2	0	0	0	0	0	0
ENSG00000225929	AC000036.1	0	0	0	0	0	0	0
ENSG00000242156	AC000041.1	0	0	0	0	0	0	0
ENSG00000212569	AC000050.1	0	0	0	0	0	0	0
ENSG00000286508	AC000050.3	6	36	29	0	23	56	46
ENSG00000223665	AC000058.1	0	0	0	0	5	0	4
ENSG00000083622	AC000061.1	0	0	0	0	0	1	0
ENSG00000286742	AC000065.1	0	0	0	0	0	2	0
ENSG00000287932	AC000065.2	33	117	29	0	60	19	45
ENSG00000225007	AC000067.1	0	0	0	0	0	0	0
ENSG00000185065	AC000068.1	6	12	10	0	8	6	11
ENSG00000273212	AC000068.2	3	0	4	0	2	0	2
ENSG00000273300	AC000068.3	3	9	1	0	5	9	7
ENSG00000286367	AC000072.1	0	0	0	0	0	0	3
ENSG00000230485	AC000077.1	0	0	0	0	0	0	0
ENSG00000232926	AC000078.1	0	0	0	0	0	0	0
ENSG00000230194	AC000081.1	1	4	3	0	4	1	0
ENSG00000251940	AC000081.2	0	0	0	0	0	0	0
ENSG00000287652	AC000082.1	0	8	0	0	0	0	4
ENSG00000287146	AC000085.1	8	8	22	0	2	15	8
ENSG00000235776	AC000089.1	3	3	9	0	8	9	1
ENSG00000284874	AC000093.1	2	3	0	0	0	0	3
ENSG00000270393	AC000095.1	1	8	0	0	6	3	9
ENSG00000283366	AC000095.2	0	0	0	0	0	0	0
ENSG00000286025	AC000095.3	1	4	2	0	1	7	0
ENSG00000234001	AC000111.1	0	0	0	0	0	0	0
ENSG00000237974	AC000111.2	2	4	1	0	29	0	6
ENSG00000287685	AC000113.1	0	0	0	0	0	0	0
ENSG00000200436	AC000114.1	0	0	0	0	0	0	0
ENSG00000200769	AC000120.1	0	1	2	0	13	2	4
ENSG00000243107	AC000120.2	13	46	31	0	64	20	35
ENSG00000285772	AC000120.3	0	0	0	0	0	0	0
ENSG00000285953	AC000120.4	0	0	0	0	0	0	0
ENSG00000224138	AC000123.1	0	0	0	0	0	0	0
ENSG00000279265	AC000123.2	7	32	18	0	37	48	91
ENSG00000280347	AC000123.3	202	221	251	0	513	298	249
ENSG00000226770	AC000124.1	0	0	0	0	0	0	0
ENSG00000230820	AC000362.1	0	0	0	0	0	0	0
ENSG00000224981	AC000367.1	18	9	8	0	3	0	0
ENSG00000241921	AC000372.1	0	0	0	0	0	0	0
ENSG00000227249	AC000374.1	0	0	0	0	0	0	0
ENSG00000278727	AC000403.1	10	3	4	0	11	4	1
ENSG00000274898	AC001226.1	1	7	5	0	12	6	6
ENSG00000283208	AC001226.2	2	0	1	0	0	2	2
ENSG00000272330	AC002044.1	2	15	10	0	16	7	16
ENSG00000279591	AC002044.2	10	84	24	0	37	55	66
ENSG00000280092	AC002044.3	9	27	23	0	36	29	43
ENSG00000213683	AC002056.1	0	1	5	0	0	3	1
ENSG00000254499	AC002056.2	0	0	0	0	0	0	0
ENSG00000287568	AC002057.1	2	0	0	0	0	0	0
ENSG00000287702	AC002057.2	0	0	0	0	0	0	0
ENSG00000273216	AC002059.1	3	16	1	0	1	5	12
ENSG00000280968	AC002059.2	0	0	0	0	3	0	0
ENSG00000285697	AC002059.3	1	3	1	0	0	0	7
ENSG00000207488	AC002064.1	1	0	1	0	0	1	4
ENSG00000225498	AC002064.2	0	8	6	0	8	20	31
ENSG00000234459	AC002064.3	0	0	0	0	1	0	0
ENSG00000280440	AC002064.4	0	6	0	0	0	3	3
ENSG00000237813	AC002066.1	6	13	1	0	10	23	35
ENSG00000207094	AC002069.1	0	0	0	0	0	0	0
ENSG00000233420	AC002069.2	0	0	0	0	0	1	1
ENSG00000235639	AC002069.3	0	0	0	0	0	0	0
ENSG00000270812	AC002069.4	0	0	0	0	0	1	0
ENSG00000248636	AC002070.1	5	15	5	0	17	27	12
ENSG00000286072	AC002072.1	0	0	0	0	14	1	1
ENSG00000202019	AC002073.1	0	0	0	0	0	0	0
ENSG00000285090	AC002074.1	0	0	0	0	6	1	0
ENSG00000285964	AC002074.2	0	0	0	0	0	0	0
ENSG00000225898	AC002075.1	0	0	0	0	0	0	0
ENSG00000237729	AC002075.2	0	0	0	0	0	0	0
ENSG00000234695	AC002076.1	0	1	0	0	0	0	0
ENSG00000278388	AC002076.2	0	0	0	0	0	0	0
ENSG00000279743	AC002090.1	0	0	0	0	0	0	0
ENSG00000265975	AC002091.1	9	7	5	0	7	2	1
ENSG00000266389	AC002091.2	3	8	2	0	5	1	4
ENSG00000258924	AC002094.1	0	0	0	0	0	0	0
ENSG00000265618	AC002094.2	1	3	0	0	5	1	0
ENSG00000273171	AC002094.3	0	0	0	0	0	0	0
ENSG00000277450	AC002094.4	3	10	3	0	7	2	3
ENSG00000279532	AC002094.5	0	0	0	0	0	0	0
ENSG00000261018	AC002101.1	0	0	0	0	0	0	0
ENSG00000267626	AC002115.1	0	0	0	0	0	0	0
ENSG00000248101	AC002116.1	0	0	0	0	0	0	0
ENSG00000267698	AC002116.2	2	1	2	0	5	4	4
ENSG00000227979	AC002127.1	0	0	0	0	0	0	0
ENSG00000268947	AC002128.1	7	31	14	0	44	3	33
ENSG00000271366	AC002128.2	0	0	0	0	1	0	1
ENSG00000259242	AC002306.1	0	4	0	0	0	0	4
ENSG00000235560	AC002310.1	21	54	40	0	16	26	49
ENSG00000239791	AC002310.2	0	5	5	0	1	0	4
ENSG00000260494	AC002310.3	0	0	0	0	0	0	0
ENSG00000261459	AC002310.4	0	0	0	0	0	0	0
ENSG00000278922	AC002310.5	2	7	2	0	1	1	2
ENSG00000132359	AC002316.1	172	268	131	0	215	63	141
ENSG00000286712	AC002331.1	0	0	0	0	0	0	0
ENSG00000261433	AC002347.1	5	17	10	0	7	12	18
ENSG00000263388	AC002347.2	2	1	0	0	0	0	0
ENSG00000202335	AC002350.1	0	0	0	0	0	0	0
ENSG00000278993	AC002350.2	3	8	4	0	5	12	8
ENSG00000258240	AC002351.1	0	1	0	0	0	0	0
ENSG00000202469	AC002359.1	2	0	2	0	6	0	0
ENSG00000206844	AC002365.1	0	0	0	0	0	0	0
ENSG00000232392	AC002366.1	1	15	5	0	27	9	15
ENSG00000237741	AC002368.1	0	0	0	0	0	0	0
ENSG00000257268	AC002375.1	0	0	0	0	0	0	0
ENSG00000286163	AC002377.1	6	22	26	0	6	231	150
ENSG00000225676	AC002378.1	0	0	0	0	0	0	0
ENSG00000228341	AC002381.1	0	0	0	0	0	0	0
ENSG00000227863	AC002383.1	0	0	0	0	1	0	0
ENSG00000230941	AC002386.1	0	0	0	0	0	0	0
ENSG00000272215	AC002395.1	0	16	3	0	11	4	5
ENSG00000267049	AC002398.1	0	0	0	0	0	0	0
ENSG00000267328	AC002398.2	2	13	0	0	1	1	13
ENSG00000261528	AC002400.1	0	0	0	0	0	0	0
ENSG00000236472	AC002401.1	0	1	8	0	3	0	0
ENSG00000250282	AC002401.2	10	12	4	0	11	17	17
ENSG00000275025	AC002401.3	7	19	6	0	6	15	19
ENSG00000276851	AC002401.4	0	0	0	0	0	0	0
ENSG00000200572	AC002407.1	0	0	0	0	0	0	0
ENSG00000283638	AC002407.2	0	1	0	0	3	2	2
ENSG00000212434	AC002416.1	1	2	7	0	9	4	6
ENSG00000253927	AC002428.1	0	0	0	0	0	3	7
ENSG00000254239	AC002428.2	0	0	0	0	0	1	0
ENSG00000231153	AC002429.1	0	0	2	0	2	0	3
ENSG00000236197	AC002429.2	0	0	0	0	0	0	0
ENSG00000231170	AC002451.1	25	41	109	0	61	130	108
ENSG00000279525	AC002451.2	6	10	3	0	1	17	33
ENSG00000223969	AC002456.1	14	36	20	0	31	106	101
ENSG00000251154	AC002456.2	0	4	4	0	0	1	3
ENSG00000286411	AC002458.1	0	0	0	0	0	0	0
ENSG00000249317	AC002460.1	0	0	0	0	0	0	0
ENSG00000287292	AC002460.2	2	7	22	0	17	16	25
ENSG00000199764	AC002461.1	0	0	0	0	0	0	0
ENSG00000223646	AC002463.1	0	0	0	0	0	3	3
ENSG00000260188	AC002464.1	0	0	0	0	0	0	2
ENSG00000286390	AC002465.1	0	0	0	0	0	0	0
ENSG00000241764	AC002467.1	9	11	10	0	10	19	17
ENSG00000272829	AC002470.1	4	11	4	0	3	8	11
ENSG00000285314	AC002470.2	0	1	0	0	0	0	0
ENSG00000226872	AC002472.1	0	0	0	0	1	0	0
ENSG00000284060	AC002472.2	0	0	0	0	1	1	0
ENSG00000284130	AC002472.3	0	1	0	0	1	0	0
ENSG00000284665	AC002472.4	0	0	0	0	0	0	0
ENSG00000232759	AC002480.1	0	2	3	0	2	4	3
ENSG00000232949	AC002480.2	1	2	0	0	0	6	3
ENSG00000223866	AC002486.1	0	0	0	0	0	0	0
ENSG00000231525	AC002486.2	0	0	0	0	0	0	0
ENSG00000270425	AC002487.1	0	0	0	0	0	0	0
ENSG00000214111	AC002504.1	0	0	0	0	0	0	0
ENSG00000232680	AC002511.1	1	2	2	0	1	0	0
ENSG00000233214	AC002511.2	0	0	0	0	0	2	0
ENSG00000283479	AC002511.3	0	0	0	0	0	0	0
ENSG00000259810	AC002519.1	4	10	14	0	11	12	6
ENSG00000261457	AC002519.2	3	6	2	0	0	0	0
ENSG00000233247	AC002524.1	0	0	0	0	2	2	3
ENSG00000279314	AC002525.1	0	0	0	0	0	0	0
ENSG00000287827	AC002529.1	0	0	0	0	0	0	0
ENSG00000279067	AC002540.1	0	0	0	0	1	2	0
ENSG00000227532	AC002542.1	0	0	0	0	0	0	0
ENSG00000274344	AC002542.2	0	0	2	0	2	0	4
ENSG00000275054	AC002542.3	0	0	0	0	0	0	0
ENSG00000278482	AC002542.4	0	0	0	0	0	0	0
ENSG00000278526	AC002542.5	0	0	0	0	1	2	0
ENSG00000287829	AC002542.6	0	0	0	0	0	0	0
ENSG00000235945	AC002543.1	0	1	0	0	0	0	0
ENSG00000252115	AC002543.2	0	0	0	0	0	0	0
ENSG00000267184	AC002545.1	0	0	0	0	0	0	0
ENSG00000267653	AC002546.1	0	0	0	0	0	3	0
ENSG00000261312	AC002550.1	1	1	0	0	0	2	1
ENSG00000276571	AC002550.2	2	4	2	0	2	9	0
ENSG00000261736	AC002551.1	5	13	2	0	6	8	9
ENSG00000227782	AC002553.1	7	23	6	0	25	10	31
ENSG00000275413	AC002553.2	33	15	61	0	26	20	8
ENSG00000239291	AC002558.1	9	37	34	0	40	21	25
ENSG00000261872	AC002558.2	0	0	0	0	0	0	0
ENSG00000262265	AC002558.3	32	139	50	0	116	43	96
ENSG00000255692	AC002563.1	0	0	0	0	0	2	0
ENSG00000206792	AC002980.1	0	0	0	0	0	0	0
ENSG00000206795	AC002981.1	0	0	0	0	0	0	0
ENSG00000267005	AC002984.1	0	0	0	0	0	3	0
ENSG00000268193	AC002985.1	0	0	0	0	0	0	0
ENSG00000257767	AC002996.1	0	0	0	0	0	0	0
ENSG00000235461	AC003001.1	0	0	0	0	0	0	0
ENSG00000276391	AC003001.2	0	0	0	0	0	0	0
ENSG00000268133	AC003002.1	0	0	0	0	0	0	0
ENSG00000268533	AC003002.2	3	0	1	0	8	3	9
ENSG00000269533	AC003002.3	1	0	0	0	2	1	0
ENSG00000268107	AC003005.1	0	0	0	0	0	0	0
ENSG00000268266	AC003005.2	0	2	0	0	3	0	0
ENSG00000269026	AC003006.1	0	0	0	0	0	0	0
ENSG00000262011	AC003009.1	0	0	0	0	0	0	0
ENSG00000212663	AC003035.1	0	3	0	0	3	4	0
ENSG00000233535	AC003035.2	0	0	0	0	0	0	0
ENSG00000221496	AC003043.1	0	0	0	0	0	0	0
ENSG00000267211	AC003043.2	0	0	0	0	0	0	0
ENSG00000285486	AC003043.3	0	0	0	0	0	1	0
ENSG00000287523	AC003044.1	0	1	0	0	0	0	1
ENSG00000214684	AC003045.1	0	0	0	0	2	0	0
ENSG00000267344	AC003070.1	1	0	1	0	0	0	0
ENSG00000267446	AC003070.2	6	4	2	0	1	1	1
ENSG00000225971	AC003071.1	1	1	0	0	0	0	0
ENSG00000226573	AC003071.2	0	0	0	0	0	0	0
ENSG00000250318	AC003072.1	3	9	4	0	9	9	10
ENSG00000288153	AC003072.2	1	0	0	0	0	0	0
ENSG00000287011	AC003077.1	0	0	0	0	0	2	0
ENSG00000234358	AC003080.1	14	50	82	0	34	32	32
ENSG00000234826	AC003084.1	0	1	0	0	0	0	2
ENSG00000287672	AC003086.1	7	8	1	0	1	4	3
ENSG00000227930	AC003087.1	0	0	0	0	0	0	0
ENSG00000236453	AC003092.1	0	0	0	0	0	0	0
ENSG00000236938	AC003092.2	0	0	0	0	0	0	0
ENSG00000287093	AC003093.1	1	2	3	0	3	4	9
ENSG00000267604	AC003098.1	0	0	0	0	0	0	0
ENSG00000228768	AC003101.1	8	59	36	0	23	75	137
ENSG00000278546	AC003101.2	8	32	27	0	18	47	97
ENSG00000278977	AC003101.3	1	1	0	0	0	0	0
ENSG00000260793	AC003102.1	30	92	27	0	51	21	45
ENSG00000212590	AC003109.1	0	0	0	0	0	0	0
ENSG00000207151	AC003657.1	0	1	0	0	0	0	0
ENSG00000278218	AC003657.2	0	0	0	0	1	0	1
ENSG00000237994	AC003659.1	0	0	5	0	0	30	27
ENSG00000227042	AC003666.1	0	0	0	0	0	1	5
ENSG00000237539	AC003669.1	0	7	1	0	3	0	1
ENSG00000279159	AC003681.1	179	731	191	21	134	4132	5648
ENSG00000268392	AC003682.1	1	9	3	0	11	6	6
ENSG00000228543	AC003684.1	0	0	0	0	0	0	0
ENSG00000229012	AC003685.1	0	0	0	0	0	3	0
ENSG00000231619	AC003685.2	0	0	1	0	0	1	0
ENSG00000257807	AC003686.1	0	0	0	0	0	3	0
ENSG00000264598	AC003687.1	0	0	0	0	0	0	0
ENSG00000202251	AC003688.1	0	0	0	0	0	0	0
ENSG00000262302	AC003688.2	0	0	0	0	0	0	0
ENSG00000263342	AC003688.3	0	0	0	0	0	0	0
ENSG00000285785	AC003950.1	0	0	0	0	0	0	0
ENSG00000268564	AC003956.1	0	0	0	0	0	1	0
ENSG00000279825	AC003957.1	0	0	0	0	0	0	0
ENSG00000108516	AC003958.1	0	0	0	0	0	0	0
ENSG00000234859	AC003958.2	0	0	0	0	0	0	0
ENSG00000263280	AC003965.1	1	1	0	0	2	4	3
ENSG00000263325	AC003965.2	0	0	0	0	0	0	0
ENSG00000269504	AC003973.1	0	0	0	0	0	0	5
ENSG00000279377	AC003973.2	0	0	0	0	3	1	4
ENSG00000197462	AC003975.1	0	0	0	0	0	0	0
ENSG00000256695	AC003982.1	0	0	0	0	0	0	0
ENSG00000235139	AC003984.1	0	0	0	0	2	0	0
ENSG00000233824	AC003985.1	0	0	0	0	0	1	0
ENSG00000229533	AC003986.1	2	0	3	0	0	0	0
ENSG00000232821	AC003986.2	0	0	0	0	0	0	0
ENSG00000236536	AC003986.3	0	0	0	0	0	0	0
ENSG00000234223	AC003988.1	2	0	21	0	13	32	33
ENSG00000227948	AC003989.1	0	0	0	0	0	0	1
ENSG00000243621	AC003989.2	0	0	0	0	0	0	0
ENSG00000228113	AC003991.1	0	6	1	0	12	16	31
ENSG00000254003	AC003991.2	0	0	0	0	0	3	0
ENSG00000282859	AC003992.1	0	14	21	0	9	2	15
ENSG00000237903	AC004000.1	5	46	6	0	12	21	40
ENSG00000270317	AC004004.1	0	0	0	0	4	0	0
ENSG00000228711	AC004006.1	0	0	0	0	0	0	0
ENSG00000224322	AC004009.1	0	0	0	0	0	0	0
ENSG00000279429	AC004009.2	0	0	0	0	0	0	0
ENSG00000279655	AC004009.3	0	0	0	0	0	0	0
ENSG00000233942	AC004012.1	8	33	49	0	24	52	58
ENSG00000229603	AC004014.1	0	0	0	0	0	0	0
ENSG00000279043	AC004014.2	0	0	0	0	0	0	0
ENSG00000228751	AC004022.1	0	2	0	0	0	1	5
ENSG00000237160	AC004022.2	14	66	35	0	24	39	32
ENSG00000261462	AC004023.1	0	0	0	0	0	0	0
ENSG00000257624	AC004024.1	0	13	4	0	8	6	12
ENSG00000262482	AC004034.1	0	0	0	0	0	2	0
ENSG00000230612	AC004039.1	1	0	0	0	0	0	0
ENSG00000286291	AC004047.1	0	0	0	0	0	0	0
ENSG00000251170	AC004052.1	0	0	0	0	0	0	0
ENSG00000248242	AC004053.1	0	0	2	0	0	0	0
ENSG00000248984	AC004054.1	0	0	0	0	0	0	0
ENSG00000196656	AC004057.1	0	0	0	0	0	0	0
ENSG00000251312	AC004062.1	0	0	0	0	0	0	0
ENSG00000250670	AC004063.1	0	0	1	0	0	2	0
ENSG00000216425	AC004066.1	0	0	2	0	0	0	0
ENSG00000250522	AC004066.2	0	0	0	0	2	0	0
ENSG00000273447	AC004067.1	3	6	5	0	22	1	0
ENSG00000251259	AC004069.1	0	1	6	0	6	1	0
ENSG00000251473	AC004069.2	0	0	1	0	0	0	0
ENSG00000252136	AC004069.3	0	0	0	0	0	0	0
ENSG00000237014	AC004074.1	0	0	0	0	0	0	0
ENSG00000268163	AC004076.1	0	2	0	0	0	1	0
ENSG00000276449	AC004076.2	12	80	18	0	29	12	24
ENSG00000274396	AC004079.1	0	0	0	0	0	0	0
ENSG00000274864	AC004079.2	0	0	0	0	0	0	0
ENSG00000276528	AC004079.3	0	0	0	0	0	0	0
ENSG00000276771	AC004079.4	0	0	0	0	0	0	0
ENSG00000277694	AC004079.5	0	0	0	0	0	0	0
ENSG00000253308	AC004080.1	0	0	0	0	0	0	0
ENSG00000277469	AC004080.10	0	0	0	0	0	0	0
ENSG00000277553	AC004080.11	0	0	0	0	0	0	0
ENSG00000277966	AC004080.12	0	0	0	0	0	0	0
ENSG00000278020	AC004080.13	0	0	0	0	0	0	0
ENSG00000278334	AC004080.14	0	0	0	0	0	0	0
ENSG00000278592	AC004080.15	0	0	0	0	0	0	0
ENSG00000278708	AC004080.16	0	0	0	0	0	0	0
ENSG00000286323	AC004080.17	0	0	0	0	0	0	0
ENSG00000253508	AC004080.2	0	0	0	0	0	0	0
ENSG00000257184	AC004080.3	0	0	0	0	0	0	0
ENSG00000270182	AC004080.4	0	0	0	0	0	0	0
ENSG00000272801	AC004080.5	0	0	0	0	0	0	0
ENSG00000273433	AC004080.6	0	0	0	0	0	0	0
ENSG00000273961	AC004080.7	0	0	0	0	0	0	0
ENSG00000276496	AC004080.8	0	0	0	0	0	0	0
ENSG00000276609	AC004080.9	0	0	0	0	0	0	0
ENSG00000254180	AC004083.1	5	24	24	0	15	35	32
ENSG00000226851	AC004112.1	1	0	0	0	2	9	4
ENSG00000201541	AC004125.1	0	0	0	0	0	0	0
ENSG00000202233	AC004129.1	0	0	0	0	0	0	0
ENSG00000213798	AC004129.2	0	0	0	0	0	0	0
ENSG00000234406	AC004129.3	0	0	0	0	0	0	0
ENSG00000285716	AC004129.4	0	0	0	0	0	0	0
ENSG00000200753	AC004130.1	0	0	1	0	1	0	0
ENSG00000271133	AC004130.2	1	0	0	0	6	1	0
ENSG00000267592	AC004134.1	0	0	0	0	0	0	0
ENSG00000263485	AC004147.1	0	0	0	0	0	0	0
ENSG00000263571	AC004147.2	0	0	0	0	0	0	0
ENSG00000264791	AC004147.3	0	0	0	0	0	0	0
ENSG00000265356	AC004147.4	0	0	0	0	0	0	0
ENSG00000265775	AC004147.5	0	0	0	0	0	0	0
ENSG00000263272	AC004148.1	5	11	4	0	5	3	14
ENSG00000180448	AC004151.1	195	400	306	11	460	255	249
ENSG00000267666	AC004156.1	7	21	18	1	6	28	23
ENSG00000260664	AC004158.1	0	1	0	0	0	0	0
ENSG00000230333	AC004160.1	118	350	591	0	343	423	617
ENSG00000230435	AC004160.2	23	37	50	19	52	59	100
ENSG00000257494	AC004217.1	0	0	0	0	0	0	0
ENSG00000257658	AC004217.2	0	0	0	0	0	0	0
ENSG00000267778	AC004221.1	0	0	0	0	0	0	0
ENSG00000243423	AC004223.1	0	0	0	0	0	0	0
ENSG00000267457	AC004223.2	13	60	32	0	57	25	53
ENSG00000267618	AC004223.3	0	0	0	0	0	0	0
ENSG00000273687	AC004223.4	0	9	0	0	0	0	0
ENSG00000240311	AC004224.1	0	0	0	0	1	0	0
ENSG00000263212	AC004224.2	0	0	0	0	0	0	0
ENSG00000234477	AC004231.1	1	0	0	0	1	0	0
ENSG00000265359	AC004231.3	1	0	0	0	1	0	0
ENSG00000262899	AC004232.1	0	0	0	0	0	0	0
ENSG00000279031	AC004232.2	0	15	7	0	9	7	21
ENSG00000262362	AC004233.1	1	4	4	0	10	2	9
ENSG00000272079	AC004233.2	21	37	33	0	47	88	106
ENSG00000274367	AC004233.3	0	8	4	0	6	0	0
ENSG00000257433	AC004241.1	40	102	49	0	94	65	63
ENSG00000274902	AC004241.2	8	33	14	0	25	21	17
ENSG00000276390	AC004241.3	2	3	1	0	14	4	3
ENSG00000277173	AC004241.4	3	6	3	0	3	3	12
ENSG00000280054	AC004241.5	3	6	0	0	11	7	10
ENSG00000263990	AC004253.1	0	0	0	0	0	1	0
ENSG00000265046	AC004253.2	0	0	0	0	0	0	0
ENSG00000269635	AC004257.1	0	2	0	0	0	0	0
ENSG00000275936	AC004263.1	3	6	6	0	2	6	15
ENSG00000286067	AC004263.2	11	30	22	0	10	10	38
ENSG00000268812	AC004264.1	2	3	0	0	2	0	0
ENSG00000279699	AC004264.2	5	1	2	0	8	9	5
ENSG00000260510	AC004381.1	3	10	9	0	1	2	6
ENSG00000275908	AC004381.2	0	1	0	0	0	0	5
ENSG00000283399	AC004381.3	17	121	51	8	82	2	92
ENSG00000285303	AC004381.4	0	3	1	0	6	3	6
ENSG00000226107	AC004383.1	1	4	1	0	3	0	5
ENSG00000213269	AC004386.1	0	0	0	0	0	0	3
ENSG00000226515	AC004386.2	0	0	0	0	0	0	0
ENSG00000273974	AC004386.3	0	0	0	0	0	0	0
ENSG00000275254	AC004386.4	0	0	0	0	0	0	0
ENSG00000275625	AC004386.5	0	0	0	0	0	0	0
ENSG00000277922	AC004386.6	0	0	0	0	0	0	0
ENSG00000278421	AC004386.7	0	1	0	0	0	0	2
ENSG00000266101	AC004408.1	0	0	0	0	1	0	1
ENSG00000280177	AC004408.2	3	7	2	0	5	0	4
ENSG00000236414	AC004415.1	0	0	0	0	0	0	0
ENSG00000231477	AC004448.1	0	0	0	0	0	0	0
ENSG00000235979	AC004448.2	0	2	0	0	0	0	0
ENSG00000265126	AC004448.3	0	0	0	0	0	0	0
ENSG00000283675	AC004448.4	0	0	0	0	0	0	0
ENSG00000287196	AC004448.5	0	0	0	0	0	0	0
ENSG00000261204	AC004449.1	0	0	0	0	0	0	2
ENSG00000146677	AC004453.1	3	2	0	0	4	1	7
ENSG00000279853	AC004453.2	1	0	1	0	7	6	11
ENSG00000206739	AC004461.1	0	0	0	0	0	0	0
ENSG00000237347	AC004461.2	0	0	0	0	0	0	0
ENSG00000281530	AC004461.3	14	86	16	0	29	11	94
ENSG00000287027	AC004464.1	0	0	1	0	0	1	0
ENSG00000268069	AC004466.1	9	6	4	0	6	8	1
ENSG00000274737	AC004466.2	5	34	9	0	41	12	19
ENSG00000276691	AC004466.3	0	1	0	0	4	0	14
ENSG00000275194	AC004467.1	0	0	0	0	0	0	0
ENSG00000237019	AC004470.1	0	0	0	0	0	0	0
ENSG00000288546	AC004470.2	0	1	0	0	2	34	23
ENSG00000223461	AC004471.1	0	5	0	0	1	1	0
ENSG00000272682	AC004471.2	0	0	0	0	0	0	0
ENSG00000263412	AC004477.1	26	98	41	0	20	28	82
ENSG00000266341	AC004477.2	3	0	2	0	1	1	3
ENSG00000278765	AC004477.3	1	3	4	0	12	3	2
ENSG00000228944	AC004485.1	0	0	0	0	0	0	0
ENSG00000257905	AC004486.1	0	0	0	0	0	0	0
ENSG00000267122	AC004490.1	0	0	0	0	0	1	0
ENSG00000279996	AC004491.1	5	32	4	0	41	23	21
ENSG00000272072	AC004492.1	5	25	15	0	25	21	20
ENSG00000262312	AC004494.1	2	50	17	0	21	14	18
ENSG00000278942	AC004494.2	0	5	0	0	1	1	0
ENSG00000273782	AC004510.1	0	0	0	0	0	0	0
ENSG00000199711	AC004522.1	0	0	0	0	0	0	0
ENSG00000222966	AC004522.2	0	0	0	0	0	0	0
ENSG00000235713	AC004522.3	4	3	0	0	4	17	3
ENSG00000237640	AC004522.4	2	0	5	0	3	0	5
ENSG00000286921	AC004522.5	0	0	0	0	0	1	0
ENSG00000286923	AC004522.6	5	10	12	0	24	7	11
ENSG00000266990	AC004528.1	0	0	0	0	0	0	0
ENSG00000274177	AC004528.2	4	1	1	0	0	1	2
ENSG00000214870	AC004540.1	19	35	20	0	53	18	69
ENSG00000225792	AC004540.2	11	19	21	0	41	0	30
ENSG00000269972	AC004542.1	0	0	0	0	0	0	0
ENSG00000269987	AC004542.2	2	1	1	0	0	0	0
ENSG00000275307	AC004542.3	0	0	0	0	0	0	0
ENSG00000276057	AC004542.4	0	0	0	0	0	0	0
ENSG00000276664	AC004542.5	0	0	0	0	0	0	0
ENSG00000276965	AC004542.6	0	0	0	0	0	0	0
ENSG00000237921	AC004543.1	0	0	0	0	0	0	0
ENSG00000287489	AC004549.1	0	0	0	0	0	0	0
ENSG00000257452	AC004551.1	0	0	0	0	0	2	0
ENSG00000225071	AC004552.1	0	0	0	0	0	0	0
ENSG00000223418	AC004554.1	0	0	0	0	0	0	0
ENSG00000282840	AC004554.2	0	9	0	0	0	3	0
ENSG00000273532	AC004556.1	0	0	0	0	0	0	0
ENSG00000275661	AC004556.2	0	0	0	0	0	0	0
ENSG00000276345	AC004556.3	5	4	7	0	0	0	0
ENSG00000276351	AC004556.4	0	0	0	0	0	0	0
ENSG00000199801	AC004562.1	0	0	0	0	0	0	0
ENSG00000262298	AC004584.1	0	0	0	0	0	0	0
ENSG00000262623	AC004584.2	0	3	0	0	0	0	0
ENSG00000263120	AC004584.3	8	35	6	0	22	4	13
ENSG00000266088	AC004585.1	13	17	5	0	26	9	5
ENSG00000279775	AC004585.2	0	0	1	0	0	0	0
ENSG00000251239	AC004590.1	0	0	0	0	0	0	0
ENSG00000285081	AC004593.1	7	24	28	0	5	69	160
ENSG00000285162	AC004593.2	2	9	5	0	6	5	11
ENSG00000240499	AC004594.1	0	0	0	0	0	0	1
ENSG00000267394	AC004596.1	2	0	1	0	3	1	5
ENSG00000268673	AC004597.1	0	0	0	0	0	0	0
ENSG00000279488	AC004623.1	7	11	7	0	5	2	7
ENSG00000267304	AC004637.1	0	1	0	0	0	0	0
ENSG00000252266	AC004664.1	0	0	0	0	0	0	0
ENSG00000249028	AC004672.1	0	0	0	0	1	0	4
ENSG00000267285	AC004672.2	2	17	6	0	13	10	16
ENSG00000231216	AC004674.1	0	0	0	0	0	0	0
ENSG00000235592	AC004674.2	0	0	0	0	0	0	0
ENSG00000275468	AC004678.1	4	77	6	0	5	8	27
ENSG00000279653	AC004678.2	3	9	3	0	9	6	9
ENSG00000265206	AC004687.1	25	396	12	0	103	29	89
ENSG00000285897	AC004687.2	4	13	5	0	5	4	8
ENSG00000286788	AC004687.3	0	2	0	0	1	0	0
ENSG00000225583	AC004690.1	0	0	0	0	0	0	0
ENSG00000241345	AC004690.2	0	0	0	0	0	0	0
ENSG00000229263	AC004691.1	0	0	0	0	0	0	0
ENSG00000250424	AC004691.2	0	0	0	0	0	0	0
ENSG00000213717	AC004692.1	0	0	0	0	0	0	1
ENSG00000228680	AC004692.2	0	0	0	0	2	0	0
ENSG00000276578	AC004696.1	0	0	0	0	0	0	0
ENSG00000279405	AC004696.2	0	0	0	0	0	0	0
ENSG00000263494	AC004702.1	2	1	0	0	4	0	3
ENSG00000249815	AC004704.1	0	0	0	0	0	0	1
ENSG00000261996	AC004706.1	0	1	3	0	11	2	7
ENSG00000262990	AC004706.2	0	0	0	0	0	0	0
ENSG00000282936	AC004706.3	18	143	45	0	17	32	104
ENSG00000206824	AC004707.1	1	0	0	0	5	0	2
ENSG00000253102	AC004707.2	1	0	2	0	2	3	1
ENSG00000285704	AC004765.1	0	0	0	0	0	0	0
ENSG00000234203	AC004771.1	21	60	21	0	41	14	39
ENSG00000262227	AC004771.2	14	35	21	0	8	10	19
ENSG00000262429	AC004771.3	2	55	18	0	7	10	24
ENSG00000262678	AC004771.4	1	11	2	0	1	0	9
ENSG00000274409	AC004774.1	0	0	0	0	0	0	0
ENSG00000274709	AC004774.2	0	0	0	0	0	0	0
ENSG00000277124	AC004774.3	0	0	0	0	0	0	0
ENSG00000272203	AC004775.1	0	4	1	0	1	0	0
ENSG00000279370	AC004777.1	0	1	1	0	0	0	0
ENSG00000282943	AC004784.1	0	0	0	0	1	4	2
ENSG00000251802	AC004788.1	0	0	0	0	0	0	0
ENSG00000277766	AC004790.1	0	0	0	0	0	0	0
ENSG00000280412	AC004790.2	0	6	2	0	0	0	0
ENSG00000274777	AC004792.1	0	0	0	0	0	0	0
ENSG00000177369	AC004797.1	0	11	2	0	4	4	3
ENSG00000226138	AC004801.1	0	0	0	0	0	0	0
ENSG00000240399	AC004801.2	8	8	16	0	13	11	19
ENSG00000257955	AC004801.3	0	0	0	0	0	0	0
ENSG00000257985	AC004801.4	0	3	0	0	0	0	0
ENSG00000258203	AC004801.5	0	0	0	0	0	0	0
ENSG00000276814	AC004801.6	1	3	3	0	3	3	2
ENSG00000279840	AC004801.7	0	0	0	0	0	0	0
ENSG00000250132	AC004803.1	32	72	29	0	39	38	35
ENSG00000266076	AC004805.1	2	2	0	0	0	0	0
ENSG00000270870	AC004805.2	0	0	0	0	0	0	0
ENSG00000271587	AC004805.3	0	0	0	0	0	0	0
ENSG00000280958	AC004808.1	0	0	0	0	0	0	0
ENSG00000281008	AC004808.2	0	0	0	0	0	0	0
ENSG00000255575	AC004812.1	0	0	0	0	3	0	0
ENSG00000277283	AC004812.2	33	31	18	0	17	33	49
ENSG00000278250	AC004815.1	0	8	3	2	2	3	12
ENSG00000259153	AC004816.1	2	4	5	0	8	3	2
ENSG00000275630	AC004816.2	1	2	0	0	1	2	0
ENSG00000258517	AC004817.1	0	0	0	0	0	0	0
ENSG00000259907	AC004817.2	1	0	0	0	0	0	0
ENSG00000269927	AC004817.3	0	3	0	0	1	1	1
ENSG00000269945	AC004817.4	0	0	0	0	0	0	0
ENSG00000286423	AC004817.5	3	30	3	0	4	34	35
ENSG00000258431	AC004825.1	0	0	0	0	0	0	0
ENSG00000274818	AC004825.2	9	0	8	0	3	8	4
ENSG00000287643	AC004825.3	0	1	0	0	1	2	0
ENSG00000258871	AC004828.1	0	0	0	0	1	1	3
ENSG00000286333	AC004828.2	2	0	0	0	0	0	1
ENSG00000201133	AC004830.1	0	0	0	0	0	0	0
ENSG00000228204	AC004830.2	0	1	0	0	0	0	0
ENSG00000181123	AC004832.1	0	1	1	0	0	0	0
ENSG00000230137	AC004832.2	0	0	0	0	0	0	0
ENSG00000249590	AC004832.3	0	0	0	0	0	0	0
ENSG00000272689	AC004832.4	10	6	12	0	25	10	11
ENSG00000273350	AC004832.5	19	116	43	0	42	19	109
ENSG00000273428	AC004832.6	3	5	3	0	1	1	10
ENSG00000284523	AC004834.1	7	19	18	0	15	28	24
ENSG00000230392	AC004835.1	0	0	0	0	0	0	0
ENSG00000270625	AC004835.2	0	0	0	0	0	0	0
ENSG00000280439	AC004836.1	0	0	0	0	0	0	0
ENSG00000106540	AC004837.1	0	0	0	0	0	0	0
ENSG00000228554	AC004837.2	0	0	0	0	0	0	0
ENSG00000231951	AC004837.3	0	2	0	0	0	0	0
ENSG00000287584	AC004837.4	11	69	18	0	40	19	47
ENSG00000238832	AC004839.1	12	5	10	0	14	6	7
ENSG00000272854	AC004839.2	0	4	1	0	0	1	3
ENSG00000230914	AC004840.1	1	4	3	0	1	2	2
ENSG00000271163	AC004840.2	0	2	0	0	0	0	0
ENSG00000258376	AC004846.1	2	13	5	0	17	1	10
ENSG00000258944	AC004846.2	10	45	21	0	19	12	55
ENSG00000260997	AC004847.1	6	43	3	1	40	10	9
ENSG00000251728	AC004849.1	1	6	3	0	18	7	21
ENSG00000271526	AC004852.1	0	0	0	0	0	0	0
ENSG00000278254	AC004852.2	0	0	0	0	0	0	0
ENSG00000278446	AC004852.3	0	0	0	0	0	0	0
ENSG00000270729	AC004853.1	0	0	2	0	0	0	0
ENSG00000230160	AC004854.1	2	12	8	0	3	9	4
ENSG00000272768	AC004854.2	14	38	7	0	7	17	39
ENSG00000259109	AC004858.1	0	7	5	0	17	1	6
ENSG00000232667	AC004862.1	88	72	270	0	82	352	153
ENSG00000286407	AC004863.1	0	0	0	0	0	0	0
ENSG00000236274	AC004865.1	0	0	0	0	0	0	0
ENSG00000239636	AC004865.2	8	1	14	0	12	2	0
ENSG00000223514	AC004866.1	0	0	0	0	0	0	0
ENSG00000224134	AC004866.2	0	0	0	0	0	0	0
ENSG00000230680	AC004869.1	0	0	0	0	0	0	0
ENSG00000240355	AC004869.2	0	0	0	0	0	0	0
ENSG00000214754	AC004870.1	0	0	0	0	0	0	0
ENSG00000223829	AC004870.2	0	0	0	0	0	0	0
ENSG00000229192	AC004870.3	0	0	0	0	1	0	0
ENSG00000232072	AC004870.4	0	0	0	0	0	0	0
ENSG00000227743	AC004875.1	0	0	0	0	0	0	0
ENSG00000273419	AC004877.1	0	3	2	0	0	0	3
ENSG00000280149	AC004877.2	3	36	11	0	26	20	23
ENSG00000212422	AC004879.1	0	0	0	0	0	0	0
ENSG00000286639	AC004879.2	1	2	2	0	0	3	0
ENSG00000200976	AC004882.1	0	0	0	0	0	0	0
ENSG00000232396	AC004882.2	0	0	0	0	0	0	0
ENSG00000239446	AC004882.3	0	0	0	0	0	0	0
ENSG00000287967	AC004882.4	2	6	0	0	2	1	0
ENSG00000213361	AC004884.1	0	0	0	0	0	0	0
ENSG00000242154	AC004884.2	0	0	0	0	0	0	0
ENSG00000231295	AC004888.1	0	0	0	0	0	0	0
ENSG00000239719	AC004890.1	2	3	1	0	0	3	0
ENSG00000244560	AC004890.2	25	81	97	0	61	38	77
ENSG00000271664	AC004890.3	0	0	0	0	0	0	0
ENSG00000238109	AC004893.1	0	0	0	0	0	1	1
ENSG00000284840	AC004893.2	0	0	0	0	0	0	0
ENSG00000286305	AC004893.3	0	2	2	0	2	0	3
ENSG00000231704	AC004895.1	0	2	1	0	1	2	6
ENSG00000236018	AC004898.1	0	2	0	0	1	2	0
ENSG00000225705	AC004899.1	0	0	0	0	0	0	0
ENSG00000279578	AC004899.2	0	0	0	0	0	0	0
ENSG00000285518	AC004900.1	2	0	0	0	0	0	0
ENSG00000272240	AC004908.1	0	0	0	0	9	3	9
ENSG00000272812	AC004908.2	6	38	16	0	18	11	23
ENSG00000273402	AC004908.3	3	0	5	0	18	3	2
ENSG00000252374	AC004909.1	0	0	0	0	0	0	0
ENSG00000228429	AC004910.1	0	0	0	0	0	0	0
ENSG00000226592	AC004911.1	0	0	0	0	0	0	0
ENSG00000238906	AC004912.1	0	0	0	0	0	0	0
ENSG00000243797	AC004917.1	1	3	2	0	1	8	12
ENSG00000244701	AC004918.1	20	54	55	0	75	30	55
ENSG00000270157	AC004918.5	32	204	64	0	113	75	170
ENSG00000236046	AC004920.1	0	0	0	0	0	0	0
ENSG00000273341	AC004921.1	6	8	9	0	1	3	2
ENSG00000287519	AC004921.2	0	2	0	0	1	0	0
ENSG00000284292	AC004922.1	0	19	8	0	14	6	4
ENSG00000254610	AC004923.1	0	0	2	0	1	1	0
ENSG00000254850	AC004923.2	0	0	1	0	0	0	0
ENSG00000255230	AC004923.3	0	0	0	0	0	0	0
ENSG00000255306	AC004923.4	2	4	5	0	12	2	12
ENSG00000279419	AC004925.1	3	6	13	0	5	59	26
ENSG00000241324	AC004930.1	0	0	0	0	1	0	0
ENSG00000287409	AC004936.1	0	0	0	0	0	0	0
ENSG00000225443	AC004938.1	0	6	0	0	1	0	0
ENSG00000287574	AC004938.2	15	10	6	0	2	2	1
ENSG00000228151	AC004941.1	0	9	0	0	1	8	28
ENSG00000231397	AC004941.2	0	0	0	0	0	0	0
ENSG00000259209	AC004943.1	1	6	5	0	7	6	11
ENSG00000259768	AC004943.2	46	76	34	0	65	115	111
ENSG00000279206	AC004943.3	2	0	0	0	1	3	2
ENSG00000253510	AC004944.1	0	0	0	0	0	0	0
ENSG00000222024	AC004945.1	0	0	0	0	0	0	0
ENSG00000233417	AC004946.1	0	0	0	0	0	0	0
ENSG00000233969	AC004946.2	0	0	0	0	0	0	0
ENSG00000233760	AC004947.1	0	0	0	0	0	0	0
ENSG00000280255	AC004947.2	2	2	1	0	10	0	1
ENSG00000286507	AC004947.3	1	5	1	0	4	2	6
ENSG00000272745	AC004948.1	0	1	3	0	1	4	3
ENSG00000283117	AC004949.1	0	0	0	0	0	4	14
ENSG00000228434	AC004951.1	30	181	89	0	85	97	155
ENSG00000239556	AC004951.2	7	56	10	0	15	21	39
ENSG00000241057	AC004951.3	0	6	4	0	1	5	10
ENSG00000273432	AC004951.4	4	7	12	0	15	4	10
ENSG00000233683	AC004965.1	0	0	0	0	0	0	0
ENSG00000200857	AC004966.1	0	0	0	0	0	0	0
ENSG00000243554	AC004967.1	1	1	3	0	6	4	0
ENSG00000285725	AC004967.2	8	35	14	0	46	18	51
ENSG00000238358	AC004969.1	0	4	0	0	0	2	4
ENSG00000279326	AC004972.1	0	0	0	0	0	0	0
ENSG00000226661	AC004973.1	0	2	1	0	0	0	2
ENSG00000285612	AC004974.1	1	0	1	0	0	0	3
ENSG00000224629	AC004975.1	0	0	0	0	0	0	0
ENSG00000229660	AC004975.2	0	0	0	0	0	0	0
ENSG00000205485	AC004980.1	51	173	131	0	71	87	127
ENSG00000214243	AC004980.2	0	0	0	0	0	0	0
ENSG00000230305	AC004980.3	2	1	2	0	0	6	2
ENSG00000238560	AC004980.4	0	0	0	0	0	0	0
ENSG00000250778	AC004980.5	0	4	0	0	0	0	0
ENSG00000272732	AC004982.1	6	15	12	0	24	25	45
ENSG00000272894	AC004982.2	13	79	29	0	35	74	99
ENSG00000227573	AC004986.1	0	0	0	0	0	0	0
ENSG00000231198	AC004987.1	0	0	0	0	0	0	0
ENSG00000233225	AC004987.2	9	9	6	0	6	11	11
ENSG00000237251	AC004987.3	0	0	0	0	0	0	0
ENSG00000270797	AC004987.4	0	0	0	0	0	0	0
ENSG00000203446	AC004988.1	1	1	0	0	3	0	1
ENSG00000232756	AC004990.1	0	4	0	0	0	0	0
ENSG00000248751	AC004997.1	0	0	0	0	0	0	0
ENSG00000228532	AC005000.1	2	2	1	0	1	0	0
ENSG00000270431	AC005000.2	1	4	4	0	2	3	0
ENSG00000224314	AC005002.1	0	0	0	0	0	0	0
ENSG00000238066	AC005002.2	0	0	0	0	0	0	0
ENSG00000214125	AC005005.1	0	0	0	0	0	0	0
ENSG00000235573	AC005005.2	0	0	0	0	0	0	0
ENSG00000273387	AC005005.3	7	12	2	0	7	2	3
ENSG00000278920	AC005005.4	10	3	2	3	0	3	8
ENSG00000223831	AC005006.1	0	0	0	0	0	0	0
ENSG00000226671	AC005008.1	0	0	0	0	0	0	0
ENSG00000237896	AC005008.2	0	0	0	0	0	0	0
ENSG00000231255	AC005009.1	1	0	0	0	0	0	0
ENSG00000235581	AC005011.1	0	0	0	0	0	0	0
ENSG00000228421	AC005013.1	6	11	3	0	5	5	3
ENSG00000224280	AC005014.1	1	7	2	0	0	3	0
ENSG00000272361	AC005014.2	1	8	5	0	7	4	8
ENSG00000272537	AC005014.3	0	0	0	0	3	2	0
ENSG00000287799	AC005014.4	0	0	0	0	0	0	0
ENSG00000213875	AC005019.1	0	0	0	0	0	0	0
ENSG00000224330	AC005019.2	0	0	0	0	0	0	0
ENSG00000224448	AC005020.1	1	0	0	0	0	0	0
ENSG00000272647	AC005020.2	0	0	0	0	0	0	0
ENSG00000273138	AC005021.1	14	16	34	0	15	67	49
ENSG00000233872	AC005033.1	0	0	0	0	0	0	0
ENSG00000221638	AC005034.1	0	0	0	0	0	0	0
ENSG00000230477	AC005034.2	0	0	0	0	0	0	0
ENSG00000270462	AC005034.3	0	0	0	0	0	0	0
ENSG00000270696	AC005034.4	0	0	0	0	0	0	0
ENSG00000270996	AC005034.5	3	5	0	0	1	2	5
ENSG00000271452	AC005034.6	27	22	15	0	32	34	14
ENSG00000286045	AC005034.7	1	5	4	0	0	16	6
ENSG00000183308	AC005037.1	1	6	12	0	7	12	8
ENSG00000252759	AC005037.2	13	34	28	0	55	28	39
ENSG00000226905	AC005040.1	0	0	0	0	0	0	0
ENSG00000286218	AC005040.2	0	0	0	0	0	0	0
ENSG00000159239	AC005041.1	1	0	1	0	3	3	4
ENSG00000234521	AC005041.2	0	0	0	0	0	1	0
ENSG00000272183	AC005041.3	10	59	8	0	4	5	40
ENSG00000286623	AC005041.4	1	0	3	0	5	1	0
ENSG00000286883	AC005041.5	5	4	4	0	0	3	0
ENSG00000227331	AC005042.1	16	42	22	0	37	23	40
ENSG00000228586	AC005042.2	0	0	0	0	1	1	0
ENSG00000231675	AC005042.3	0	0	0	0	0	0	0
ENSG00000273623	AC005045.1	0	0	0	0	0	0	0
ENSG00000276185	AC005045.2	0	0	0	0	0	0	0
ENSG00000238297	AC005046.1	0	3	2	0	4	2	21
ENSG00000273055	AC005046.2	2	16	12	0	6	10	4
ENSG00000202035	AC005049.1	0	0	0	0	0	0	2
ENSG00000267052	AC005050.1	2	8	7	0	11	55	41
ENSG00000286013	AC005050.2	0	9	0	0	4	4	3
ENSG00000286076	AC005050.3	3	4	6	0	5	55	71
ENSG00000279601	AC005052.1	0	0	0	0	1	0	0
ENSG00000286366	AC005052.2	16	29	9	0	12	37	41
ENSG00000243004	AC005062.1	2	3	3	0	13	0	4
ENSG00000234715	AC005064.1	0	4	4	0	2	0	1
ENSG00000251852	AC005064.2	0	0	0	0	0	0	0
ENSG00000252047	AC005064.3	0	0	1	0	1	0	0
ENSG00000273978	AC005066.1	0	0	1	0	0	0	0
ENSG00000270764	AC005070.1	0	0	0	0	0	0	0
ENSG00000271482	AC005070.2	0	0	0	0	0	0	0
ENSG00000272918	AC005070.3	12	20	27	0	43	29	32
ENSG00000201913	AC005071.1	1	0	0	0	0	1	1
ENSG00000287631	AC005071.2	1	6	0	0	0	0	2
ENSG00000272219	AC005072.1	36	176	79	0	56	33	139
ENSG00000200397	AC005076.1	0	7	2	0	11	4	7
ENSG00000224046	AC005076.2	4	1	10	0	4	8	15
ENSG00000278236	AC005076.3	7	11	2	0	9	2	10
ENSG00000213549	AC005077.1	2	25	81	0	30	0	12
ENSG00000224273	AC005077.2	14	77	207	0	116	2	19
ENSG00000228829	AC005077.3	0	0	0	0	0	0	0
ENSG00000230882	AC005077.4	79	405	332	23	129	247	519
ENSG00000287815	AC005081.1	0	4	0	0	2	0	0
ENSG00000226816	AC005082.1	6	7	8	0	18	4	3
ENSG00000285926	AC005082.2	0	0	0	0	0	0	0
ENSG00000233834	AC005083.1	5	2	4	0	14	0	3
ENSG00000271330	AC005084.1	0	0	0	0	0	0	0
ENSG00000252824	AC005086.1	0	0	0	0	0	0	0
ENSG00000261535	AC005086.2	0	0	0	0	0	0	1
ENSG00000279724	AC005086.3	0	0	1	0	0	0	0
ENSG00000280004	AC005086.4	0	0	0	0	0	0	0
ENSG00000280404	AC005086.5	0	0	0	0	0	0	0
ENSG00000278586	AC005088.1	0	0	0	0	0	0	0
ENSG00000274080	AC005089.1	176	1553	381	10	202	347	1144
ENSG00000231418	AC005090.1	0	0	0	0	0	0	0
ENSG00000229893	AC005091.1	3	18	2	0	4	3	4
ENSG00000229949	AC005094.1	0	0	0	0	0	0	0
ENSG00000259294	AC005096.1	0	0	0	0	0	0	0
ENSG00000226624	AC005099.1	0	0	0	0	0	0	0
ENSG00000260951	AC005100.1	0	0	0	0	0	11	8
ENSG00000285960	AC005100.2	0	0	0	0	1	24	5
ENSG00000219039	AC005102.1	0	0	0	0	0	0	0
ENSG00000223374	AC005104.1	0	2	0	0	1	0	1
ENSG00000224232	AC005104.2	7	24	40	0	16	8	9
ENSG00000288080	AC005104.3	0	0	0	0	0	0	0
ENSG00000225286	AC005105.1	0	1	0	0	0	0	0
ENSG00000283517	AC005144.1	0	0	1	0	0	0	0
ENSG00000286658	AC005153.1	0	2	0	0	1	0	2
ENSG00000226874	AC005154.1	1	5	0	0	0	1	10
ENSG00000244480	AC005154.2	20	86	32	0	33	38	103
ENSG00000263683	AC005154.3	0	0	0	0	0	0	0
ENSG00000264520	AC005154.4	0	16	3	0	1	0	8
ENSG00000281039	AC005154.5	0	0	0	0	0	0	0
ENSG00000278819	AC005156.1	4	6	0	0	6	0	6
ENSG00000227658	AC005160.1	19	35	21	0	16	16	34
ENSG00000233517	AC005162.1	5	20	5	0	7	1	14
ENSG00000272568	AC005162.2	8	63	10	0	14	13	55
ENSG00000223561	AC005165.1	0	10	0	0	19	1	9
ENSG00000239622	AC005165.2	0	0	0	0	0	0	0
ENSG00000287096	AC005165.3	0	0	0	0	0	0	0
ENSG00000268153	AC005176.1	0	0	0	0	0	0	0
ENSG00000269519	AC005176.2	0	0	0	0	0	0	0
ENSG00000251243	AC005178.1	1	15	0	0	0	0	0
ENSG00000267405	AC005180.1	1	6	0	0	3	3	6
ENSG00000267505	AC005180.2	0	0	0	0	0	0	0
ENSG00000271101	AC005181.1	0	0	0	0	0	0	0
ENSG00000271500	AC005183.1	0	0	0	0	0	0	0
ENSG00000270794	AC005185.1	0	0	0	0	0	0	0
ENSG00000229497	AC005189.1	1	0	2	0	5	1	1
ENSG00000271421	AC005191.1	0	0	0	0	0	0	0
ENSG00000269694	AC005197.1	0	0	0	0	0	1	0
ENSG00000230258	AC005208.1	0	0	0	0	0	0	0
ENSG00000263684	AC005209.1	0	0	0	0	0	0	0
ENSG00000278815	AC005219.1	0	0	0	0	0	0	0
ENSG00000236352	AC005220.1	0	0	2	0	7	0	0
ENSG00000262786	AC005224.1	0	0	0	0	1	0	0
ENSG00000266378	AC005224.2	33	157	73	0	126	42	37
ENSG00000266709	AC005224.3	75	265	98	0	130	32	80
ENSG00000258443	AC005225.1	2	1	0	0	3	3	9
ENSG00000258603	AC005225.2	37	54	33	0	27	18	37
ENSG00000258695	AC005225.3	0	3	7	0	4	8	10
ENSG00000279026	AC005225.4	24	80	17	0	61	79	38
ENSG00000213209	AC005229.1	0	0	0	0	0	0	0
ENSG00000213210	AC005229.2	0	0	0	0	0	0	0
ENSG00000270200	AC005229.3	0	0	0	0	0	3	0
ENSG00000273314	AC005229.4	34	35	24	0	37	36	25
ENSG00000287636	AC005229.5	0	0	0	0	0	0	0
ENSG00000258930	AC005230.1	0	0	0	0	0	0	0
ENSG00000285412	AC005232.1	1	0	0	0	0	0	0
ENSG00000235035	AC005234.1	0	0	0	0	0	0	0
ENSG00000286979	AC005234.2	0	0	0	0	0	0	0
ENSG00000225521	AC005237.1	0	9	9	0	3	8	12
ENSG00000235861	AC005237.2	0	0	0	0	0	0	0
ENSG00000263648	AC005244.1	7	1	11	0	9	6	3
ENSG00000265400	AC005244.2	0	0	0	0	0	0	0
ENSG00000271184	AC005252.1	0	0	0	0	0	0	0
ENSG00000280125	AC005252.2	0	0	0	0	0	0	0
ENSG00000280415	AC005252.3	0	0	0	0	0	0	0
ENSG00000286209	AC005252.4	0	0	0	0	0	0	0
ENSG00000268030	AC005253.1	0	2	0	0	1	0	0
ENSG00000268983	AC005253.2	0	0	0	0	0	0	0
ENSG00000256210	AC005255.1	9	7	2	0	8	11	10
ENSG00000267073	AC005256.1	0	0	0	0	0	0	0
ENSG00000273734	AC005258.1	0	0	0	0	0	0	0
ENSG00000286880	AC005258.2	0	0	0	0	0	0	0
ENSG00000131845	AC005261.1	157	224	140	0	217	194	246
ENSG00000268205	AC005261.2	480	661	603	20	941	552	506
ENSG00000268678	AC005261.3	0	0	0	0	0	0	0
ENSG00000268713	AC005261.4	0	0	0	0	0	0	0
ENSG00000268723	AC005261.5	0	1	0	0	0	0	0
ENSG00000279541	AC005261.6	0	2	1	0	0	0	0
ENSG00000266944	AC005262.1	0	0	0	0	0	0	0
ENSG00000267139	AC005262.2	0	0	8	0	0	3	6
ENSG00000267551	AC005264.1	1	2	0	0	2	4	1
ENSG00000280168	AC005274.1	0	0	0	0	0	0	0
ENSG00000263707	AC005277.1	0	8	6	0	5	4	4
ENSG00000277621	AC005277.2	0	0	0	0	0	0	0
ENSG00000251393	AC005280.1	46	133	92	0	51	84	134
ENSG00000284930	AC005280.2	1	3	5	0	3	6	4
ENSG00000285006	AC005280.3	0	0	0	0	0	0	0
ENSG00000225606	AC005281.1	0	0	0	0	0	0	0
ENSG00000266469	AC005288.1	7	23	8	0	9	11	7
ENSG00000264067	AC005291.1	0	2	0	0	0	0	0
ENSG00000273388	AC005291.2	0	0	0	0	1	1	1
ENSG00000285555	AC005293.1	0	0	0	0	0	0	0
ENSG00000256835	AC005294.1	1	0	0	0	0	0	0
ENSG00000274923	AC005296.1	0	1	2	0	1	1	5
ENSG00000227511	AC005297.1	0	0	0	0	0	0	0
ENSG00000232644	AC005297.2	0	0	0	0	0	0	0
ENSG00000237171	AC005297.3	0	0	0	0	0	0	0
ENSG00000236325	AC005300.1	0	6	0	0	0	0	1
ENSG00000273244	AC005301.1	0	0	0	0	0	0	0
ENSG00000288024	AC005301.2	0	0	0	0	0	0	0
ENSG00000273098	AC005303.1	0	0	0	0	0	0	0
ENSG00000233852	AC005304.1	2	4	8	0	8	11	4
ENSG00000265494	AC005304.2	1	0	0	0	0	0	0
ENSG00000266744	AC005304.3	6	32	20	0	18	26	24
ENSG00000267283	AC005306.1	10	43	34	0	25	16	26
ENSG00000260725	AC005307.1	0	0	0	0	1	0	0
ENSG00000214970	AC005323.1	0	0	0	0	0	0	0
ENSG00000272736	AC005323.2	0	0	0	0	0	0	0
ENSG00000233002	AC005324.1	0	0	0	0	0	0	0
ENSG00000233193	AC005324.2	0	0	0	0	0	0	0
ENSG00000251537	AC005324.3	17	37	1	0	0	2	12
ENSG00000255104	AC005324.4	0	0	0	0	0	0	0
ENSG00000266261	AC005324.5	3	3	0	0	0	1	0
ENSG00000267227	AC005324.6	0	0	0	0	0	0	0
ENSG00000226744	AC005326.1	0	0	0	0	0	0	0
ENSG00000248015	AC005329.1	22	131	50	0	48	33	317
ENSG00000267755	AC005329.2	1	2	0	0	0	0	0
ENSG00000280486	AC005329.3	1	4	0	0	0	1	2
ENSG00000267372	AC005330.1	0	0	2	0	0	0	0
ENSG00000265100	AC005332.1	6	21	10	0	6	7	5
ENSG00000267731	AC005332.2	7	25	26	0	62	17	28
ENSG00000274561	AC005332.3	46	36	60	0	92	29	55
ENSG00000274712	AC005332.4	18	29	10	0	79	7	20
ENSG00000277476	AC005332.5	59	151	100	0	117	102	152
ENSG00000278730	AC005332.6	625	679	570	24	818	496	499
ENSG00000278740	AC005332.7	2	7	6	0	30	5	12
ENSG00000267056	AC005336.1	581	560	419	8	248	465	355
ENSG00000267218	AC005336.2	0	0	0	0	0	0	0
ENSG00000279717	AC005336.3	2	0	1	0	0	5	0
ENSG00000268565	AC005339.1	0	7	2	0	12	5	8
ENSG00000263252	AC005341.1	0	0	0	0	0	0	0
ENSG00000203593	AC005342.1	1	4	0	0	1	0	1
ENSG00000256706	AC005342.2	0	0	1	0	0	2	1
ENSG00000285627	AC005343.1	0	0	0	0	0	0	0
ENSG00000287698	AC005343.4	0	2	0	0	0	0	0
ENSG00000278255	AC005344.1	0	0	0	0	0	0	0
ENSG00000236160	AC005345.1	0	0	0	0	0	0	0
ENSG00000248493	AC005351.1	1	15	24	0	11	6	16
ENSG00000250994	AC005355.1	0	0	0	0	0	0	0
ENSG00000280420	AC005355.2	1	0	0	0	0	0	6
ENSG00000266906	AC005357.1	0	0	0	0	0	0	0
ENSG00000267623	AC005357.2	1	15	1	0	1	0	4
ENSG00000265489	AC005358.1	0	0	0	0	0	0	0
ENSG00000255513	AC005363.1	0	0	0	0	0	0	0
ENSG00000277602	AC005363.2	1	3	2	0	1	1	4
ENSG00000270512	AC005377.1	0	0	0	0	2	0	0
ENSG00000267159	AC005379.1	0	2	0	0	0	0	1
ENSG00000267243	AC005381.1	0	0	0	0	0	0	0
ENSG00000275024	AC005383.1	0	0	0	0	0	0	0
ENSG00000268938	AC005387.1	0	0	0	0	0	0	0
ENSG00000269191	AC005387.2	0	0	0	0	0	0	0
ENSG00000252305	AC005389.1	0	1	1	0	0	1	2
ENSG00000275162	AC005391.1	2	20	4	0	2	1	6
ENSG00000227606	AC005392.1	0	0	0	0	0	6	1
ENSG00000231412	AC005392.2	0	0	0	0	1	0	0
ENSG00000272396	AC005392.3	0	0	0	0	0	0	0
ENSG00000276445	AC005393.1	0	10	3	0	12	1	7
ENSG00000266893	AC005394.1	0	0	0	0	0	0	0
ENSG00000283403	AC005394.2	1	0	0	0	0	0	0
ENSG00000287249	AC005400.1	5	1	8	0	7	12	1
ENSG00000241185	AC005410.1	0	0	2	0	1	0	3
ENSG00000266368	AC005410.2	1	1	0	0	5	3	9
ENSG00000264050	AC005412.1	0	0	0	0	0	0	0
ENSG00000285734	AC005414.1	1	0	0	0	0	0	0
ENSG00000259079	AC005476.1	0	0	0	0	0	2	0
ENSG00000259146	AC005476.2	12	21	27	17	15	29	20
ENSG00000200298	AC005477.1	0	0	0	0	0	0	0
ENSG00000259005	AC005479.1	6	19	6	0	18	9	17
ENSG00000270000	AC005479.2	2	20	9	0	20	3	4
ENSG00000258891	AC005480.1	2	7	6	0	5	6	18
ENSG00000279461	AC005480.2	0	0	0	0	0	0	1
ENSG00000222012	AC005481.1	0	0	1	0	4	1	0
ENSG00000233423	AC005482.1	0	2	0	0	5	0	0
ENSG00000243018	AC005486.1	0	0	0	0	0	0	4
ENSG00000225647	AC005487.1	1	4	0	0	3	42	47
ENSG00000278873	AC005495.1	28	52	76	0	43	28	42
ENSG00000285931	AC005495.2	0	0	0	0	0	0	0
ENSG00000267224	AC005498.1	0	2	1	0	0	2	3
ENSG00000267421	AC005498.2	0	1	0	0	7	1	2
ENSG00000269696	AC005498.3	2	20	15	0	4	3	11
ENSG00000279599	AC005514.1	2	45	24	0	19	15	47
ENSG00000226025	AC005515.1	15	24	4	0	0	2	3
ENSG00000269460	AC005515.2	0	0	0	0	0	0	0
ENSG00000230190	AC005518.1	0	0	0	0	0	0	0
ENSG00000270634	AC005518.2	0	0	0	0	0	0	0
ENSG00000258559	AC005519.1	14	74	28	0	46	15	68
ENSG00000199472	AC005520.1	0	0	0	0	0	0	1
ENSG00000223300	AC005520.2	0	0	0	0	0	0	0
ENSG00000258653	AC005520.3	3	14	1	0	8	4	4
ENSG00000259065	AC005520.4	35	64	46	0	34	23	52
ENSG00000270140	AC005520.5	7	12	9	0	18	5	9
ENSG00000270576	AC005520.6	0	0	0	0	0	2	3
ENSG00000273711	AC005520.7	6	5	8	0	8	4	1
ENSG00000213296	AC005521.1	0	0	0	0	0	0	0
ENSG00000250614	AC005522.1	0	0	0	0	0	0	0
ENSG00000268536	AC005523.1	1	0	1	0	0	0	0
ENSG00000269604	AC005523.2	3	1	0	0	1	3	6
ENSG00000283269	AC005524.1	0	0	0	0	0	0	0
ENSG00000234208	AC005529.1	3	7	5	0	4	3	13
ENSG00000253183	AC005531.1	0	0	0	0	0	0	0
ENSG00000230825	AC005532.1	6	24	10	0	16	45	42
ENSG00000244167	AC005532.2	1	1	1	0	0	1	0
ENSG00000224903	AC005534.1	29	126	65	0	49	98	121
ENSG00000234450	AC005534.2	0	0	0	0	0	2	0
ENSG00000201933	AC005537.1	0	0	0	3	0	0	0
ENSG00000232006	AC005537.2	0	3	0	0	8	0	10
ENSG00000237581	AC005538.1	0	0	0	0	0	0	0
ENSG00000279809	AC005538.2	0	0	0	0	0	0	0
ENSG00000286059	AC005538.3	12	28	13	0	19	1	5
ENSG00000228937	AC005539.1	0	0	0	0	0	0	2
ENSG00000235852	AC005540.1	0	4	0	0	1	1	1
ENSG00000264491	AC005544.1	0	0	0	0	0	0	0
ENSG00000265664	AC005544.2	0	0	1	0	1	0	3
ENSG00000266897	AC005546.1	2	24	7	0	12	4	12
ENSG00000285541	AC005548.1	0	0	0	0	0	0	0
ENSG00000264990	AC005549.1	0	0	0	0	0	0	0
ENSG00000225974	AC005550.1	0	0	0	0	0	0	0
ENSG00000237070	AC005550.2	4	0	0	36	5	0	1
ENSG00000284638	AC005551.1	0	0	0	0	0	0	0
ENSG00000264174	AC005552.1	0	1	0	0	0	0	0
ENSG00000267036	AC005559.1	0	0	0	0	0	0	0
ENSG00000214719	AC005562.1	3	10	6	13	7	13	7
ENSG00000273609	AC005562.2	2	0	0	0	0	0	0
ENSG00000280247	AC005578.1	1	0	0	0	0	1	12
ENSG00000267320	AC005580.1	0	2	0	0	0	0	0
ENSG00000240449	AC005586.1	3	0	1	0	3	1	2
ENSG00000261305	AC005586.2	8	10	2	0	12	6	26
ENSG00000216917	AC005587.1	0	0	0	0	0	0	0
ENSG00000226509	AC005588.1	0	0	0	0	0	0	0
ENSG00000261757	AC005592.1	0	2	5	0	2	0	0
ENSG00000287203	AC005592.2	0	0	0	0	0	0	0
ENSG00000279584	AC005593.1	2	3	4	0	3	0	3
ENSG00000287884	AC005594.1	0	0	1	0	1	2	5
ENSG00000267223	AC005597.1	0	0	0	0	0	0	0
ENSG00000287154	AC005599.1	0	0	0	0	1	0	4
ENSG00000260107	AC005606.1	0	0	0	10	1	0	1
ENSG00000261790	AC005606.2	0	0	1	0	1	0	0
ENSG00000278901	AC005609.1	0	0	1	0	0	3	1
ENSG00000278907	AC005609.2	0	0	0	0	0	0	1
ENSG00000278915	AC005609.3	0	0	0	0	3	9	0
ENSG00000278946	AC005609.4	0	0	2	0	1	0	0
ENSG00000279726	AC005609.5	0	1	0	0	6	0	0
ENSG00000269296	AC005614.1	2	5	2	0	0	1	0
ENSG00000269749	AC005614.2	0	0	0	0	0	0	0
ENSG00000267423	AC005616.1	0	0	1	0	0	0	0
ENSG00000272070	AC005618.1	6	18	9	0	12	28	61
ENSG00000279855	AC005618.2	0	0	0	0	3	0	0
ENSG00000280026	AC005618.3	0	0	0	0	0	0	0
ENSG00000288095	AC005618.4	4	5	6	0	2	30	13
ENSG00000275642	AC005619.1	0	0	0	0	0	0	0
ENSG00000283525	AC005622.1	0	0	0	0	0	0	0
ENSG00000266963	AC005625.1	0	0	0	0	0	0	0
ENSG00000253088	AC005631.1	0	0	0	0	0	0	0
ENSG00000252798	AC005632.1	0	0	0	0	0	0	0
ENSG00000257639	AC005632.2	0	0	0	0	0	2	0
ENSG00000261596	AC005632.3	9	28	31	0	66	20	36
ENSG00000271609	AC005632.4	0	0	0	0	0	0	0
ENSG00000273956	AC005632.5	0	0	0	0	0	0	0
ENSG00000287809	AC005632.6	4	10	1	0	0	3	4
ENSG00000261886	AC005670.1	1	1	1	0	0	2	6
ENSG00000262633	AC005670.2	0	0	0	0	0	0	0
ENSG00000262879	AC005670.3	403	714	484	0	591	545	599
ENSG00000250413	AC005674.1	2	2	19	0	10	7	2
ENSG00000261490	AC005674.2	34	159	56	0	195	44	58
ENSG00000226329	AC005682.1	8	12	31	0	11	0	5
ENSG00000286703	AC005682.2	0	1	0	0	1	0	1
ENSG00000278860	AC005691.1	0	5	0	0	0	0	6
ENSG00000204990	AC005692.1	0	0	0	0	0	0	0
ENSG00000261629	AC005692.2	0	0	0	0	0	0	0
ENSG00000285841	AC005692.3	0	0	0	0	0	0	0
ENSG00000262966	AC005695.1	0	2	0	0	2	5	5
ENSG00000263708	AC005695.2	0	0	0	0	0	0	0
ENSG00000273816	AC005695.3	1	11	1	0	5	0	8
ENSG00000262050	AC005696.1	4	26	11	0	11	5	20
ENSG00000272770	AC005696.2	1	4	0	0	0	0	0
ENSG00000272911	AC005696.3	4	10	8	0	6	1	6
ENSG00000277200	AC005696.4	0	1	0	0	0	0	0
ENSG00000266202	AC005697.1	0	0	0	0	0	0	0
ENSG00000266527	AC005697.2	0	0	0	0	0	4	2
ENSG00000286589	AC005697.3	0	0	0	0	0	0	0
ENSG00000249631	AC005699.1	0	3	2	0	3	0	2
ENSG00000267318	AC005702.1	0	0	0	0	0	0	0
ENSG00000267526	AC005702.2	6	29	10	0	16	5	11
ENSG00000274378	AC005702.3	0	0	0	0	0	0	0
ENSG00000275860	AC005702.4	0	0	0	0	0	0	0
ENSG00000287664	AC005702.5	0	0	0	0	0	0	0
ENSG00000237377	AC005703.2	0	0	0	0	0	0	0
ENSG00000265445	AC005703.3	0	0	0	0	0	0	0
ENSG00000266667	AC005703.4	1	3	1	0	4	0	2
ENSG00000279567	AC005703.5	0	0	0	0	0	0	0
ENSG00000279660	AC005703.6	2	0	0	0	1	1	0
ENSG00000286792	AC005703.7	0	0	0	0	0	0	0
ENSG00000230607	AC005722.1	0	0	0	0	0	0	0
ENSG00000252349	AC005722.2	6	11	0	0	4	3	14
ENSG00000262681	AC005722.3	3	0	0	0	0	1	1
ENSG00000264785	AC005722.4	0	0	0	0	0	0	0
ENSG00000264727	AC005725.1	0	0	0	0	0	3	4
ENSG00000258472	AC005726.1	0	0	0	0	0	0	7
ENSG00000264044	AC005726.2	0	2	4	0	1	0	0
ENSG00000265168	AC005726.3	0	0	0	0	0	1	4
ENSG00000265287	AC005726.4	2	16	7	0	12	10	7
ENSG00000225681	AC005730.1	1	0	0	0	0	0	0
ENSG00000261033	AC005730.2	1	0	0	0	0	0	0
ENSG00000266126	AC005730.3	8	5	6	0	11	5	27
ENSG00000263159	AC005736.1	0	0	0	0	0	0	0
ENSG00000226040	AC005740.1	0	0	0	0	0	0	0
ENSG00000250347	AC005740.2	0	0	0	0	0	0	0
ENSG00000254099	AC005740.3	0	0	0	0	0	0	0
ENSG00000271871	AC005740.4	2	36	1	0	11	6	31
ENSG00000287726	AC005740.5	3	3	2	0	4	1	6
ENSG00000249418	AC005741.1	0	0	0	0	0	0	0
ENSG00000266934	AC005746.1	8	67	14	0	17	18	48
ENSG00000267131	AC005746.2	0	1	1	0	7	0	0
ENSG00000273982	AC005746.3	0	1	2	0	0	0	0
ENSG00000007237	AC005747.1	261	298	121	0	371	104	116
ENSG00000278925	AC005753.1	2	15	12	0	9	5	26
ENSG00000286736	AC005753.2	1	3	3	0	2	4	3
ENSG00000287527	AC005753.3	3	68	18	0	31	20	36
ENSG00000267044	AC005757.1	0	0	0	0	0	0	0
ENSG00000267630	AC005758.1	2	13	0	0	4	1	0
ENSG00000268650	AC005759.1	3	21	4	0	7	8	15
ENSG00000267471	AC005771.1	0	0	0	0	0	0	0
ENSG00000232058	AC005772.1	0	0	0	0	0	0	0
ENSG00000287307	AC005772.2	0	3	0	0	0	0	0
ENSG00000252138	AC005774.1	0	0	0	0	0	0	0
ENSG00000261198	AC005774.2	0	0	0	0	0	0	0
ENSG00000266933	AC005775.1	3	5	1	0	4	3	2
ENSG00000270802	AC005776.1	5	6	5	0	25	5	11
ENSG00000273218	AC005776.2	1	2	2	0	3	6	4
ENSG00000267148	AC005777.1	0	0	0	0	0	0	0
ENSG00000268189	AC005785.1	1	6	4	0	0	4	10
ENSG00000279203	AC005785.2	12	54	32	0	67	15	50
ENSG00000266959	AC005786.1	0	0	0	0	2	1	0
ENSG00000267231	AC005786.2	0	0	0	0	3	0	0
ENSG00000267436	AC005786.3	2	50	34	0	18	14	44
ENSG00000279590	AC005786.4	1	1	0	0	0	0	0
ENSG00000252408	AC005787.1	0	0	0	0	0	0	0
ENSG00000267090	AC005789.1	0	2	1	0	1	0	2
ENSG00000274447	AC005790.1	1	0	0	0	0	0	0
ENSG00000279617	AC005796.1	0	0	0	0	0	0	0
ENSG00000248188	AC005798.1	3	1	2	0	4	1	0
ENSG00000286629	AC005803.1	0	0	1	0	0	0	3
ENSG00000235415	AC005808.1	1	0	0	0	0	0	0
ENSG00000265702	AC005821.1	1	1	2	0	2	1	5
ENSG00000287457	AC005821.2	0	0	0	0	0	0	0
ENSG00000235554	AC005822.1	1	6	9	0	1	6	4
ENSG00000249658	AC005823.1	0	0	0	0	0	0	3
ENSG00000249982	AC005823.2	0	4	0	0	0	0	1
ENSG00000226797	AC005828.1	0	0	0	0	0	0	0
ENSG00000263501	AC005828.2	0	0	0	0	0	0	0
ENSG00000263644	AC005828.3	0	0	0	0	0	0	0
ENSG00000265282	AC005828.4	1	3	0	0	1	4	0
ENSG00000265971	AC005828.5	0	0	0	0	0	0	0
ENSG00000271749	AC005828.6	10	15	0	0	2	1	4
ENSG00000271919	AC005828.7	0	1	0	0	0	0	0
ENSG00000261575	AC005829.1	2	0	0	0	1	4	0
ENSG00000262539	AC005829.2	2	6	3	0	5	0	0
ENSG00000280202	AC005831.1	10	20	14	0	63	41	26
ENSG00000256381	AC005832.1	0	0	0	0	0	0	0
ENSG00000256748	AC005832.2	0	0	0	0	0	0	0
ENSG00000256799	AC005832.3	0	0	2	0	0	1	3
ENSG00000272921	AC005832.4	0	0	0	0	0	1	0
ENSG00000255639	AC005833.1	0	2	1	0	13	2	3
ENSG00000256988	AC005833.2	1	3	0	0	3	2	1
ENSG00000261335	AC005837.1	14	50	25	0	9	15	43
ENSG00000267168	AC005837.2	0	0	0	0	0	0	0
ENSG00000274051	AC005837.3	3	2	1	0	0	0	3
ENSG00000277382	AC005837.4	0	0	0	0	0	0	0
ENSG00000223544	AC005838.1	0	0	0	0	0	0	2
ENSG00000252129	AC005838.2	0	0	0	0	0	0	0
ENSG00000266538	AC005838.3	13	85	27	0	60	19	43
ENSG00000279089	AC005839.1	42	140	106	0	171	54	103
ENSG00000213942	AC005840.1	0	2	0	0	2	0	0
ENSG00000256433	AC005840.2	122	203	172	0	140	102	175
ENSG00000256913	AC005840.3	1	3	1	0	3	1	3
ENSG00000276718	AC005840.4	15	14	7	0	17	11	21
ENSG00000258092	AC005841.1	5	29	7	0	7	18	9
ENSG00000256862	AC005842.1	0	0	0	0	0	0	0
ENSG00000255775	AC005845.1	0	3	2	0	2	5	1
ENSG00000286997	AC005856.1	23	28	22	0	124	4	26
ENSG00000280272	AC005858.1	0	0	0	0	0	0	0
ENSG00000280364	AC005858.2	0	0	0	0	0	0	0
ENSG00000280398	AC005858.3	0	0	0	0	0	0	0
ENSG00000205325	AC005863.1	0	0	0	0	0	0	0
ENSG00000250770	AC005865.1	1	4	0	0	0	1	3
ENSG00000287712	AC005865.2	7	28	3	0	2	3	12
ENSG00000256125	AC005868.1	0	0	0	0	0	0	0
ENSG00000235198	AC005871.1	0	0	0	0	0	0	0
ENSG00000258114	AC005871.2	0	0	1	0	0	4	0
ENSG00000267207	AC005884.1	3	2	0	0	2	1	2
ENSG00000267449	AC005884.2	0	0	1	0	2	0	0
ENSG00000286386	AC005888.1	0	0	0	0	0	0	0
ENSG00000202100	AC005899.1	0	0	0	0	0	0	0
ENSG00000264083	AC005899.2	2	12	8	0	7	13	27
ENSG00000264373	AC005899.3	0	0	0	0	0	0	0
ENSG00000265139	AC005899.4	1	0	0	0	0	0	0
ENSG00000265794	AC005899.5	0	0	0	0	0	0	0
ENSG00000266385	AC005899.6	10	40	13	0	26	22	24
ENSG00000274341	AC005899.7	4	30	13	0	32	17	23
ENSG00000278668	AC005899.8	9	16	20	0	36	23	28
ENSG00000279762	AC005899.9	2	0	0	0	0	3	0
ENSG00000267137	AC005901.1	0	0	0	0	0	0	0
ENSG00000251987	AC005905.1	0	0	0	0	0	0	0
ENSG00000255996	AC005906.1	0	0	0	0	0	0	0
ENSG00000256654	AC005906.2	0	0	0	0	1	0	0
ENSG00000285523	AC005906.3	0	0	0	0	0	0	0
ENSG00000243507	AC005908.1	0	0	0	0	0	0	0
ENSG00000256691	AC005908.2	0	0	0	0	0	0	0
ENSG00000287243	AC005908.3	0	0	0	0	0	0	0
ENSG00000265425	AC005909.1	0	0	0	0	0	0	0
ENSG00000287907	AC005909.2	1	0	0	0	1	0	0
ENSG00000278356	AC005911.1	3	4	4	0	9	0	1
ENSG00000227081	AC005912.1	1	1	0	0	6	0	0
ENSG00000275850	AC005912.2	43	220	90	0	81	58	139
ENSG00000278469	AC005912.3	4	45	21	0	20	10	31
ENSG00000287886	AC005914.1	1	6	0	0	5	1	1
ENSG00000279446	AC005915.1	0	0	2	0	0	0	0
ENSG00000247011	AC005920.1	15	49	18	0	9	27	51
ENSG00000249870	AC005920.2	0	0	0	0	0	0	0
ENSG00000251665	AC005920.3	0	2	6	0	0	2	0
ENSG00000262006	AC005920.4	0	5	3	0	0	2	0
ENSG00000201340	AC005921.1	0	2	0	0	0	0	0
ENSG00000248702	AC005921.2	0	0	0	0	0	0	0
ENSG00000262967	AC005921.3	0	25	0	0	8	2	15
ENSG00000278963	AC005921.4	36	119	74	0	103	48	79
ENSG00000285829	AC005921.5	0	0	0	0	0	0	0
ENSG00000267059	AC005943.1	0	0	0	0	0	0	0
ENSG00000279009	AC005943.2	0	0	0	0	0	0	0
ENSG00000267469	AC005944.1	4	11	2	0	1	1	3
ENSG00000263199	AC005951.1	0	0	0	0	0	0	0
ENSG00000267138	AC005954.1	1	4	2	0	13	6	6
ENSG00000267205	AC005954.2	0	0	0	0	0	1	0
ENSG00000278627	AC005962.1	1	4	8	0	7	4	13
ENSG00000287337	AC005962.2	2	1	2	0	1	2	1
ENSG00000270324	AC005972.1	0	0	0	0	0	0	0
ENSG00000272164	AC005972.2	0	0	0	0	0	0	0
ENSG00000283538	AC005972.3	2	2	0	0	0	0	4
ENSG00000266869	AC005993.1	0	0	0	0	0	3	2
ENSG00000201990	AC005995.1	0	0	1	0	4	0	3
ENSG00000241456	AC005996.1	0	0	0	0	0	0	0
ENSG00000287744	AC005998.1	0	0	0	0	0	0	0
ENSG00000229403	AC005999.1	0	0	0	0	0	0	0
ENSG00000285741	AC005999.2	0	0	0	0	0	0	0
ENSG00000177418	AC006001.1	1	5	2	0	3	2	1
ENSG00000226824	AC006001.2	37	204	76	0	105	69	154
ENSG00000229180	AC006001.3	207	1059	616	45	651	617	1001
ENSG00000275400	AC006001.4	0	0	0	0	0	0	0
ENSG00000231515	AC006003.1	0	0	0	0	0	0	0
ENSG00000271611	AC006006.1	0	0	0	0	0	0	0
ENSG00000230746	AC006007.1	0	0	0	0	0	0	0
ENSG00000286912	AC006008.1	143	207	142	0	117	271	335
ENSG00000200390	AC006011.1	0	0	0	0	0	0	0
ENSG00000244563	AC006011.2	0	0	0	0	0	0	0
ENSG00000274010	AC006011.3	0	9	3	0	14	2	7
ENSG00000236531	AC006013.1	0	0	0	0	0	0	0
ENSG00000226401	AC006015.1	0	0	0	0	0	0	0
ENSG00000229591	AC006017.1	15	54	26	0	29	51	42
ENSG00000276213	AC006017.2	1	2	1	28	0	1	3
ENSG00000203335	AC006019.1	0	0	0	0	0	0	0
ENSG00000233363	AC006019.2	0	0	0	0	0	0	0
ENSG00000270114	AC006019.3	0	0	0	0	0	0	0
ENSG00000226636	AC006020.1	0	0	7	0	5	6	12
ENSG00000223419	AC006022.1	0	0	0	0	0	0	0
ENSG00000199273	AC006023.1	0	0	0	0	0	0	0
ENSG00000270577	AC006023.2	0	1	3	0	4	0	8
ENSG00000273444	AC006023.3	7	6	3	0	6	2	7
ENSG00000224785	AC006026.1	0	0	0	0	0	0	1
ENSG00000228953	AC006026.2	0	0	0	0	1	0	0
ENSG00000234286	AC006026.3	0	1	4	0	1	5	2
ENSG00000272638	AC006027.1	10	64	18	0	11	18	63
ENSG00000231357	AC006028.1	0	0	0	0	0	0	0
ENSG00000264324	AC006030.1	2	3	0	0	3	2	5
ENSG00000231916	AC006033.1	0	0	0	0	0	1	0
ENSG00000272908	AC006033.2	10	14	10	0	27	10	10
ENSG00000226442	AC006037.1	0	0	5	0	2	4	11
ENSG00000279218	AC006037.2	8	98	129	0	49	65	183
ENSG00000286130	AC006040.1	0	0	1	0	0	0	0
ENSG00000229379	AC006041.1	0	0	1	0	1	2	0
ENSG00000286376	AC006041.2	0	0	8	0	4	7	14
ENSG00000227719	AC006042.1	1	0	1	0	2	0	4
ENSG00000233264	AC006042.2	30	34	49	0	146	43	54
ENSG00000234141	AC006042.3	0	0	2	0	2	7	5
ENSG00000285892	AC006043.1	2	1	8	0	5	2	2
ENSG00000235886	AC006055.1	0	0	1	0	0	0	0
ENSG00000202318	AC006057.1	0	0	0	0	1	0	0
ENSG00000261786	AC006058.1	1	23	9	0	26	0	21
ENSG00000271192	AC006058.2	0	0	0	0	0	0	0
ENSG00000272121	AC006058.3	0	0	0	0	0	0	0
ENSG00000280435	AC006058.4	0	0	0	0	0	0	0
ENSG00000230084	AC006059.1	3	7	6	0	21	3	8
ENSG00000280571	AC006059.2	0	0	0	0	0	0	0
ENSG00000285539	AC006059.3	0	0	0	0	0	0	0
ENSG00000287417	AC006059.4	0	0	0	0	0	1	0
ENSG00000287629	AC006059.5	0	1	0	0	0	0	0
ENSG00000287171	AC006062.1	0	12	0	0	4	2	3
ENSG00000255608	AC006063.1	1	0	0	0	1	3	0
ENSG00000284513	AC006063.2	0	0	0	0	0	0	0
ENSG00000286866	AC006063.3	0	0	0	0	0	0	0
ENSG00000287835	AC006063.4	0	0	0	0	0	0	0
ENSG00000245667	AC006064.1	0	0	0	0	0	0	1
ENSG00000247853	AC006064.2	5	19	4	0	8	15	8
ENSG00000255966	AC006064.3	4	4	1	0	3	5	10
ENSG00000269968	AC006064.4	54	43	12	0	7	21	31
ENSG00000276232	AC006064.5	0	0	0	0	0	0	0
ENSG00000285238	AC006064.6	0	0	0	0	0	0	0
ENSG00000255853	AC006065.1	0	1	0	0	0	0	0
ENSG00000255900	AC006065.2	0	0	0	0	0	1	0
ENSG00000255944	AC006065.3	0	0	1	0	0	0	0
ENSG00000256732	AC006065.4	1	0	0	0	0	0	7
ENSG00000278866	AC006065.5	0	0	0	0	0	0	2
ENSG00000279171	AC006065.6	0	0	0	0	0	0	0
ENSG00000225563	AC006076.1	0	0	0	0	0	0	0
ENSG00000270892	AC006077.1	0	0	0	0	0	0	0
ENSG00000279799	AC006077.2	11	40	11	0	21	12	28
ENSG00000261938	AC006111.1	0	1	0	0	0	1	0
ENSG00000263235	AC006111.2	9	20	8	0	4	13	15
ENSG00000276754	AC006111.3	1	0	1	0	1	0	0
ENSG00000286635	AC006112.1	0	0	0	0	0	0	0
ENSG00000268407	AC006115.1	0	0	2	0	2	0	0
ENSG00000286125	AC006115.2	1	9	11	0	11	2	7
ENSG00000200646	AC006116.1	0	0	0	0	0	0	0
ENSG00000267606	AC006116.10	3	7	3	1	10	10	13
ENSG00000285996	AC006116.12	4	11	10	0	1	32	9
ENSG00000266907	AC006116.2	1	4	1	0	4	2	2
ENSG00000266932	AC006116.3	1	9	1	0	2	4	1
ENSG00000267145	AC006116.4	0	0	0	0	0	2	5
ENSG00000267192	AC006116.5	0	0	0	0	0	2	7
ENSG00000267298	AC006116.6	9	26	29	0	30	13	23
ENSG00000267429	AC006116.7	1	14	1	0	4	3	4
ENSG00000267549	AC006116.9	2	11	4	0	6	2	11
ENSG00000213970	AC006122.1	0	0	0	0	0	0	0
ENSG00000278643	AC006127.1	0	0	0	0	0	0	2
ENSG00000279716	AC006128.1	2	9	5	0	2	3	1
ENSG00000267063	AC006130.1	0	0	0	0	0	0	0
ENSG00000267398	AC006130.2	0	0	0	0	0	0	0
ENSG00000287766	AC006130.3	3	9	3	0	13	22	27
ENSG00000278813	AC006133.1	0	0	0	0	0	0	0
ENSG00000264895	AC006141.1	22	100	111	0	109	67	86
ENSG00000233433	AC006144.1	0	0	0	0	1	7	6
ENSG00000287379	AC006144.2	1	2	3	0	0	19	16
ENSG00000258660	AC006146.1	1	2	0	0	1	0	1
ENSG00000242593	AC006148.1	0	0	0	0	1	2	16
ENSG00000243574	AC006148.2	0	0	0	0	0	0	0
ENSG00000226323	AC006150.1	0	0	0	0	0	0	0
ENSG00000273299	AC006153.1	0	0	0	0	0	0	0
ENSG00000278847	AC006157.1	2	5	1	0	1	1	9
ENSG00000275310	AC006158.1	0	0	0	0	0	0	0
ENSG00000286120	AC006158.2	0	0	0	0	0	0	0
ENSG00000286173	AC006158.3	0	0	0	0	0	0	0
ENSG00000235427	AC006159.1	0	0	0	0	0	0	0
ENSG00000249502	AC006160.1	6	6	4	0	9	4	5
ENSG00000283219	AC006160.2	0	0	0	0	0	0	0
ENSG00000238090	AC006195.1	3	0	3	0	6	2	4
ENSG00000252517	AC006196.1	0	0	0	0	0	0	0
ENSG00000257128	AC006197.1	0	0	0	0	0	0	0
ENSG00000286591	AC006197.2	0	0	1	0	0	6	13
ENSG00000257629	AC006199.1	0	0	0	0	0	0	0
ENSG00000255825	AC006205.1	0	0	0	0	0	0	2
ENSG00000256020	AC006205.2	35	22	6	0	17	26	27
ENSG00000256146	AC006206.1	0	2	1	0	0	0	0
ENSG00000256417	AC006206.2	3	0	5	0	0	0	0
ENSG00000283138	AC006207.1	0	1	0	0	2	0	2
ENSG00000223391	AC006210.1	0	0	0	0	0	0	0
ENSG00000238247	AC006210.2	0	0	0	0	1	0	0
ENSG00000266921	AC006213.1	6	16	10	0	8	24	18
ENSG00000267058	AC006213.2	6	17	7	0	3	9	9
ENSG00000267191	AC006213.3	1	17	7	0	4	1	8
ENSG00000277806	AC006213.4	4	8	3	0	23	20	6
ENSG00000278492	AC006213.5	2	6	1	0	16	5	12
ENSG00000278917	AC006213.6	6	4	3	0	9	6	18
ENSG00000286613	AC006213.7	4	5	4	0	3	0	3
ENSG00000287778	AC006230.1	21	67	27	0	136	13	23
ENSG00000262961	AC006236.1	0	0	0	0	0	0	0
ENSG00000271392	AC006237.1	0	3	0	0	4	1	0
ENSG00000272799	AC006238.1	1	1	3	0	0	0	1
ENSG00000285653	AC006238.2	0	0	0	0	0	0	0
ENSG00000274578	AC006249.1	16	24	22	0	68	17	17
ENSG00000243224	AC006252.1	6	13	7	0	5	11	8
ENSG00000243696	AC006254.1	618	2073	998	2	515	358	1438
ENSG00000270941	AC006254.2	0	0	0	0	0	0	0
ENSG00000271137	AC006254.3	0	0	0	0	0	0	0
ENSG00000268460	AC006262.1	1	6	27	0	3	41	76
ENSG00000269729	AC006262.2	0	0	0	0	0	0	0
ENSG00000269745	AC006262.3	0	0	0	0	0	0	0
ENSG00000277748	AC006262.4	0	0	0	0	0	0	0
ENSG00000264513	AC006270.1	0	0	0	0	0	0	0
ENSG00000264529	AC006270.2	7	12	5	0	3	2	0
ENSG00000272383	AC006270.3	0	0	0	0	0	0	0
ENSG00000268316	AC006272.1	0	0	1	0	0	0	0
ENSG00000269483	AC006272.2	0	0	0	0	0	0	0
ENSG00000272473	AC006273.1	0	0	1	0	5	10	2
ENSG00000279452	AC006277.1	0	0	1	0	0	0	0
ENSG00000260970	AC006288.1	0	0	0	0	0	0	0
ENSG00000248425	AC006296.1	0	0	0	0	4	0	0
ENSG00000251412	AC006296.2	0	0	0	0	0	0	0
ENSG00000287360	AC006296.3	0	2	0	0	2	0	1
ENSG00000246225	AC006299.1	32	51	87	0	75	80	61
ENSG00000201816	AC006305.1	0	0	0	0	0	0	0
ENSG00000206129	AC006305.2	1	1	2	0	2	0	0
ENSG00000267399	AC006305.3	0	0	0	0	0	0	0
ENSG00000267732	AC006305.4	0	0	1	0	0	0	0
ENSG00000253028	AC006320.1	0	0	0	0	0	0	0
ENSG00000230785	AC006326.1	0	0	0	0	0	0	0
ENSG00000233619	AC006328.1	0	0	0	0	0	0	0
ENSG00000284380	AC006328.2	0	0	0	0	0	0	0
ENSG00000278683	AC006329.1	0	0	0	0	0	0	2
ENSG00000280388	AC006330.1	60	280	90	19	113	115	239
ENSG00000272686	AC006333.1	55	42	55	0	52	123	36
ENSG00000235094	AC006335.1	0	0	0	0	0	0	0
ENSG00000275352	AC006335.2	0	0	0	0	0	0	0
ENSG00000278197	AC006338.1	0	0	0	0	0	0	0
ENSG00000278602	AC006338.2	0	0	0	0	0	0	0
ENSG00000286565	AC006348.1	0	8	3	0	4	18	32
ENSG00000258513	AC006349.1	1	5	1	0	3	3	8
ENSG00000229110	AC006355.1	0	0	0	0	0	0	0
ENSG00000281120	AC006355.2	0	0	0	0	0	0	0
ENSG00000230033	AC006357.1	0	0	0	0	0	0	0
ENSG00000206751	AC006360.1	0	4	2	0	8	0	3
ENSG00000261778	AC006362.1	0	0	0	0	0	0	0
ENSG00000270611	AC006363.1	0	0	0	0	0	0	0
ENSG00000287554	AC006364.1	0	1	0	0	7	0	3
ENSG00000244000	AC006366.1	0	0	0	0	0	1	0
ENSG00000236213	AC006369.1	36	153	45	0	94	31	106
ENSG00000236572	AC006369.2	0	4	0	0	5	1	2
ENSG00000223872	AC006372.1	0	0	0	0	2	3	3
ENSG00000233191	AC006372.2	0	0	4	0	4	1	1
ENSG00000234210	AC006372.3	1	4	3	0	3	8	9
ENSG00000280266	AC006372.4	0	0	0	0	0	0	0
ENSG00000278959	AC006378.1	1	8	7	0	16	10	22
ENSG00000271027	AC006380.1	0	0	0	0	0	0	0
ENSG00000274899	AC006386.1	0	0	0	0	0	0	0
ENSG00000279115	AC006386.2	0	0	0	0	0	0	0
ENSG00000243193	AC006387.1	0	0	0	0	0	0	0
ENSG00000251638	AC006390.1	0	0	0	0	0	0	0
ENSG00000286487	AC006398.1	0	0	0	0	2	0	0
ENSG00000248851	AC006427.1	2	10	21	0	2	2	4
ENSG00000286888	AC006427.2	15	23	33	0	6	3	22
ENSG00000262456	AC006435.1	0	1	0	0	4	0	0
ENSG00000263345	AC006435.2	13	35	7	0	11	3	20
ENSG00000274758	AC006435.3	1	2	0	0	3	1	4
ENSG00000279872	AC006435.4	0	5	1	0	0	0	1
ENSG00000280280	AC006435.5	4	17	4	0	5	4	5
ENSG00000263466	AC006441.1	0	0	0	0	0	0	0
ENSG00000265428	AC006441.2	0	0	0	0	0	0	0
ENSG00000265784	AC006441.3	2	1	0	0	1	0	0
ENSG00000266588	AC006441.4	0	0	0	0	4	0	3
ENSG00000277426	AC006441.5	0	0	0	0	0	0	0
ENSG00000252985	AC006443.1	8	48	3	22	20	7	11
ENSG00000242209	AC006445.1	0	0	1	0	0	11	16
ENSG00000249148	AC006445.2	0	0	0	0	0	2	0
ENSG00000286297	AC006445.3	0	0	0	0	0	0	0
ENSG00000274996	AC006449.1	0	0	0	0	0	0	0
ENSG00000275532	AC006449.2	10	11	3	0	3	3	3
ENSG00000275665	AC006449.3	8	9	2	0	4	0	7
ENSG00000277182	AC006449.5	9	17	0	0	2	1	2
ENSG00000277969	AC006449.7	25	27	25	0	29	11	6
ENSG00000279119	AC006449.9	6	13	5	0	5	1	10
ENSG00000231227	AC006450.1	0	0	0	0	2	0	0
ENSG00000234921	AC006450.2	0	0	0	0	0	0	0
ENSG00000236668	AC006450.3	0	0	0	0	0	0	0
ENSG00000201354	AC006452.1	0	0	0	0	0	0	0
ENSG00000285904	AC006452.2	0	2	1	0	1	0	0
ENSG00000276861	AC006453.1	0	0	0	0	0	0	0
ENSG00000283132	AC006453.2	0	0	0	0	0	0	0
ENSG00000283196	AC006453.3	10	22	3	0	6	5	19
ENSG00000283214	AC006453.4	0	0	0	0	0	0	0
ENSG00000283427	AC006453.5	0	0	0	0	0	0	0
ENSG00000283659	AC006453.6	0	0	0	0	0	0	0
ENSG00000226587	AC006455.1	0	0	0	0	0	0	0
ENSG00000227545	AC006455.2	0	0	0	0	0	0	0
ENSG00000227923	AC006455.3	0	0	0	0	0	0	0
ENSG00000229301	AC006455.4	0	0	0	0	0	0	0
ENSG00000230000	AC006455.5	0	0	0	0	0	0	0
ENSG00000232165	AC006455.6	0	0	0	0	0	0	0
ENSG00000236638	AC006455.7	0	0	0	0	0	0	0
ENSG00000244550	AC006455.8	0	0	0	0	0	0	0
ENSG00000230132	AC006457.1	0	0	0	0	0	0	0
ENSG00000227489	AC006458.1	0	0	0	0	0	0	0
ENSG00000286908	AC006459.1	0	0	0	0	0	0	0
ENSG00000228509	AC006460.1	22	50	1	0	66	4	15
ENSG00000284052	AC006460.2	30	67	59	0	75	101	119
ENSG00000228568	AC006461.1	0	0	0	0	0	0	0
ENSG00000225795	AC006463.1	0	0	0	0	0	0	0
ENSG00000232887	AC006466.1	0	0	0	0	0	0	0
ENSG00000286987	AC006478.1	0	0	0	0	0	0	0
ENSG00000287039	AC006478.2	0	0	0	0	0	0	0
ENSG00000201565	AC006480.1	0	0	0	0	1	0	0
ENSG00000228019	AC006480.2	0	0	0	0	0	0	0
ENSG00000273448	AC006480.3	14	59	38	0	59	50	88
ENSG00000228675	AC006482.1	0	0	0	0	0	0	0
ENSG00000228974	AC006483.1	1	0	1	0	0	1	0
ENSG00000272719	AC006483.2	4	11	0	0	0	7	10
ENSG00000223841	AC006484.1	0	0	0	0	0	0	0
ENSG00000268643	AC006486.1	0	0	0	0	0	0	0
ENSG00000279539	AC006486.2	8	29	19	0	12	15	22
ENSG00000249906	AC006487.1	0	0	0	0	0	1	0
ENSG00000250310	AC006487.2	0	4	0	0	0	0	4
ENSG00000248777	AC006499.1	0	0	0	0	0	0	0
ENSG00000250074	AC006499.2	0	0	0	0	0	0	0
ENSG00000250505	AC006499.3	0	0	0	0	0	0	0
ENSG00000250573	AC006499.4	0	0	0	0	0	0	0
ENSG00000251278	AC006499.5	0	0	0	0	0	0	0
ENSG00000251296	AC006499.6	0	0	0	0	0	0	0
ENSG00000251338	AC006499.7	0	0	0	0	0	0	0
ENSG00000271544	AC006499.8	0	0	0	0	0	0	0
ENSG00000261770	AC006504.1	22	117	38	0	61	47	86
ENSG00000266977	AC006504.2	1	1	0	0	0	0	0
ENSG00000267264	AC006504.3	1	10	4	0	2	4	5
ENSG00000267389	AC006504.4	6	11	0	0	0	0	0
ENSG00000267575	AC006504.5	91	201	59	0	199	108	145
ENSG00000267768	AC006504.6	0	0	0	0	0	0	0
ENSG00000281468	AC006504.7	7	3	3	0	26	6	4
ENSG00000224058	AC006509.1	0	0	0	0	0	0	0
ENSG00000224443	AC006509.2	0	0	0	0	0	3	1
ENSG00000283502	AC006509.3	0	0	0	0	0	0	0
ENSG00000206636	AC006511.1	0	0	0	0	0	0	0
ENSG00000240739	AC006511.2	0	0	0	0	0	0	0
ENSG00000255581	AC006511.3	0	0	0	0	0	0	0
ENSG00000279865	AC006511.4	11	12	5	0	9	11	2
ENSG00000282080	AC006511.5	0	7	0	0	0	0	0
ENSG00000284697	AC006511.6	1	30	10	0	14	9	20
ENSG00000288043	AC006511.7	0	0	0	0	3	0	0
ENSG00000239701	AC006512.1	0	0	0	0	0	2	0
ENSG00000257078	AC006512.2	0	0	0	0	0	0	0
ENSG00000199912	AC006517.1	0	0	0	0	0	0	0
ENSG00000201549	AC006517.2	0	0	0	0	0	0	0
ENSG00000201663	AC006517.3	0	2	0	0	0	2	6
ENSG00000241828	AC006517.4	0	0	0	0	0	0	0
ENSG00000278459	AC006517.5	0	0	1	1	0	0	0
ENSG00000287713	AC006517.6	0	0	0	0	0	0	0
ENSG00000256651	AC006518.1	8	15	23	0	42	19	37
ENSG00000256682	AC006518.2	7	31	31	0	38	31	26
ENSG00000287390	AC006525.1	0	1	0	0	1	0	0
ENSG00000240579	AC006529.1	0	0	0	0	0	0	0
ENSG00000258587	AC006530.1	0	0	1	0	0	0	1
ENSG00000261342	AC006538.1	2	2	3	0	0	1	3
ENSG00000267001	AC006538.2	0	0	0	0	0	0	0
ENSG00000276097	AC006538.3	1	18	1	0	8	3	7
ENSG00000286460	AC006538.4	0	0	0	0	0	0	0
ENSG00000240673	AC006539.1	0	0	0	0	0	0	0
ENSG00000268070	AC006539.2	0	0	0	0	0	0	0
ENSG00000274033	AC006539.3	0	0	0	0	0	0	0
ENSG00000236540	AC006547.1	0	2	2	0	0	0	1
ENSG00000243762	AC006547.2	10	19	5	0	13	1	11
ENSG00000268292	AC006547.3	0	0	0	0	0	0	0
ENSG00000277950	AC006547.4	1	4	2	0	6	1	6
ENSG00000225480	AC006548.1	0	0	0	0	0	3	6
ENSG00000270226	AC006548.2	0	0	0	0	0	0	0
ENSG00000285045	AC006548.3	0	0	0	0	0	1	0
ENSG00000267150	AC006557.1	0	0	0	0	0	0	0
ENSG00000267324	AC006557.2	0	0	0	0	5	0	3
ENSG00000267356	AC006557.3	0	0	0	0	0	0	0
ENSG00000267756	AC006557.4	0	0	0	0	0	0	0
ENSG00000270469	AC006557.5	0	0	0	0	0	0	0
ENSG00000279352	AC006557.6	0	0	1	0	0	0	0
ENSG00000273368	AC006566.1	5	17	7	0	26	9	9
ENSG00000286649	AC006566.2	0	0	0	0	1	0	0
ENSG00000257105	AC006581.1	0	0	0	0	0	0	0
ENSG00000282022	AC006581.2	0	3	1	0	1	0	0
ENSG00000206645	AC006583.1	8	15	14	0	8	22	42
ENSG00000261882	AC006600.1	0	0	0	0	0	0	0
ENSG00000279606	AC006600.2	0	0	3	0	0	0	0
ENSG00000279918	AC006840.1	0	0	0	0	0	0	0
ENSG00000275314	AC006924.1	0	4	9	0	2	0	0
ENSG00000255977	AC006927.1	0	0	0	23	0	0	0
ENSG00000284327	AC006927.2	0	0	0	0	0	0	0
ENSG00000284522	AC006927.3	0	0	0	0	0	0	0
ENSG00000284591	AC006927.4	0	0	0	0	0	0	0
ENSG00000285142	AC006927.5	1	0	0	0	0	0	2
ENSG00000269194	AC006942.1	2	15	6	0	4	1	0
ENSG00000235328	AC006946.1	0	0	0	0	0	0	0
ENSG00000273203	AC006946.2	0	2	0	0	16	0	4
ENSG00000273442	AC006946.3	0	0	0	0	5	0	0
ENSG00000229330	AC006947.1	11	17	8	0	7	3	18
ENSG00000201432	AC006960.1	1	1	2	0	0	0	0
ENSG00000234457	AC006960.2	0	9	6	0	5	2	14
ENSG00000237400	AC006960.3	0	0	0	0	1	43	8
ENSG00000260070	AC006960.4	0	1	1	0	3	6	2
ENSG00000200291	AC006963.1	0	0	0	0	0	1	3
ENSG00000279587	AC006963.2	0	0	1	0	1	2	3
ENSG00000224341	AC006965.1	0	0	0	0	0	0	0
ENSG00000229365	AC006967.1	0	0	0	0	0	0	0
ENSG00000236102	AC006967.2	0	0	0	0	0	0	0
ENSG00000269446	AC006967.3	0	0	0	0	0	0	0
ENSG00000230191	AC006970.1	0	1	0	0	0	0	0
ENSG00000233028	AC006970.2	1	0	0	0	4	0	1
ENSG00000285670	AC006970.3	0	0	0	0	0	0	0
ENSG00000218586	AC006971.1	3	1	4	1	7	9	5
ENSG00000285666	AC006972.1	0	0	0	0	1	1	0
ENSG00000283504	AC006974.1	1	2	0	0	0	0	2
ENSG00000283648	AC006974.2	0	0	0	0	0	0	0
ENSG00000235859	AC006978.1	89	138	174	0	142	124	178
ENSG00000281593	AC006978.2	2	5	10	0	11	8	20
ENSG00000251925	AC006983.1	0	0	0	0	0	0	0
ENSG00000274445	AC006986.1	0	0	0	0	0	0	0
ENSG00000278478	AC006987.1	0	0	0	0	0	0	0
ENSG00000224518	AC006989.1	0	0	0	0	0	0	0
ENSG00000231063	AC006994.1	0	0	1	0	1	6	1
ENSG00000279317	AC006994.2	6	45	57	0	13	19	49
ENSG00000201959	AC007000.1	0	0	0	0	1	0	0
ENSG00000213542	AC007000.2	4	6	6	0	3	11	13
ENSG00000225726	AC007000.3	4	19	10	0	14	9	11
ENSG00000259628	AC007000.4	1	18	12	0	14	11	8
ENSG00000267055	AC007001.1	0	0	0	0	0	0	0
ENSG00000231183	AC007003.1	0	0	0	0	0	0	0
ENSG00000244239	AC007009.1	0	0	0	0	0	0	0
ENSG00000259963	AC007012.1	0	0	0	0	0	0	0
ENSG00000278975	AC007012.2	0	0	0	0	0	0	0
ENSG00000262020	AC007014.1	0	0	0	0	0	0	0
ENSG00000274038	AC007014.2	5	17	4	0	9	3	0
ENSG00000249930	AC007016.1	1	5	9	0	5	8	23
ENSG00000206862	AC007021.1	0	0	0	0	0	0	0
ENSG00000274118	AC007027.1	0	0	0	0	0	0	0
ENSG00000201774	AC007029.1	0	0	0	0	0	0	0
ENSG00000271185	AC007029.2	0	2	4	0	1	5	2
ENSG00000273320	AC007032.1	8	10	8	0	5	22	22
ENSG00000227017	AC007036.1	0	1	0	0	0	0	0
ENSG00000230751	AC007036.2	5	29	24	0	18	30	62
ENSG00000251660	AC007036.3	0	0	0	0	0	0	0
ENSG00000283618	AC007036.4	0	0	0	0	0	0	0
ENSG00000286847	AC007036.5	0	2	1	0	0	5	3
ENSG00000272807	AC007038.1	17	39	43	0	90	36	61
ENSG00000228384	AC007040.1	0	2	0	0	0	0	0
ENSG00000258881	AC007040.2	0	4	0	0	1	1	3
ENSG00000277764	AC007040.3	0	0	0	0	1	0	0
ENSG00000235411	AC007041.1	2	8	1	0	5	3	4
ENSG00000237358	AC007064.1	0	0	0	0	0	0	0
ENSG00000237689	AC007064.2	9	16	0	0	7	29	15
ENSG00000237835	AC007064.3	0	0	0	0	0	18	39
ENSG00000283535	AC007064.4	0	0	0	0	0	2	0
ENSG00000213216	AC007066.1	0	0	0	0	0	0	0
ENSG00000261094	AC007066.2	16	37	29	0	58	42	47
ENSG00000286718	AC007066.3	0	0	0	0	0	0	0
ENSG00000213443	AC007068.1	0	0	0	0	0	0	0
ENSG00000223838	AC007091.1	0	0	2	0	2	0	0
ENSG00000285673	AC007092.1	0	0	0	0	0	0	0
ENSG00000231609	AC007098.1	3	0	3	0	1	1	1
ENSG00000237162	AC007098.2	14	105	45	0	37	24	56
ENSG00000231172	AC007099.1	8	13	3	0	0	0	0
ENSG00000237293	AC007099.2	0	0	0	0	0	0	0
ENSG00000238410	AC007099.3	0	0	0	0	0	0	0
ENSG00000271955	AC007100.1	0	8	3	0	3	0	2
ENSG00000286604	AC007100.2	0	0	0	0	0	0	0
ENSG00000251410	AC007106.1	0	0	0	0	0	1	0
ENSG00000287389	AC007106.2	0	0	0	0	0	0	0
ENSG00000263004	AC007114.1	37	33	19	0	36	30	26
ENSG00000263089	AC007114.2	0	1	0	0	0	1	0
ENSG00000258148	AC007115.1	0	0	0	0	0	0	0
ENSG00000250497	AC007126.1	0	0	0	0	0	0	0
ENSG00000229970	AC007128.1	0	0	0	0	0	0	0
ENSG00000272328	AC007128.2	0	0	0	0	0	0	0
ENSG00000286478	AC007130.1	2	3	4	0	0	23	6
ENSG00000285611	AC007132.1	0	0	0	0	0	0	0
ENSG00000267180	AC007136.1	0	0	0	0	0	0	0
ENSG00000262516	AC007151.1	0	0	0	0	0	0	0
ENSG00000261146	AC007159.1	0	0	0	0	0	0	0
ENSG00000176043	AC007160.1	0	0	0	0	0	0	0
ENSG00000234718	AC007161.1	0	0	0	0	0	1	0
ENSG00000270314	AC007161.2	0	0	0	0	0	0	0
ENSG00000283549	AC007161.3	0	0	0	0	0	0	0
ENSG00000231815	AC007179.1	0	0	0	0	0	0	0
ENSG00000233891	AC007179.2	0	2	2	0	5	0	0
ENSG00000270447	AC007179.3	0	0	0	0	0	0	0
ENSG00000224721	AC007182.1	1	7	6	0	6	29	42
ENSG00000242951	AC007182.2	0	3	0	0	7	0	1
ENSG00000280494	AC007182.3	0	0	0	0	0	0	0
ENSG00000279407	AC007191.1	60	233	49	0	120	38	64
ENSG00000268173	AC007192.1	0	6	2	0	0	0	2
ENSG00000269145	AC007192.2	0	11	2	0	0	0	0
ENSG00000268810	AC007193.1	0	4	6	0	1	7	12
ENSG00000269124	AC007193.2	0	0	0	0	0	0	1
ENSG00000269151	AC007193.3	3	1	0	0	4	3	7
ENSG00000273791	AC007204.1	0	0	0	0	0	0	0
ENSG00000274800	AC007204.2	0	0	0	0	0	0	0
ENSG00000242444	AC007207.1	0	0	0	0	0	0	0
ENSG00000242329	AC007215.1	0	0	0	0	0	0	0
ENSG00000260488	AC007216.1	0	0	0	0	0	0	0
ENSG00000261216	AC007216.2	0	0	2	0	0	0	0
ENSG00000261560	AC007216.3	15	88	45	0	59	19	27
ENSG00000263307	AC007216.4	7	18	17	0	12	6	16
ENSG00000277458	AC007216.5	0	0	0	0	0	0	2
ENSG00000260362	AC007218.1	0	0	0	0	0	3	0
ENSG00000283221	AC007218.2	0	2	4	0	0	67	26
ENSG00000287830	AC007218.3	1	6	10	0	0	142	233
ENSG00000263033	AC007220.1	10	7	11	0	6	31	17
ENSG00000287121	AC007220.2	0	1	0	0	0	0	0
ENSG00000283003	AC007221.1	17	55	147	0	29	554	392
ENSG00000283584	AC007222.1	0	0	0	0	0	0	0
ENSG00000287340	AC007222.2	0	0	0	0	0	0	0
ENSG00000260835	AC007223.1	0	0	0	0	0	0	0
ENSG00000260764	AC007224.1	0	3	0	0	0	0	0
ENSG00000279357	AC007224.2	0	14	7	0	12	1	20
ENSG00000260782	AC007225.1	0	0	0	0	4	0	2
ENSG00000261725	AC007225.2	0	0	0	0	0	0	0
ENSG00000267544	AC007229.1	2	1	4	0	1	0	1
ENSG00000226230	AC007237.1	0	0	0	0	0	0	0
ENSG00000231043	AC007238.1	15	7	6	0	9	22	12
ENSG00000206647	AC007240.1	0	0	0	0	0	0	0
ENSG00000206898	AC007240.2	3	2	6	0	1	2	6
ENSG00000285872	AC007240.3	25	33	32	0	14	46	34
ENSG00000278391	AC007241.1	0	0	0	0	0	0	0
ENSG00000282909	AC007241.2	0	0	0	0	0	0	0
ENSG00000202137	AC007242.1	0	0	0	0	0	0	0
ENSG00000273063	AC007250.1	0	0	0	0	0	0	0
ENSG00000235653	AC007253.1	0	0	0	0	0	0	0
ENSG00000223813	AC007255.1	7	3	5	0	7	3	0
ENSG00000270196	AC007255.2	0	0	0	0	0	0	0
ENSG00000213090	AC007256.1	17	72	33	0	38	17	42
ENSG00000271656	AC007262.1	0	6	9	0	4	25	37
ENSG00000284959	AC007262.2	181	485	900	16	481	1089	1235
ENSG00000287184	AC007269.1	0	0	0	0	0	0	0
ENSG00000287771	AC007271.1	16	36	14	0	11	13	26
ENSG00000232719	AC007272.1	2	0	2	0	1	0	3
ENSG00000273975	AC007272.2	0	0	0	1	3	0	0
ENSG00000223422	AC007274.1	0	0	0	0	0	0	0
ENSG00000236690	AC007274.2	0	0	0	0	0	0	0
ENSG00000275280	AC007274.3	0	0	0	0	0	0	0
ENSG00000278854	AC007275.1	0	0	0	0	0	0	0
ENSG00000213981	AC007277.1	30	22	0	0	3	3	8
ENSG00000275414	AC007277.2	0	0	0	0	0	0	0
ENSG00000234389	AC007278.1	1	19	15	0	22	23	29
ENSG00000236525	AC007278.2	1	7	10	0	18	9	8
ENSG00000230799	AC007279.1	0	0	0	0	0	0	0
ENSG00000287133	AC007279.2	5	11	4	0	7	4	6
ENSG00000234431	AC007283.1	0	0	0	0	0	0	0
ENSG00000235579	AC007283.2	0	0	0	0	0	0	0
ENSG00000251996	AC007284.1	2	13	1	0	5	0	2
ENSG00000227014	AC007285.1	3	2	3	0	3	0	4
ENSG00000231519	AC007285.2	0	0	0	0	0	0	0
ENSG00000267980	AC007292.1	5	37	19	0	12	12	16
ENSG00000269318	AC007292.2	9	88	25	0	25	16	39
ENSG00000269807	AC007292.3	1	7	0	0	8	0	7
ENSG00000257715	AC007298.1	0	2	3	0	4	3	1
ENSG00000257878	AC007298.2	20	46	70	0	39	27	44
ENSG00000272600	AC007308.1	0	0	0	0	0	0	0
ENSG00000224946	AC007312.1	0	0	0	0	0	0	0
ENSG00000234818	AC007314.1	1	0	0	0	1	0	0
ENSG00000285898	AC007317.1	0	0	0	0	0	0	0
ENSG00000287468	AC007317.2	0	0	0	0	4	0	1
ENSG00000172974	AC007318.1	9	8	5	0	7	8	0
ENSG00000272025	AC007318.2	0	0	0	0	0	0	0
ENSG00000273763	AC007318.3	13	19	20	0	14	27	18
ENSG00000224063	AC007319.1	19	22	88	0	18	91	25
ENSG00000227444	AC007322.1	0	0	0	0	0	0	0
ENSG00000229725	AC007322.2	0	0	0	0	0	0	0
ENSG00000237968	AC007322.3	0	0	0	0	0	0	0
ENSG00000251618	AC007322.4	0	0	0	0	0	0	0
ENSG00000276017	AC007325.1	0	0	0	0	0	0	0
ENSG00000277196	AC007325.2	3	3	6	0	7	2	13
ENSG00000278573	AC007325.3	0	0	0	0	0	0	0
ENSG00000278817	AC007325.4	3	6	6	0	1	12	10
ENSG00000271275	AC007326.1	0	0	0	0	0	0	0
ENSG00000280418	AC007326.2	0	0	0	0	0	0	0
ENSG00000283583	AC007326.3	0	0	0	0	0	0	0
ENSG00000283809	AC007326.4	0	0	0	0	0	0	0
ENSG00000284294	AC007326.5	0	0	0	0	0	0	0
ENSG00000228770	AC007327.1	0	0	0	0	0	0	0
ENSG00000229679	AC007327.2	0	0	0	0	0	0	0
ENSG00000260478	AC007333.1	0	0	0	0	0	0	0
ENSG00000260975	AC007333.2	0	0	0	0	0	0	0
ENSG00000261997	AC007336.1	19	30	20	0	71	14	14
ENSG00000274508	AC007336.2	0	0	3	0	1	0	1
ENSG00000279030	AC007336.3	0	7	5	0	11	3	1
ENSG00000259926	AC007342.1	14	32	14	0	33	10	27
ENSG00000259962	AC007342.2	0	0	0	0	0	0	0
ENSG00000260078	AC007342.3	0	4	0	0	12	0	0
ENSG00000261804	AC007342.4	0	1	0	0	0	0	1
ENSG00000262714	AC007342.5	1	0	0	0	3	0	0
ENSG00000279344	AC007342.6	10	14	11	0	38	13	5
ENSG00000279722	AC007342.7	27	53	34	0	69	38	47
ENSG00000279741	AC007342.8	1	0	0	0	0	0	4
ENSG00000280027	AC007342.9	0	0	0	0	3	0	0
ENSG00000286845	AC007343.1	0	0	0	0	0	0	0
ENSG00000260850	AC007344.1	83	69	78	0	21	152	95
ENSG00000260258	AC007346.1	0	0	0	0	0	0	0
ENSG00000260939	AC007346.2	0	4	1	0	0	5	6
ENSG00000261049	AC007347.1	0	0	0	0	0	0	0
ENSG00000280454	AC007347.2	0	0	0	0	0	0	0
ENSG00000229424	AC007349.1	1	0	0	0	10	9	0
ENSG00000230831	AC007349.2	0	1	0	0	0	3	3
ENSG00000235728	AC007349.3	0	0	1	0	0	0	1
ENSG00000272984	AC007349.4	1	0	1	0	8	2	0
ENSG00000286300	AC007350.1	0	0	3	0	0	0	0
ENSG00000273570	AC007351.1	0	0	0	0	0	0	0
ENSG00000273942	AC007351.2	0	0	0	0	0	0	0
ENSG00000274230	AC007351.3	0	0	0	0	0	0	0
ENSG00000275231	AC007351.4	0	0	0	0	0	0	0
ENSG00000236951	AC007359.1	0	0	0	0	0	0	0
ENSG00000225216	AC007362.1	2	0	0	0	0	0	1
ENSG00000270677	AC007363.1	0	0	0	0	0	0	0
ENSG00000226756	AC007365.1	1	0	0	0	0	1	0
ENSG00000227791	AC007365.2	0	0	0	0	0	0	2
ENSG00000255595	AC007368.1	1	2	0	0	2	0	1
ENSG00000250098	AC007370.1	0	9	15	0	7	21	15
ENSG00000250371	AC007370.2	2	4	16	0	21	109	93
ENSG00000201384	AC007375.1	0	0	0	0	0	0	0
ENSG00000259164	AC007375.2	0	0	0	0	0	0	0
ENSG00000269883	AC007375.3	3	0	0	0	0	0	0
ENSG00000258566	AC007376.1	0	4	2	0	6	5	3
ENSG00000258569	AC007376.2	4	10	0	0	16	12	11
ENSG00000273090	AC007378.1	1	1	1	0	4	0	0
ENSG00000228590	AC007381.1	10	37	0	0	23	3	8
ENSG00000287640	AC007381.2	0	0	0	0	0	0	0
ENSG00000279519	AC007382.1	0	0	0	0	0	0	0
ENSG00000159186	AC007383.1	0	0	0	0	0	0	0
ENSG00000227946	AC007383.2	30	46	46	0	21	34	38
ENSG00000231955	AC007383.3	1	8	1	0	3	0	0
ENSG00000277502	AC007383.4	0	0	0	0	0	0	0
ENSG00000281780	AC007383.5	0	0	1	0	4	2	0
ENSG00000237513	AC007384.1	2	8	7	0	45	1	26
ENSG00000227394	AC007386.1	2	6	1	0	4	1	9
ENSG00000224646	AC007387.1	0	0	0	0	0	0	0
ENSG00000286739	AC007387.2	0	0	0	0	0	0	0
ENSG00000287687	AC007387.3	0	0	0	0	0	0	0
ENSG00000204929	AC007389.1	17	23	18	0	29	43	33
ENSG00000223739	AC007389.2	0	0	0	0	0	0	0
ENSG00000235725	AC007389.3	0	0	0	0	0	0	0
ENSG00000237979	AC007389.4	0	0	0	0	0	0	0
ENSG00000281920	AC007389.5	0	3	0	0	3	3	5
ENSG00000233159	AC007390.1	0	0	1	0	0	0	0
ENSG00000272054	AC007390.2	21	92	71	0	110	90	126
ENSG00000232028	AC007391.1	0	10	3	0	2	0	0
ENSG00000285925	AC007391.2	0	8	0	0	0	0	0
ENSG00000287316	AC007391.3	26	73	39	0	47	18	35
ENSG00000223604	AC007394.1	0	0	0	0	0	1	2
ENSG00000231386	AC007395.1	0	0	1	0	9	0	0
ENSG00000231918	AC007402.1	0	0	0	0	0	18	2
ENSG00000287867	AC007402.2	0	0	0	0	0	0	0
ENSG00000223859	AC007403.1	0	0	1	0	0	14	2
ENSG00000222509	AC007405.1	0	1	0	0	1	0	0
ENSG00000234350	AC007405.2	22	46	20	0	15	63	52
ENSG00000235934	AC007405.3	0	2	0	0	1	0	2
ENSG00000239467	AC007405.4	22	22	12	0	20	43	25
ENSG00000286611	AC007405.5	0	0	0	0	0	0	0
ENSG00000255671	AC007406.1	0	0	0	0	0	0	0
ENSG00000255746	AC007406.2	27	48	5	0	10	17	15
ENSG00000256540	AC007406.3	9	12	2	0	1	17	13
ENSG00000256577	AC007406.4	0	0	0	0	0	0	0
ENSG00000261799	AC007406.5	96	119	127	1	300	112	123
ENSG00000235495	AC007422.1	0	0	0	0	0	0	0
ENSG00000271239	AC007423.1	2	6	71	0	4	85	23
ENSG00000257501	AC007424.1	0	0	0	0	0	0	0
ENSG00000263499	AC007431.1	0	0	0	0	0	1	0
ENSG00000266100	AC007431.2	0	1	0	0	0	0	0
ENSG00000280028	AC007431.3	11	32	16	0	16	12	19
ENSG00000286387	AC007432.1	0	0	0	0	0	4	5
ENSG00000227187	AC007435.1	2	9	3	0	11	3	4
ENSG00000277948	AC007435.2	1	4	9	5	8	2	8
ENSG00000207410	AC007448.1	0	0	0	0	0	0	0
ENSG00000264093	AC007448.2	2	2	0	0	0	0	0
ENSG00000264421	AC007448.3	0	0	0	0	0	0	0
ENSG00000266473	AC007448.4	5	12	9	0	3	8	9
ENSG00000285877	AC007448.5	2	1	10	0	8	3	8
ENSG00000256237	AC007450.1	0	0	0	0	0	0	0
ENSG00000274551	AC007450.2	0	0	0	0	0	0	0
ENSG00000277705	AC007450.3	0	0	0	0	0	0	0
ENSG00000278654	AC007450.4	0	9	13	0	0	8	0
ENSG00000256708	AC007458.1	1	15	3	0	32	15	8
ENSG00000226506	AC007463.1	0	0	0	0	0	2	11
ENSG00000286857	AC007463.2	0	0	0	0	0	0	0
ENSG00000287641	AC007483.1	0	0	0	0	0	0	0
ENSG00000275710	AC007485.1	4	7	4	0	10	2	8
ENSG00000279059	AC007485.2	43	154	78	0	134	80	87
ENSG00000279427	AC007490.1	0	0	0	0	0	0	0
ENSG00000283258	AC007491.1	7	10	4	0	3	0	0
ENSG00000260573	AC007493.1	72	208	0	0	1	0	0
ENSG00000261393	AC007493.2	0	0	0	0	0	0	0
ENSG00000260012	AC007494.1	0	0	0	0	0	0	0
ENSG00000260744	AC007494.2	0	0	0	0	0	0	0
ENSG00000279509	AC007494.3	0	0	0	0	0	0	0
ENSG00000260041	AC007495.1	0	0	0	0	0	0	0
ENSG00000260194	AC007496.1	0	0	0	0	0	0	0
ENSG00000261630	AC007496.2	0	1	0	0	0	0	0
ENSG00000280392	AC007496.3	58	172	120	0	203	110	131
ENSG00000275191	AC007497.1	0	4	1	0	3	2	1
ENSG00000287909	AC007497.2	0	0	0	0	0	0	0
ENSG00000258272	AC007513.1	0	0	0	0	0	0	0
ENSG00000256306	AC007527.1	0	0	0	0	1	34	32
ENSG00000277935	AC007527.2	0	0	1	0	0	28	27
ENSG00000286303	AC007528.1	22	44	40	0	22	9	20
ENSG00000255871	AC007529.1	6	22	31	0	12	15	13
ENSG00000283240	AC007529.2	13	23	49	0	19	17	13
ENSG00000222767	AC007533.1	0	0	4	0	2	4	2
ENSG00000261369	AC007533.2	0	0	0	0	0	1	0
ENSG00000287928	AC007535.1	26	57	135	0	36	90	65
ENSG00000255356	AC007536.1	0	0	0	0	0	0	0
ENSG00000242405	AC007537.1	0	4	0	0	0	0	1
ENSG00000222160	AC007540.1	0	0	0	0	0	0	0
ENSG00000257579	AC007540.2	0	0	0	0	0	2	0
ENSG00000260329	AC007541.1	41	16	28	0	13	32	23
ENSG00000277595	AC007546.1	4	9	2	0	13	1	10
ENSG00000279360	AC007546.2	1	3	0	0	1	2	0
ENSG00000286220	AC007546.3	2	14	9	0	2	9	14
ENSG00000213155	AC007547.1	0	0	0	0	0	0	0
ENSG00000239805	AC007547.2	0	0	0	0	0	0	0
ENSG00000232736	AC007551.1	0	0	2	0	0	0	0
ENSG00000274328	AC007551.2	0	0	0	0	0	0	0
ENSG00000256450	AC007552.1	29	36	42	0	8	12	14
ENSG00000256564	AC007552.2	21	36	37	0	6	7	15
[truncated: 58,666 more rows]

## Sheet: Supp 2
Proteins	79F/30F Abundance Ratio: (FFPE 79) / (FFPE 30)	82F/30F Abundance Ratio: (FFPE 82) / (FFPE 30)	30F/82F	68/30 Abundance Ratio: (Tissue 68) / (Tissue 30)	79/30 Abundance Ratio: (Tissue 79) / (Tissue 30)	82/30 Abundance Ratio: (Tissue 82) / (Tissue 30)	30/ 82	Ab FFPE 30	Ab FFPE 79	Ab FFPE 82	Ab Tissue 30	Ab Tissue 79	Ab Tissue 82	Ab Tissue 68
Carbamoyl-phosphate synthase [ammonia], mitochondrial OS=Homo sapiens OX=9606 GN=CPS1 PE=1 SV=2	0.7	0.501	1.995	0.593	0.323	0.511	1.957	130.3	91.2	65.3	154.6	49.9	79	91.6
SWISS-PROT:P02768-1 Tax_Id=9606 Gene_Symbol=ALB Isoform 1 of Serum albumin precursor	1.344	0.595	1.681	1.437	1.755	1.725	0.58	105.4	141.6	62.7	64.1	112.5	110.6	92.1
Hemoglobin subunit beta OS=Homo sapiens OX=9606 GN=HBB PE=1 SV=2	0.671	0.325	3.075	1.061	3.65	1.457	0.686	140.2	94.1	45.6	62.8	229.3	91.6	66.7
Hemoglobin subunit delta OS=Homo sapiens OX=9606 GN=HBD PE=1 SV=2	0.84	0.942	1.062	1.101	3.465	1.327	0.754	91.3	76.7	86	69.9	242	92.7	76.9
Trypsin - Sus scrofa (Pig).	2.148	2.015	0.496	1.182	0.385	0.945	1.058	40.2	86.4	81	151.7	58.4	143.4	179.3
Actin, cytoplasmic 1 OS=Homo sapiens OX=9606 GN=ACTB PE=1 SV=1	1.296	1.399	0.714	1.503	0.985	1.224	0.816	95.5	123.9	133.7	71	69.9	87	106.8
Liver carboxylesterase 1 OS=Homo sapiens OX=9606 GN=CES1 PE=1 SV=2	0.977	0.43	2.325	0.849	0.464	0.682	1.467	191.6	187.3	82.4	81.4	37.8	55.5	69.1
Alcohol dehydrogenase 1B OS=Homo sapiens OX=9606 GN=ADH1B PE=1 SV=2	0.93	0.308	3.239	1.074	0.297	0.378	2.648	149.3	138.8	46.1	145.4	43.2	54.9	156.2
Hemoglobin subunit alpha OS=Homo sapiens OX=9606 GN=HBA1 PE=1 SV=2	0.567	0.965	1.037	1.176	4.81	1.972	0.507	141.3	80.1	136.3	32.7	157.4	64.5	38.5
Fatty acid-binding protein, liver OS=Homo sapiens OX=9606 GN=FABP1 PE=1 SV=1	1.162	0.254	3.933	0.93	0.514	0.644	1.553	146.3	169.9	37.2	122.7	63.1	79	114.1
Aldehyde dehydrogenase, mitochondrial OS=Homo sapiens OX=9606 GN=ALDH2 PE=1 SV=2	0.735	0.583	1.715	1.341	0.476	0.876	1.142	109.6	80.6	63.9	116.6	55.4	102.1	156.3
Retinal dehydrogenase 1 OS=Homo sapiens OX=9606 GN=ALDH1A1 PE=1 SV=2	0.88	0.239	4.186	0.721	0.441	0.669	1.495	166.2	146.3	39.7	112.3	49.6	75.1	81
Alcohol dehydrogenase 4 OS=Homo sapiens OX=9606 GN=ADH4 PE=1 SV=5	0.924	0.415	2.411	0.717	0.288	0.417	2.398	139.6	128.9	57.9	143.4	41.3	59.8	102.8
Protein disulfide-isomerase OS=Homo sapiens OX=9606 GN=P4HB PE=1 SV=3	1.417	0.668	1.497	1.015	0.713	1.083	0.924	78	110.5	52.1	118.5	84.5	128.3	120.2
Serine--pyruvate aminotransferase OS=Homo sapiens OX=9606 GN=AGXT PE=1 SV=1	0.315	0.378	2.642	0.853	0.495	2.061	0.485	203.2	63.9	76.9	85	42.1	175.3	72.5
SWISS-PROT:P05787 Tax_Id=9606 Gene_Symbol=KRT8 Keratin, type II cytoskeletal 8	0.96	0.436	2.295	1.243	0.803	1.155	0.866	108.1	103.8	47.1	91.8	73.7	106	114.2
Fructose-bisphosphate aldolase B OS=Homo sapiens OX=9606 GN=ALDOB PE=1 SV=2	1.034	0.405	2.468	0.825	0.41	0.892	1.12	193.5	200.1	78.4	78.3	32.2	69.9	64.7
Immunoglobulin heavy constant gamma 1 OS=Homo sapiens OX=9606 GN=IGHG1 PE=1 SV=1	2.202	0.597	1.674	1.605	1.83	3.283	0.305	90.9	200.1	54.3	47.6	87	156.1	76.4
Alcohol dehydrogenase 1A OS=Homo sapiens OX=9606 GN=ADH1A PE=1 SV=2	0.941	0.333	3.005	1.105	0.473	0.44	2.27	241.9	227.7	80.5	57.2	27.1	25.2	63.3
3-ketoacyl-CoA thiolase, mitochondrial OS=Homo sapiens OX=9606 GN=ACAA2 PE=1 SV=2	0.538	0.332	3.017	0.797	0.387	1.839	0.544	296.3	159.4	98.2	47.2	18.3	86.8	37.6
Alcohol dehydrogenase 1C OS=Homo sapiens OX=9606 GN=ADH1C PE=1 SV=2	0.92	0.353	2.838	0.871	0.454	0.46	2.174	120.6	110.9	42.5	126.3	57.3	58.1	110
Alpha-enolase OS=Homo sapiens OX=9606 GN=ENO1 PE=1 SV=2	1.079	1.602	0.624	1.259	0.698	1.163	0.86	76.7	82.8	122.9	84.7	59.1	98.5	106.6
Collagen alpha-3(VI) chain OS=Homo sapiens OX=9606 GN=COL6A3 PE=1 SV=5	1.723	1.104	0.905	1.014	0.744	0.695	1.439	31.5	54.2	34.8	155	115.4	107.7	157.2
Tubulin alpha-4A chain OS=Homo sapiens OX=9606 GN=TUBA4A PE=1 SV=1	1.007	2.275	0.439	1.166	0.802	1.522	0.657	75.1	75.6	170.9	71.3	57.1	108.5	83.1
ATP synthase subunit beta, mitochondrial OS=Homo sapiens OX=9606 GN=ATP5F1B PE=1 SV=3	1.013	4.681	0.214	0.975	0.753	1.088	0.92	55.1	55.8	257.9	70.5	53.1	76.6	68.7
Tubulin alpha-1A chain OS=Homo sapiens OX=9606 GN=TUBA1A PE=1 SV=1	1.105	3.449	0.29	0.943	1.068	0.75	1.334	59.5	65.7	205.1	81.8	87.3	61.3	77.1
Betaine--homocysteine S-methyltransferase 1 OS=Homo sapiens OX=9606 GN=BHMT PE=1 SV=2	0.932	0.334	2.992	0.904	0.486	0.75	1.333	148.4	138.4	49.6	118.9	57.8	89.2	107.5
Vimentin OS=Homo sapiens OX=9606 GN=VIM PE=1 SV=4	1.588	0.62	1.612	1.333	0.623	1.196	0.836	142.5	226.4	88.4	63.8	39.7	76.3	85
Endoplasmic reticulum chaperone BiP OS=Homo sapiens OX=9606 GN=HSPA5 PE=1 SV=2	1.138	0.632	1.581	1.046	0.755	1.099	0.909	173	197	109.4	64.2	48.5	70.6	67.2
Actin, gamma-enteric smooth muscle OS=Homo sapiens OX=9606 GN=ACTG2 PE=1 SV=1			0	1.897	1.785	1.282	0.78				73.2	130.8	93.9	138.9
UTP--glucose-1-phosphate uridylyltransferase OS=Homo sapiens OX=9606 GN=UGP2 PE=1 SV=5	1.26	0.588	1.701	0.946	0.535	0.832	1.203	109.2	137.6	64.2	113.4	60.7	94.3	107.3
Glyceraldehyde-3-phosphate dehydrogenase OS=Homo sapiens OX=9606 GN=GAPDH PE=1 SV=3	1.1	0.708	1.414	0.882	0.845	1.398	0.715	82.7	90.9	58.5	110.9	93.7	155	97.8
60 kDa heat shock protein, mitochondrial OS=Homo sapiens OX=9606 GN=HSPD1 PE=1 SV=2	0.823	1.565	0.639	0.95	0.4	1.022	0.979	150.6	124	235.7	54.9	21.9	56.1	52.2
Tubulin beta-4B chain OS=Homo sapiens OX=9606 GN=TUBB4B PE=1 SV=1	0.963	2.099	0.477	1.094	0.915	0.928	1.077	88.6	85.3	185.9	82.8	75.8	76.9	90.6
Formimidoyltransferase-cyclodeaminase OS=Homo sapiens OX=9606 GN=FTCD PE=1 SV=2			0	1.04	0.588	0.986	1.014				147.7	86.9	145.6	153.7
Tubulin beta chain OS=Homo sapiens OX=9606 GN=TUBB PE=1 SV=2	1.223	3.231	0.31	1.353	0.664	1.289	0.776	53.5	65.5	172.8	92.9	61.7	119.7	125.7
Enoyl-CoA hydratase, mitochondrial OS=Homo sapiens OX=9606 GN=ECHS1 PE=1 SV=4	0.767	0.88	1.136	0.893	0.523	0.687	1.456	168	128.8	147.9	87.2	45.6	59.9	77.9
Fructose-1,6-bisphosphatase 1 OS=Homo sapiens OX=9606 GN=FBP1 PE=1 SV=5			0	0.763	0.472	0.668	1.498				103.8	49	69.3	79.2
Malate dehydrogenase, mitochondrial OS=Homo sapiens OX=9606 GN=MDH2 PE=1 SV=3	1.051	1.555	0.643	0.957	0.593	1.085	0.922	116.3	122.3	180.9	79.2	47	85.9	75.8
Tubulin beta-2A chain OS=Homo sapiens OX=9606 GN=TUBB2A PE=1 SV=1	1.165	4.679	0.214				0	116.9	136.2	546.9
Serotransferrin OS=Homo sapiens OX=9606 GN=TF PE=1 SV=3	1.315	0.728	1.374	1.268	1.609	1.675	0.597	174.9	230	127.3	36.8	59.2	61.6	46.7
Isoform of P01009, Alpha-1-antitrypsin OS=Homo sapiens OX=9606 GN=SERPINA1 PE=1 SV=1	1.139	0.724	1.381	1.116	1.952	1.049	0.953	147.2	167.6	106.6	58.9	115.1	61.8	65.8
Acetyl-CoA acetyltransferase, mitochondrial OS=Homo sapiens OX=9606 GN=ACAT1 PE=1 SV=1			#VALUE!	1.823	0.744	1.69	0.592				111.4	82.9	188.2	203.1
Carbonic anhydrase 1 OS=Homo sapiens OX=9606 GN=CA1 PE=1 SV=2	0.714	0.579	1.726	1.11	2.712	1.523	0.656	245.9	175.7	142.5	27.5	74.6	41.9	30.5
Glutamate dehydrogenase 1, mitochondrial OS=Homo sapiens OX=9606 GN=GLUD1 PE=1 SV=2	0.928	0.94	1.064	0.985	0.513	0.732	1.366	174.3	161.7	163.8	77.2	39.7	56.5	76
Isoform of Q7Z4W1, L-xylulose reductase (Fragment) OS=Homo sapiens OX=9606 GN=DCXR PE=1 SV=8	0.642	0.377	2.653	0.762	0.398	0.499	2.003	205.6	132	77.5	79.9	31.8	39.9	60.9
Tubulin beta-4A chain OS=Homo sapiens OX=9606 GN=TUBB4A PE=1 SV=2			#VALUE!				0
Tubulin beta-3 chain OS=Homo sapiens OX=9606 GN=TUBB3 PE=1 SV=2	1.107	2.891	0.346				0	46.5	51.5	134.4
Gamma-enolase OS=Homo sapiens OX=9606 GN=ENO2 PE=1 SV=3	0.945	3.862	0.259				0	61.8	58.4	238.5
Apolipoprotein A-I OS=Homo sapiens OX=9606 GN=APOA1 PE=1 SV=1	1.661	0.733	1.365	1.449	1.302	1.228	0.814	37.4	62.2	27.4	96.1	125.1	118	139.2
Peroxisomal multifunctional enzyme type 2 OS=Homo sapiens OX=9606 GN=HSD17B4 PE=1 SV=3			#VALUE!	1.069	0.896	2.119	0.472				118.9	106.5	252	127.1
Isoform of P60174, Isoform 2 of Triosephosphate isomerase OS=Homo sapiens OX=9606 GN=TPI1	0.964	1.546	0.647	1.069	0.683	0.919	1.091	173.5	167.2	268.1	12	8.2	11	12.9
Isoform of P11142, Heat shock cognate 71 kDa protein OS=Homo sapiens OX=9606 GN=HSPA8 PE=1 SV=1	0.984	1.785	0.56	1.015	0.668	0.97	1.03	124.5	122.5	222.3	27.8	18.6	27	28.2
Complement C3 OS=Homo sapiens OX=9606 GN=C3 PE=1 SV=2	1.321	0.855	1.169	1.759	0.988	1.55	0.645	127	167.7	108.6	46.9	46.3	72.7	82.5
Endoplasmin OS=Homo sapiens OX=9606 GN=HSP90B1 PE=1 SV=1	1.242	0.556	1.8	1.182	0.782	1.147	0.872	92	114.3	51.1	105.6	82.5	121.1	124.8
ATP synthase subunit alpha, mitochondrial OS=Homo sapiens OX=9606 GN=ATP5F1A PE=1 SV=1	0.795	1.554	0.644	0.757	0.449	0.657	1.521	86.2	68.6	133.9	104.8	47.1	68.9	79.4
Epoxide hydrolase 1 OS=Homo sapiens OX=9606 GN=EPHX1 PE=1 SV=1	0.834	0.425	2.354	0.62	0.359	0.39	2.565	139.8	116.6	59.4	174.7	62.8	68.1	108.3
Isoform of P01860, Immunoglobulin heavy constant gamma 3 (Fragment) OS=Homo sapiens OX=9606 GN=IGHG3 PE=1 SV=1	1.283	0.541	1.848	1.075	1.731	2.059	0.488	193.3	248	104.6	14	24.2	28.7	15
Arginase-1 OS=Homo sapiens OX=9606 GN=ARG1 PE=1 SV=2	0.861	0.737	1.356	0.749	0.442	0.6	1.668	126.1	108.5	93	127.4	56.3	76.4	95.5
Peroxiredoxin-2 OS=Homo sapiens OX=9606 GN=PRDX2 PE=1 SV=5	0.845	0.641	1.56	1.063	1.619	1.193	0.838	184.7	156	118.4	47.5	76.9	56.7	50.5
Sorbitol dehydrogenase OS=Homo sapiens OX=9606 GN=SORD PE=1 SV=4	0.651	0.555	1.802	0.684	0.618	1.26	0.794	140.7	91.7	78.1	89.9	55.5	113.2	61.5
Profilin-1 OS=Homo sapiens OX=9606 GN=PFN1 PE=1 SV=2	1.003	0.891	1.123	1.015	0.649	0.819	1.222	8.2	8.2	7.3	191.3	124.1	156.6	194.1
3-ketoacyl-CoA thiolase, peroxisomal OS=Homo sapiens OX=9606 GN=ACAA1 PE=1 SV=2			#VALUE!	0.777	0.356	0.954	1.047				154.5	55	147.5	120.1
Catalase OS=Homo sapiens OX=9606 GN=CAT PE=1 SV=3	0.925	2.071	0.484	1.002	0.561	1.018	0.981	10.6	9.8	21.9	116.1	65.2	118.3	116.3
Isoform of P07339, Cathepsin D OS=Homo sapiens OX=9606 GN=CTSD PE=1 SV=1	0.958	0.418	2.393	1.149	0.862	0.845	1.184	107.7	103.1	45	104.2	89.9	88	119.7
Hydroxymethylglutaryl-CoA synthase, mitochondrial OS=Homo sapiens OX=9606 GN=HMGCS2 PE=1 SV=1	0.649	0.622	1.609	0.8	0.286	0.837	1.196	182.8	118.7	113.6	99	28.3	82.8	79.2
Talin-1 OS=Homo sapiens OX=9606 GN=TLN1 PE=1 SV=3			#VALUE!	1.435	2.989	1.72	0.582				112	334.7	192.6	160.7
Phosphatidylethanolamine-binding protein 1 OS=Homo sapiens OX=9606 GN=PEBP1 PE=1 SV=3	0.738	1.024	0.976	1.935	1.558	1.593	0.628	220	162.4	225.3	23.1	36	36.8	44.8
Myosin-9 OS=Homo sapiens OX=9606 GN=MYH9 PE=1 SV=4	1.033	0.535	1.868	1.024	0.695	0.965	1.036	58.1	60.1	31.1	124.6	86.6	120.3	127.6
Creatine kinase B-type OS=Homo sapiens OX=9606 GN=CKB PE=1 SV=1	1.223	9.453	0.106				#VALUE!	32.7	40	309.2
Long-chain-fatty-acid--CoA ligase 1 OS=Homo sapiens OX=9606 GN=ACSL1 PE=1 SV=1	0.876	0.63	1.588	0.914	0.6	0.672	1.487	194.7	170.5	122.6	69.9	42	47	63.9
Alpha-2-macroglobulin OS=Homo sapiens OX=9606 GN=A2M PE=1 SV=3	1.293	0.655	1.528	0.855	1.141	1.373	0.729	135.7	175.5	88.8	71.2	81.2	97.7	60.9
Keratin, type I cytoskeletal 18 OS=Homo sapiens OX=9606 GN=KRT18 PE=1 SV=2	0.902	0.502	1.99	1.215	0.412	1.043	0.959	211.7	190.9	106.4	60.5	24.9	63.1	73.5
Annexin A6 OS=Homo sapiens OX=9606 GN=ANXA6 PE=1 SV=3	1.281	0.902	1.109	1.138	0.93	1.179	0.848	136.3	174.6	122.9	44.1	41	52	50.2
Isoform of P01859, Immunoglobulin heavy constant gamma 2 (Fragment) OS=Homo sapiens OX=9606 GN=IGHG2 PE=1 SV=1			#VALUE!	1.243	1.08	1.167	0.857				110	118.8	128.4	136.8
Heat shock protein HSP 90-beta OS=Homo sapiens OX=9606 GN=HSP90AB1 PE=1 SV=4	1.083	1.186	0.844	1.338	1.005	1.035	0.966	122.4	132.5	145.1	31.6	31.8	32.7	42.3
Peptidyl-prolyl cis-trans isomerase A OS=Homo sapiens OX=9606 GN=PPIA PE=1 SV=2	1.014	2.146	0.466	1.041	0.46	0.767	1.303	89.6	90.8	192.2	116.6	53.7	89.5	121.3
Fatty acid synthase OS=Homo sapiens OX=9606 GN=FASN PE=1 SV=3	1.196	0.783	1.278	1.14	0.733	0.935	1.07	122.3	146.2	95.7	95.2	69.8	89	108.6
Heat shock protein HSP 90-alpha OS=Homo sapiens OX=9606 GN=HSP90AA1 PE=1 SV=5	0.93	1.055	0.948	1.119	0.651	1.095	0.913	160.5	149.2	169.3	32.4	21.1	35.5	36.2
Phosphoglycerate kinase 1 OS=Homo sapiens OX=9606 GN=PGK1 PE=1 SV=3	1.031	0.884	1.131	1.095	0.692	1.198	0.835	107.9	111.3	95.4	70.5	48.8	84.4	77.2
Peroxiredoxin-1 OS=Homo sapiens OX=9606 GN=PRDX1 PE=1 SV=1	0.86	0.651	1.534	0.914	0.306	0.758	1.318	93.6	80.5	61	126.3	38.7	95.8	115.5
Phosphoenolpyruvate carboxykinase [GTP], mitochondrial OS=Homo sapiens OX=9606 GN=PCK2 PE=1 SV=4	0.787	0.684	1.461	0.924	0.669	0.951	1.051	102.7	80.9	70.3	102.7	68.7	97.7	95
14-3-3 protein zeta/delta OS=Homo sapiens OX=9606 GN=YWHAZ PE=1 SV=1	0.865	3.829	0.261	1.474	1.042	0.723	1.383	32	27.6	122.4	94.3	98.3	68.2	139.1
Dimethylaniline monooxygenase [N-oxide-forming] 3 OS=Homo sapiens OX=9606 GN=FMO3 PE=1 SV=5	1.062	0.664	1.506	0.743	0.828	0.62	1.613	155.3	164.9	103.1	83.4	69.1	51.7	62
Beta-enolase OS=Homo sapiens OX=9606 GN=ENO3 PE=1 SV=5			#VALUE!	2.188	0.598	0.814	1.229				117.7	70.4	95.8	257.5
Protein disulfide-isomerase A3 OS=Homo sapiens OX=9606 GN=PDIA3 PE=1 SV=4	1.302	0.547	1.827	1.261	0.684	1.234	0.811	76	98.9	41.6	106.8	73	131.7	134.6
14-3-3 protein epsilon OS=Homo sapiens OX=9606 GN=YWHAE PE=1 SV=1	1.075	4.15	0.241	1.241	0.791	0.996	1.004	31.7	34.1	131.7	123.4	97.6	122.9	153.1
Cytosol aminopeptidase OS=Homo sapiens OX=9606 GN=LAP3 PE=1 SV=3	1.134	0.83	1.205	1.164	0.967	0.992	1.009	153.4	173.9	127.3	57.4	55.5	56.9	66.8
Trifunctional enzyme subunit alpha, mitochondrial OS=Homo sapiens OX=9606 GN=HADHA PE=1 SV=2	0.763	0.832	1.202	1.206	0.686	1.216	0.822	203.2	155	169	33.6	23.1	40.9	40.6
Immunoglobulin kappa constant OS=Homo sapiens OX=9606 GN=IGKC PE=1 SV=2			#VALUE!				#VALUE!
Argininosuccinate synthase OS=Homo sapiens OX=9606 GN=ASS1 PE=1 SV=2	0.834	0.492	2.032	0.693	0.297	0.637	1.57	100.8	84	49.6	155.4	46.2	99	107.7
Keratin, type II cytoskeletal 1 OS=Homo sapiens OX=9606 GN=KRT1 PE=1 SV=6	0.966	0.981	1.018	0.748	1.098	0.812	1.232	55.7	53.8	54.7	125.4	137.7	101.8	93.8
Methylmalonate-semialdehyde dehydrogenase [acylating], mitochondrial OS=Homo sapiens OX=9606 GN=ALDH6A1 PE=1 SV=2	0.751	0.639	1.564	1.182	0.609	0.994	1.006	200.4	150.4	128.1	66.4	40.4	66	78.5
Aldo-keto reductase family 1 member C2 OS=Homo sapiens OX=9606 GN=AKR1C2 PE=1 SV=3			#VALUE!				#VALUE!
Glutathione S-transferase A2 OS=Homo sapiens OX=9606 GN=GSTA2 PE=1 SV=4	0.261	0.19	5.269	0.208	0.106	0.139	7.174	180.2	47	34.2	243.2	25.7	33.9	50.5
Haptoglobin OS=Homo sapiens OX=9606 GN=HP PE=1 SV=1	1.204	0.39	2.565	0.692	0.775	0.813	1.23	151.6	182.5	59.1	85.6	66.4	69.6	59.2
Glutathione S-transferase A1 OS=Homo sapiens OX=9606 GN=GSTA1 PE=1 SV=3	0.519	0.163	6.138	0.506	0.165	0.252	3.966	164.5	85.4	26.8	165.4	27.3	41.7	83.8
Alcohol dehydrogenase 6 OS=Homo sapiens OX=9606 GN=ADH6 PE=1 SV=2	0.747	0.392	2.551	0.97	0.401	0.612	1.638	292.8	218.7	114.8	38.5	15.4	23.5	37.3
UDP-glucuronosyltransferase 1-1 OS=Homo sapiens OX=9606 GN=UGT1A1 PE=1 SV=1	1.119	0.55	1.819	0.855	0.514	0.63	1.586	124.6	139.4	68.5	102.3	52.5	64.5	87.5
Elongation factor 1-alpha 1 OS=Homo sapiens OX=9606 GN=EEF1A1 PE=1 SV=1	1.034	0.719	1.39	0.786	0.556	0.573	1.744	140.4	145.2	101	118.1	65.7	67.7	92.8
Carbonic anhydrase 2 OS=Homo sapiens OX=9606 GN=CA2 PE=1 SV=2	0.944	0.893	1.12	0.756	1.069	0.671	1.489	167.1	157.8	149.2	46.9	50.1	31.5	35.5
Pyruvate carboxylase, mitochondrial OS=Homo sapiens OX=9606 GN=PC PE=1 SV=2			#VALUE!	1.101	0.461	0.795	1.257				167.1	77	132.9	183.9
Hydroxyacid oxidase 1 OS=Homo sapiens OX=9606 GN=HAO1 PE=1 SV=1			#VALUE!	0.931	0.645	1.111	0.9				105.7	68.1	117.5	98.4
Isoform of P42330, Aldo-keto reductase family 1 member C3 OS=Homo sapiens OX=9606 GN=AKR1C3 PE=1 SV=1	0.58	0.263	3.8	0.626	0.286	0.527	1.897	180.1	104.4	47.4	134.3	38.4	70.8	84.1
C-1-tetrahydrofolate synthase, cytoplasmic OS=Homo sapiens OX=9606 GN=MTHFD1 PE=1 SV=3	1.045	0.784	1.276	0.762	0.699	0.797	1.255	141.4	147.8	110.8	95.6	66.8	76.2	72.9
Transitional endoplasmic reticulum ATPase OS=Homo sapiens OX=9606 GN=VCP PE=1 SV=4	1.116	1.231	0.813	0.999	0.548	0.899	1.113	158.9	177.3	195.5	35.5	19.4	31.9	35.4
UDP-glucuronosyltransferase 1-3 OS=Homo sapiens OX=9606 GN=UGT1A3 PE=1 SV=1			#VALUE!				#VALUE!
Electron transfer flavoprotein subunit alpha, mitochondrial OS=Homo sapiens OX=9606 GN=ETFA PE=1 SV=1	0.763	1.19	0.84	0.926	0.561	1.129	0.886	130.9	99.9	155.8	63	35.3	71.1	58.3
Retinol dehydrogenase 16 OS=Homo sapiens OX=9606 GN=RDH16 PE=1 SV=2	0.728	0.59	1.694	0.829	0.621	0.676	1.481	191.3	139.2	112.9	89.3	55.5	60.3	74
Cytosolic non-specific dipeptidase OS=Homo sapiens OX=9606 GN=CNDP2 PE=1 SV=2	1.062	0.63	1.586	0.893	0.644	0.847	1.179	223.5	237.3	140.9	33	21.3	28	29.5
Isocitrate dehydrogenase [NADP] cytoplasmic OS=Homo sapiens OX=9606 GN=IDH1 PE=1 SV=2	0.938	0.65	1.537	0.973	0.549	0.789	1.268	54.1	50.7	35.2	143.4	78.8	113.1	139.5
Alpha-actinin-4 OS=Homo sapiens OX=9606 GN=ACTN4 PE=1 SV=2	1.165	0.734	1.363	1.322	0.517	0.973	1.028	29.3	34.1	21.5	155.5	80.4	151.2	205.6
Aldo-keto reductase family 1 member C4 OS=Homo sapiens OX=9606 GN=AKR1C4 PE=1 SV=3			#VALUE!	0.888	0.728	0.841	1.193				16.1	11.7	13.5	14.3
UDP-glucuronosyltransferase 2B7 OS=Homo sapiens OX=9606 GN=UGT2B7 PE=1 SV=1	0.967	0.423	2.361	1.118	1.707	3.056	0.327	207.5	200.7	87.9	25.1	42.9	76.7	28.1
2-iminobutanoate/2-iminopropanoate deaminase OS=Homo sapiens OX=9606 GN=RIDA PE=1 SV=1	0.844	0.426	2.345	1.091	0.935	1.018	0.982	254.7	215.1	108.6	22.1	20.6	22.5	24.1
Cytosolic 10-formyltetrahydrofolate dehydrogenase OS=Homo sapiens OX=9606 GN=ALDH1L1 PE=1 SV=2	1.025	1.018	0.982	0.838	0.63	0.72	1.389	108	110.8	110	85.7	53.9	61.7	71.8
Histone H4 OS=Homo sapiens OX=9606 GN=HIST1H4A PE=1 SV=2	0.802	1.351	0.74	0.945	0.452	0.544	1.839	63.9	51.2	86.3	156.5	70.7	85.1	148
Calreticulin OS=Homo sapiens OX=9606 GN=CALR PE=1 SV=1	1.398	0.873	1.144	1.096	0.638	1.03	0.971	42	58.7	36.7	137.2	87.5	141.3	150.3
Cytochrome P450 3A4 OS=Homo sapiens OX=9606 GN=CYP3A4 PE=1 SV=4	0.626	0.412	2.429	0.992	0.47	0.735	1.36	181.2	113.3	74.6	101.9	47.8	74.9	101
Carbonyl reductase [NADPH] 1 OS=Homo sapiens OX=9606 GN=CBR1 PE=1 SV=3	0.92	0.718	1.394	0.73	0.669	0.744	1.344	112.6	103.5	80.8	104.7	70	77.9	76.4
UDP-glucuronosyltransferase 1-9 OS=Homo sapiens OX=9606 GN=UGT1A9 PE=1 SV=1			#VALUE!				#VALUE!
Annexin A5 OS=Homo sapiens OX=9606 GN=ANXA5 PE=1 SV=2	1.154	0.852	1.173	1.3	0.954	0.843	1.188	196.8	227.1	167.8	29.1	27.8	24.5	37.8
4-aminobutyrate aminotransferase, mitochondrial OS=Homo sapiens OX=9606 GN=ABAT PE=1 SV=3			#VALUE!	1.191	0.371	0.856	1.168				85	31.6	72.8	101.3
Isoform of P14618, Pyruvate kinase OS=Homo sapiens OX=9606 GN=PKM PE=1 SV=1	1.025	1.668	0.6	1.003	0.435	0.63	1.581	177	181.4	295.2	13.6	5.9	8.6	13.6
Cytochrome b5 OS=Homo sapiens OX=9606 GN=CYB5A PE=1 SV=2	0.822	0.536	1.865	0.783	0.574	0.802	1.246	213.7	175.6	114.6	66.9	38.4	53.7	52.3
Aspartate aminotransferase, mitochondrial OS=Homo sapiens OX=9606 GN=GOT2 PE=1 SV=3			#VALUE!	0.906	0.571	0.692	1.444				210.4	120	145.7	190.7
Aspartate aminotransferase, cytoplasmic OS=Homo sapiens OX=9606 GN=GOT1 PE=1 SV=3	0.956	0.419	2.388	0.93	0.953	0.808	1.238	209.9	200.6	87.9	53.1	50.6	42.9	49.4
3-hydroxyacyl-CoA dehydrogenase type-2 OS=Homo sapiens OX=9606 GN=HSD17B10 PE=1 SV=3			#VALUE!	1.034	0.525	1.174	0.851				144.2	75.7	169.4	149.2
Phosphoglucomutase-1 OS=Homo sapiens OX=9606 GN=PGM1 PE=1 SV=3	0.936	0.634	1.576	0.827	0.418	0.539	1.858	59.9	56	38	167	69.7	89.9	138.1
Triokinase/FMN cyclase OS=Homo sapiens OX=9606 GN=TKFC PE=1 SV=2	0.983	0.708	1.411	0.775	0.964	0.585	1.711	121.1	119.1	85.8	88.3	85	51.6	68.4
SWISS-PROT:P13645 Tax_Id=9606 Gene_Symbol=KRT10 Keratin, type I cytoskeletal 10	0.868	0.804	1.244	0.99	1.534	1.169	0.854	153.9	133.5	123.7	30.3	46.5	35.5	30
Ornithine carbamoyltransferase, mitochondrial OS=Homo sapiens OX=9606 GN=OTC PE=1 SV=3			#VALUE!	0.62	0.478	0.807	1.239				202	96.5	163.1	125.2
Isoform of P0DP23, Calmodulin-2 (Fragment) OS=Homo sapiens OX=9606 GN=CALM2 PE=1 SV=1	1.096	6.133	0.163	1.317	1.177	1.513	0.66	45.6	49.9	279.4	52.8	62.2	80	69.6
Delta-1-pyrroline-5-carboxylate dehydrogenase, mitochondrial OS=Homo sapiens OX=9606 GN=ALDH4A1 PE=1 SV=3			#VALUE!	0.934	0.5	0.773	1.293				200.2	100	154.8	187.1
Isoform of P61604, 10 kDa heat shock protein, mitochondrial OS=Homo sapiens OX=9606 GN=HSPE1 PE=1 SV=1	0.953	3.373	0.296	0.956	0.629	1.081	0.925	73.9	70.4	249.3	58	36.5	62.7	55.5
Aldehyde oxidase OS=Homo sapiens OX=9606 GN=AOX1 PE=1 SV=2			#VALUE!	1.34	0.658	1.028	0.972				139.3	91.7	143.3	186.7
Isoform of P06737, Alpha-1,4 glucan phosphorylase OS=Homo sapiens OX=9606 GN=PYGL PE=1 SV=1	1.055	0.769	1.3	1.132	0.565	0.802	1.248	69.7	73.5	53.6	133.4	75.3	106.9	151.1
Electron transfer flavoprotein subunit beta OS=Homo sapiens OX=9606 GN=ETFB PE=1 SV=3			#VALUE!	0.89	0.465	0.99	1.01				174.2	81.1	172.5	155.1
Very long-chain specific acyl-CoA dehydrogenase, mitochondrial OS=Homo sapiens OX=9606 GN=ACADVL PE=1 SV=1			#VALUE!	1.074	0.62	1.272	0.787				161.8	100.4	205.7	173.8
Isoform of Q68CK6, Acyl-coenzyme A synthetase ACSM2B, mitochondrial OS=Homo sapiens OX=9606 GN=ACSM2B PE=1 SV=1			#VALUE!	0.868	0.354	1.062	0.942				243.7	86.1	258.7	211.5
Protein disulfide-isomerase A6 OS=Homo sapiens OX=9606 GN=PDIA6 PE=1 SV=1	1.35	0.689	1.452	1.075	0.68	0.944	1.059	46.9	63.3	32.3	46.9	31.9	44.3	50.5
Alcohol dehydrogenase [NADP(+)] OS=Homo sapiens OX=9606 GN=AKR1A1 PE=1 SV=3	1.008	0.874	1.143	0.945	0.975	0.69	1.449	76.8	77.4	67.2	124.5	121.4	85.9	117.6
Acetyl-CoA acetyltransferase, cytosolic OS=Homo sapiens OX=9606 GN=ACAT2 PE=1 SV=2			#VALUE!				#VALUE!
Elongation factor 2 OS=Homo sapiens OX=9606 GN=EEF2 PE=1 SV=4	1.004	0.868	1.151	0.867	0.6	0.808	1.238	96.7	97	84	111.3	66.8	89.9	96.4
Cytochrome P450 2C9 OS=Homo sapiens OX=9606 GN=CYP2C9 PE=1 SV=3	0.934	0.889	1.125	0.87	0.37	0.619	1.616	159.3	148.8	141.6	88.9	32.9	55	77.4
Fumarylacetoacetase OS=Homo sapiens OX=9606 GN=FAH PE=1 SV=2	0.937	0.671	1.492	0.969	0.488	0.741	1.351	172.6	161.7	115.7	89	43.4	65.9	86.3
Isoform of Q13813, Spectrin alpha chain, non-erythrocytic 1 OS=Homo sapiens OX=9606 GN=SPTAN1 PE=1 SV=1	1.239	2.072	0.483	1.053	0.52	0.912	1.098	119.1	147.6	246.8	43.9	22.8	40	46.2
Isoform of P30046, D-dopachrome decarboxylase OS=Homo sapiens OX=9606 GN=DDT PE=1 SV=1	0.915	0.355	2.818	1.422	0.715	0.638	1.567	248	227	88	48.9	35	31.2	69.6
Non-specific lipid-transfer protein OS=Homo sapiens OX=9606 GN=SCP2 PE=1 SV=2			#VALUE!	1.24	0.706	1.581	0.633				124.4	87.8	196.6	154.2
Isoform of P49419, Alpha-aminoadipic semialdehyde dehydrogenase OS=Homo sapiens OX=9606 GN=ALDH7A1 PE=1 SV=1			#VALUE!	1.067	0.537	0.887	1.127				65.5	35.1	58.1	69.9
Isoform of P13637, Sodium/potassium-transporting ATPase subunit alpha-3 OS=Homo sapiens OX=9606 GN=ATP1A3 PE=1 SV=1	1.094	3.792	0.264				#VALUE!	99.2	108.5	376.2
Alanine aminotransferase 1 OS=Homo sapiens OX=9606 GN=GPT PE=1 SV=3			#VALUE!	0.806	0.559	0.681	1.47				208.4	116.4	141.8	167.9
Stress-70 protein, mitochondrial OS=Homo sapiens OX=9606 GN=HSPA9 PE=1 SV=2	0.508	0.3	3.334	0.92	0.484	0.947	1.055	361.4	183.7	108.4	30.9	15	29.3	28.5
Dihydropyrimidinase-related protein 2 OS=Homo sapiens OX=9606 GN=DPYSL2 PE=1 SV=1	1.3	3.737	0.268				#VALUE!	132.5	172.3	495.2
Cytoplasmic aconitate hydratase OS=Homo sapiens OX=9606 GN=ACO1 PE=1 SV=3	0.995	0.671	1.49	1.079	0.732	1.179	0.848	150	149.3	100.7	63.8	46.7	75.2	68.8
Dolichyl-diphosphooligosaccharide--protein glycosyltransferase subunit 1 OS=Homo sapiens OX=9606 GN=RPN1 PE=1 SV=1	1.044	0.687	1.456	1.072	0.605	1.033	0.968	146.5	153	100.6	107.8	65.2	111.4	115.6
Calcium-binding mitochondrial carrier protein Aralar2 OS=Homo sapiens OX=9606 GN=SLC25A13 PE=1 SV=2			#VALUE!	1.009	0.609	0.954	1.048				172.3	104.8	164.4	173.7
Fructose-bisphosphate aldolase A OS=Homo sapiens OX=9606 GN=ALDOA PE=1 SV=2	1.233	4.381	0.228	1.196	1.076	1.171	0.853	24.9	30.7	109.2	117	125.9	137.1	139.9
Neutral alpha-glucosidase AB OS=Homo sapiens OX=9606 GN=GANAB PE=1 SV=3	1.114	1.148	0.872	1.171	0.823	0.974	1.027	135.1	150.4	155	71.8	59	69.9	84.1
Band 3 anion transport protein OS=Homo sapiens OX=9606 GN=SLC4A1 PE=1 SV=3			#VALUE!	1.155	2.325	1.22	0.817				7.6	17.7	9.3	8.8
60S acidic ribosomal protein P2 OS=Homo sapiens OX=9606 GN=RPLP2 PE=1 SV=1	1.326	0.552	1.812	1.199	1.041	1.06	0.943	139	184.3	76.7	54.2	56.5	57.5	65
Serine hydroxymethyltransferase, cytosolic OS=Homo sapiens OX=9606 GN=SHMT1 PE=1 SV=1	1.254	1.431	0.7	1.499	0.589	0.86	1.163	19.1	23.9	27.3	154.1	90.8	132.5	231
Peroxisomal bifunctional enzyme OS=Homo sapiens OX=9606 GN=EHHADH PE=1 SV=3			#VALUE!	0.829	0.493	0.99	1.01				168	82.9	166.3	139.3
Immunoglobulin heavy constant alpha 1 OS=Homo sapiens OX=9606 GN=IGHA1 PE=1 SV=2	1.775	0.976	1.024	1.159	1.758	1.82	0.549	95.5	169.6	93.3	48.9	85.9	89	56.7
Protein disulfide-isomerase A4 OS=Homo sapiens OX=9606 GN=PDIA4 PE=1 SV=2	1.138	0.454	2.202	1.033	0.653	1.022	0.977	174.6	198.7	79.3	46	30.1	47.1	47.5
Glyoxylate reductase/hydroxypyruvate reductase OS=Homo sapiens OX=9606 GN=GRHPR PE=1 SV=1	0.899	0.439	2.28	0.86	0.299	0.529	1.892	186.5	167.5	81.8	68.5	20.5	36.2	58.9
UDP-glucose 6-dehydrogenase OS=Homo sapiens OX=9606 GN=UGDH PE=1 SV=1	0.73	0.818	1.22	0.751	0.372	0.669	1.494	53.2	38.8	43.6	147.8	55	98.9	111
2,4-dienoyl-CoA reductase, mitochondrial OS=Homo sapiens OX=9606 GN=DECR1 PE=1 SV=1			#VALUE!	1.02	0.691	0.946	1.056				148.4	102.6	140.5	151.4
Isoform of P12814, Alpha-actinin-1 OS=Homo sapiens OX=9606 GN=ACTN1 PE=1 SV=1			#VALUE!	1.732	1.012	1.208	0.826				25.2	25.5	30.5	43.7
Rab GDP dissociation inhibitor beta OS=Homo sapiens OX=9606 GN=GDI2 PE=1 SV=2	1.134	1.201	0.832	1.041	0.805	1.002	0.997	93.7	106.3	112.6	33.3	26.8	33.4	34.7
Peroxiredoxin-6 OS=Homo sapiens OX=9606 GN=PRDX6 PE=1 SV=3	1.01	0.889	1.125	0.9	0.534	0.473	2.117	182.5	184.4	162.2	56.3	30.1	26.6	50.7
Isocitrate dehydrogenase [NADP], mitochondrial OS=Homo sapiens OX=9606 GN=IDH2 PE=1 SV=2	0.746	0.411	2.434	1.128	0.47	0.677	1.474	206.9	154.5	85	39.2	18.4	26.6	44.2
L-lactate dehydrogenase A chain OS=Homo sapiens OX=9606 GN=LDHA PE=1 SV=2	1.169	0.935	1.068	1.02	0.483	0.769	1.3	73.5	86	68.8	141.2	68.2	108.6	144
Isoform of Q08AH3, Acyl-coenzyme A synthetase ACSM2A, mitochondrial OS=Homo sapiens OX=9606 GN=ACSM2A PE=1 SV=1			#VALUE!				#VALUE!
Prostaglandin reductase 1 OS=Homo sapiens OX=9606 GN=PTGR1 PE=1 SV=2	0.86	0.381	2.623				#VALUE!	167.9	144.4	64
Delta(3,5)-Delta(2,4)-dienoyl-CoA isomerase, mitochondrial OS=Homo sapiens OX=9606 GN=ECH1 PE=1 SV=2			#VALUE!	1.082	0.577	0.783	1.277				135.2	77.9	105.9	146.3
Fructose-bisphosphate aldolase C OS=Homo sapiens OX=9606 GN=ALDOC PE=1 SV=2	0.883	3.074	0.325				#VALUE!	77.4	68.3	237.8
Annexin A4 OS=Homo sapiens OX=9606 GN=ANXA4 PE=1 SV=4			#VALUE!	0.952	0.753	0.995	1.006				154.5	116.3	153.6	147
Heterogeneous nuclear ribonucleoprotein K OS=Homo sapiens OX=9606 GN=HNRNPK PE=1 SV=1	1.077	1.225	0.817	1.26	0.556	1.049	0.953	121.2	130.5	148.4	76.9	42.8	80.7	97
SWISS-PROT:P02070 (Bos taurus) Hemoglobin subunit beta			#VALUE!	1.608	1.772	1.276	0.783				141.4	250.6	180.5	227.4
Annexin A2 OS=Homo sapiens OX=9606 GN=ANXA2 PE=1 SV=2	1.114	0.817	1.224	1.21	1.036	1.061	0.942	105.5	117.5	86.2	92.9	96.2	98.6	112.3
Argininosuccinate lyase OS=Homo sapiens OX=9606 GN=ASL PE=1 SV=4	1.172	1.012	0.989	0.97	0.751	0.699	1.431	35.9	42	36.3	168.4	126.5	117.7	163.3
Thymidine phosphorylase OS=Homo sapiens OX=9606 GN=TYMP PE=1 SV=2	1.251	0.891	1.122				#VALUE!	128.2	160.3	114.3
Isoform of P25325, 3-mercaptopyruvate sulfurtransferase OS=Homo sapiens OX=9606 GN=MPST PE=1 SV=1			#VALUE!	0.92	0.707	0.881	1.134				94.6	66.9	83.4	87.1
Cytochrome P450 2A6 OS=Homo sapiens OX=9606 GN=CYP2A6 PE=1 SV=3	0.79	0.732	1.366	0.638	0.479	0.918	1.09	211.6	167.2	154.9	38.9	18.6	35.7	24.8
17-beta-hydroxysteroid dehydrogenase type 6 OS=Homo sapiens OX=9606 GN=HSD17B6 PE=1 SV=1			#VALUE!	0.941	0.569	0.789	1.267				139.9	79.7	110.4	131.6
Isoform of P32754, 4-hydroxyphenylpyruvate dioxygenase OS=Homo sapiens OX=9606 GN=HPD PE=1 SV=1	0.883	0.461	2.167	1.103	0.515	0.64	1.562	46.8	41.3	21.6	185.9	95.7	119	205
Sarcosine dehydrogenase, mitochondrial OS=Homo sapiens OX=9606 GN=SARDH PE=1 SV=1			#VALUE!	1.245	0.887	1.418	0.705				90.1	79.9	127.8	112.2
Superoxide dismutase [Cu-Zn] OS=Homo sapiens OX=9606 GN=SOD1 PE=1 SV=2			#VALUE!	0.856	0.34	0.588	1.702				194.7	66.1	114.4	166.7
NADPH--cytochrome P450 reductase OS=Homo sapiens OX=9606 GN=POR PE=1 SV=2	0.842	0.651	1.535	0.926	0.572	0.862	1.16	117.4	98.9	76.5	99.9	57.1	86.1	92.5
Lumican OS=Homo sapiens OX=9606 GN=LUM PE=1 SV=2			#VALUE!	1.095	2.942	2.097	0.477				85.9	252.7	180.1	94
S-adenosylmethionine synthase isoform type-1 OS=Homo sapiens OX=9606 GN=MAT1A PE=1 SV=2	0.872	0.744	1.344	0.915	0.632	0.686	1.457	152.8	133.2	113.7	44.3	28	30.4	40.6
Isoform of P0DMV9, Heat shock 70 kDa protein 1B OS=Homo sapiens OX=9606 GN=HSPA1B PE=1 SV=1	0.702	0.565	1.775	1.124	0.694	1.004	0.996	26.8	18.8	15.1	103.6	72	104	116.5
Glycine amidinotransferase, mitochondrial OS=Homo sapiens OX=9606 GN=GATM PE=1 SV=1	0.771	0.903	1.105	1.436	0.355	0.494	2.025	32.7	25.2	29.6	178.4	63.3	88.1	256.2
Fatty aldehyde dehydrogenase OS=Homo sapiens OX=9606 GN=ALDH3A2 PE=1 SV=1			#VALUE!	1.014	0.465	0.716	1.397				212.5	98.8	152.1	215.4
Sodium/potassium-transporting ATPase subunit alpha-1 OS=Homo sapiens OX=9606 GN=ATP1A1 PE=1 SV=1			#VALUE!				#VALUE!
Probable imidazolonepropionase OS=Homo sapiens OX=9606 GN=AMDHD1 PE=1 SV=2			#VALUE!	1.08	0.854	1.13	0.884				101	86.3	114.2	109.1
Histone H2A type 2-C OS=Homo sapiens OX=9606 GN=HIST2H2AC PE=1 SV=4			#VALUE!				#VALUE!
Superoxide dismutase [Mn], mitochondrial OS=Homo sapiens OX=9606 GN=SOD2 PE=1 SV=3	1.107	1.659	0.603	1.639	0.539	2.958	0.338	138.8	153.7	230.2	30.2	16.3	89.3	49.5
Isoform of P04083, Annexin (Fragment) OS=Homo sapiens OX=9606 GN=ANXA1 PE=1 SV=1	1.094	0.986	1.015	1.483	0.94	1.161	0.862	129.9	142.1	128	87.3	82	101.3	129.4
Methanethiol oxidase OS=Homo sapiens OX=9606 GN=SELENBP1 PE=1 SV=2	1.045	0.795	1.258	1.208	0.693	0.805	1.243	116.7	121.9	92.8	81.4	56.4	65.5	98.3
Tubulin beta-6 chain OS=Homo sapiens OX=9606 GN=TUBB6 PE=1 SV=1			#VALUE!				#VALUE!
Ferritin light chain OS=Homo sapiens OX=9606 GN=FTL PE=1 SV=2	1.007	0.472	2.12	2.127	0.877	3.739	0.268	163.7	164.8	77.2	38	33.3	141.9	80.7
Isoform of P23528, Cofilin-1 OS=Homo sapiens OX=9606 GN=CFL1 PE=1 SV=1	1.304	1.988	0.503	1.247	1.235	1.143	0.875	42.3	55.1	84.1	106.3	131.2	121.5	132.5
UDP-glucuronosyltransferase 2B4 OS=Homo sapiens OX=9606 GN=UGT2B4 PE=1 SV=2	0.707	0.463	2.161	0.706	0.479	0.644	1.554	106.1	75	49.1	141.4	67.7	91	99.9
Flavin reductase (NADPH) OS=Homo sapiens OX=9606 GN=BLVRB PE=1 SV=3			#VALUE!	0.959	1.429	0.823	1.216				99.2	141.8	81.6	95.2
Aminoacylase-1 OS=Homo sapiens OX=9606 GN=ACY1 PE=1 SV=1	1.108	0.737	1.357	1.016	1.136	1.259	0.794	63.5	70.3	46.8	85.7	97.4	107.9	87.1
Peptidyl-prolyl cis-trans isomerase B OS=Homo sapiens OX=9606 GN=PPIB PE=1 SV=2	1.308	0.317	3.153	0.744	0.465	0.587	1.704	109.4	143.1	34.7	158.5	73.6	93	118
Malate dehydrogenase, cytoplasmic OS=Homo sapiens OX=9606 GN=MDH1 PE=1 SV=4	1.169	2.77	0.361	0.937	0.559	1.233	0.811	81	94.7	224.3	107.3	59.9	132.3	100.5
Isoform of P07108, Acyl-CoA-binding protein OS=Homo sapiens OX=9606 GN=DBI PE=1 SV=1			#VALUE!				#VALUE!
Hydroxymethylglutaryl-CoA lyase, mitochondrial OS=Homo sapiens OX=9606 GN=HMGCL PE=1 SV=2			#VALUE!	1.059	0.684	1.048	0.955				40.2	27.5	42.1	42.5
Histone H2B type 2-F OS=Homo sapiens OX=9606 GN=HIST2H2BF PE=1 SV=3	0.794	1.625	0.616	1.041	0.41	0.766	1.306	116	92.1	188.4	85.4	35	65.4	89
Trifunctional enzyme subunit beta, mitochondrial OS=Homo sapiens OX=9606 GN=HADHB PE=1 SV=3			#VALUE!	0.986	0.456	0.939	1.064				192.3	87.8	180.7	189.5
Aldehyde dehydrogenase X, mitochondrial OS=Homo sapiens OX=9606 GN=ALDH1B1 PE=1 SV=3			#VALUE!	0.736	0.335	0.591	1.692				300.5	100.7	177.6	221.2
Aflatoxin B1 aldehyde reductase member 3 OS=Homo sapiens OX=9606 GN=AKR7A3 PE=1 SV=2	1.041	0.788	1.269	0.951	0.744	0.792	1.263	74.1	77.1	58.4	76.3	56.8	60.4	72.6
Isoform of Q9HDC9, Adipocyte plasma membrane-associated protein (Fragment) OS=Homo sapiens OX=9606 GN=APMAP PE=1 SV=1			#VALUE!				#VALUE!
Isoform of P60660, Myosin light polypeptide 6 OS=Homo sapiens OX=9606 GN=MYL6 PE=1 SV=1	1.098	1.767	0.566	1.361	0.694	1.186	0.844	103.5	113.6	182.9	78.4	54.4	92.9	106.7
Hemoglobin subunit gamma-1 OS=Homo sapiens OX=9606 GN=HBG1 PE=1 SV=2			#VALUE!				#VALUE!
Adenylate kinase 2, mitochondrial OS=Homo sapiens OX=9606 GN=AK2 PE=1 SV=2			#VALUE!	1.274	0.989	1.236	0.809				101.8	100.7	125.9	129.8
Thioredoxin-dependent peroxide reductase, mitochondrial OS=Homo sapiens OX=9606 GN=PRDX3 PE=1 SV=3			#VALUE!	1.126	0.787	0.898	1.114				146	114.9	131.1	164.4
Isoform of Q00610, Clathrin heavy chain OS=Homo sapiens OX=9606 GN=CLTC PE=1 SV=1	0.861	1.476	0.678				#VALUE!	239.7	206.4	353.8
Prelamin-A/C OS=Homo sapiens OX=9606 GN=LMNA PE=1 SV=1			#VALUE!	1.03	0.815	1.101	0.908				86.3	70.3	95	88.9
Bile salt sulfotransferase OS=Homo sapiens OX=9606 GN=SULT2A1 PE=1 SV=3			#VALUE!				#VALUE!
Dihydropyrimidinase OS=Homo sapiens OX=9606 GN=DPYS PE=1 SV=1	0.843	1.062	0.942		100	100	#VALUE!	14.5	12.2	15.4		133.5	266.5
Short/branched chain specific acyl-CoA dehydrogenase, mitochondrial OS=Homo sapiens OX=9606 GN=ACADSB PE=1 SV=1			#VALUE!	1.201	1.058	1.057	0.946				135.5	143.5	143.3	162.8
Bile acyl-CoA synthetase OS=Homo sapiens OX=9606 GN=SLC27A5 PE=1 SV=1			#VALUE!	0.802	0.79	1.046	0.957				190.2	150.2	198.8	152.5
Glutathione S-transferase omega-1 OS=Homo sapiens OX=9606 GN=GSTO1 PE=1 SV=2			#VALUE!	0.888	0.614	0.955	1.047				146.4	89.9	139.8	130
ADP-ribosylation factor 3 OS=Homo sapiens OX=9606 GN=ARF3 PE=1 SV=2	1.384	2.237	0.447				#VALUE!	173.1	239.6	387.2
Isoform of Q99497, Protein/nucleic acid deglycase DJ-1 OS=Homo sapiens OX=9606 GN=PARK7 PE=1 SV=1	1.094	1.719	0.582	0.986	1.08	0.77	1.301	126.3	138.1	217	50.2	54.2	38.6	49.5
Nucleoside diphosphate kinase A OS=Homo sapiens OX=9606 GN=NME1 PE=1 SV=1	0.983	2.635	0.379	1.009	0.664	0.823	1.217	99.2	97.5	261.4	43.8	29.1	36	44.2
Serum paraoxonase/arylesterase 1 OS=Homo sapiens OX=9606 GN=PON1 PE=1 SV=3			#VALUE!	1.034	0.951	1.006	0.994				104.2	99.1	104.8	107.7
Guanine nucleotide-binding protein G(i) subunit alpha-2 OS=Homo sapiens OX=9606 GN=GNAI2 PE=1 SV=3			#VALUE!				#VALUE!
Filamin-A OS=Homo sapiens OX=9606 GN=FLNA PE=1 SV=4	1.242	0.993	1.007	1.339	1.254	1.302	0.768	123.6	153.6	122.8	81.7	102.5	106.4	109.4
Thiosulfate sulfurtransferase OS=Homo sapiens OX=9606 GN=TST PE=1 SV=4			#VALUE!	0.819	0.914	0.871	1.147				149.5	136.7	130.3	122.5
Glutathione S-transferase Mu 4 OS=Homo sapiens OX=9606 GN=GSTM4 PE=1 SV=3			#VALUE!	0.881	0.44	0.324	3.09				302.5	133	97.9	266.6
Immunoglobulin lambda constant 2 OS=Homo sapiens OX=9606 GN=IGLC2 PE=1 SV=1			#VALUE!				#VALUE!
Serine hydroxymethyltransferase, mitochondrial OS=Homo sapiens OX=9606 GN=SHMT2 PE=1 SV=3	0.947	1.151	0.869	0.967	0.603	0.767	1.303	91.2	86.3	104.9	130.2	78.5	99.9	125.9
Proteasome subunit alpha type-5 OS=Homo sapiens OX=9606 GN=PSMA5 PE=1 SV=3			#VALUE!				#VALUE!
ADP/ATP translocase 2 OS=Homo sapiens OX=9606 GN=SLC25A5 PE=1 SV=7	0.943	2.342	0.427	0.933	0.487	1.321	0.757	76.3	72	178.8	86.1	41.9	113.7	80.3
14-3-3 protein gamma OS=Homo sapiens OX=9606 GN=YWHAG PE=1 SV=2	1.399	1.698	0.589				#VALUE!	113.3	158.5	192.4
Isoform of Q13162, Peroxiredoxin-4 (Fragment) OS=Homo sapiens OX=9606 GN=PRDX4 PE=1 SV=1	1.419	4.387	0.228	0.853	0.522	0.694	1.444	86.8	123.2	380.9	28.6	14.9	19.8	24.4
Isoform of P02652, Apolipoprotein A-II OS=Homo sapiens OX=9606 GN=APOA2 PE=1 SV=1			#VALUE!	1.446	1.06	1.391	0.719				109.4	115.9	152.2	158.3
UDP-glucuronosyltransferase 2B17 OS=Homo sapiens OX=9606 GN=UGT2B17 PE=1 SV=1	0.85	0.618	1.617	1.522	0.554	0.795	1.257	223	189.6	137.9	33.3	18.4	26.5	50.7
Histidine triad nucleotide-binding protein 2, mitochondrial OS=Homo sapiens OX=9606 GN=HINT2 PE=1 SV=1			#VALUE!				#VALUE!
Protein-glutamine gamma-glutamyltransferase 2 OS=Homo sapiens OX=9606 GN=TGM2 PE=1 SV=2			#VALUE!	1.413	0.77	0.963	1.038				135.2	104.1	130.2	191.1
Peroxiredoxin-5, mitochondrial OS=Homo sapiens OX=9606 GN=PRDX5 PE=1 SV=4	1.128	2.782	0.351	1.103	1.733	1.303	0.768	1.3	1.5	3.7	126.5	219.2	164.8	139.6
Ubiquitin-like modifier-activating enzyme 1 OS=Homo sapiens OX=9606 GN=UBA1 PE=1 SV=3	1.168	1.329	0.753	1.205	0.921	1.224	0.817	100.2	116.9	133.1	66.2	61	81	79.7
Moesin OS=Homo sapiens OX=9606 GN=MSN PE=1 SV=3	1.178	0.598	1.673	1.077	0.569	0.849	1.18	167.3	197.2	100	63.7	36.3	54	68.6
Isoform of P06753, Tropomyosin alpha-3 chain OS=Homo sapiens OX=9606 GN=TPM3 PE=1 SV=1			#VALUE!	1.018	0.531	0.935	1.069				96.1	51.1	89.9	97.8
Isoform of P10635, Cytochrome P450 2D6 (Fragment) OS=Homo sapiens OX=9606 GN=CYP2D6 PE=1 SV=1			#VALUE!				#VALUE!
Isoform of P46952, 3-hydroxyanthranilate 3,4-dioxygenase (Fragment) OS=Homo sapiens OX=9606 GN=HAAO PE=1 SV=8			#VALUE!	0.897	0.954	0.83	1.205				149	142.1	123.7	133.7
Histone H1.3 OS=Homo sapiens OX=9606 GN=HIST1H1D PE=1 SV=2	1.126	2.232	0.448	1.299	0.765	0.832	1.203	64.4	72.5	143.7	91.8	70.2	76.3	119.2
Methylmalonyl-CoA mutase, mitochondrial OS=Homo sapiens OX=9606 GN=MUT PE=1 SV=4			#VALUE!	0.861	0.37	0.612	1.635				281.4	104.1	172.1	242.4
4-trimethylaminobutyraldehyde dehydrogenase OS=Homo sapiens OX=9606 GN=ALDH9A1 PE=1 SV=3	1.002	0.356	2.807	1.088	0.658	0.899	1.112	231	231.6	82.3	49.7	32.7	44.7	54.1
Isoform of P06744, Glucose-6-phosphate isomerase (Fragment) OS=Homo sapiens OX=9606 GN=GPI PE=1 SV=1			#VALUE!	1.014	0.538	0.988	1.012				226	121.5	223.4	229.1
UDP-glucuronosyltransferase 2B15 OS=Homo sapiens OX=9606 GN=UGT2B15 PE=1 SV=3			#VALUE!				#VALUE!
Isoform of P11310, Acyl-Coenzyme A dehydrogenase, C-4 to C-12 straight chain, isoform CRA_a OS=Homo sapiens OX=9606 GN=ACADM PE=1 SV=1			#VALUE!	1.044	0.442	1.029	0.972				159.5	70.5	164.1	166.5
Keratin, type II cytoskeletal 2 epidermal OS=Homo sapiens OX=9606 GN=KRT2 PE=1 SV=2	0.989	1.564	0.639				#VALUE!	225.2	222.6	352.2
Cytochrome P450 3A5 OS=Homo sapiens OX=9606 GN=CYP3A5 PE=1 SV=1			#VALUE!				#VALUE!
Delta-aminolevulinic acid dehydratase OS=Homo sapiens OX=9606 GN=ALAD PE=1 SV=1			#VALUE!	1.142	1.383	0.887	1.127				120.9	167.2	107.3	138.1
Isoform of P22676, Calretinin (Fragment) OS=Homo sapiens OX=9606 GN=CALB2 PE=1 SV=2	1.297	4.147	0.241				#VALUE!	24.5	31.7	101.5
Ras-related protein Rab-1A OS=Homo sapiens OX=9606 GN=RAB1A PE=1 SV=3	1.166	4.35	0.23	1.296	1.236	1.309	0.765	41.4	48.3	180.3	73.4	90.7	96	95.1
Prohibitin OS=Homo sapiens OX=9606 GN=PHB PE=1 SV=1			#VALUE!	0.966	0.595	0.884	1.132				40.3	24	35.6	39
SWISS-PROT:P35527 Tax_Id=9606 Gene_Symbol=KRT9 Keratin, type I cytoskeletal 9	1.223	1.211	0.826				#VALUE!	178.8	218.8	216.5
Guanine nucleotide-binding protein G(o) subunit alpha OS=Homo sapiens OX=9606 GN=GNAO1 PE=1 SV=4	1.186	3.37	0.297	1.123	0.912	1.184	0.845	44.6	52.9	150.2	94.8	86.5	112.2	106.5
NAD kinase 2, mitochondrial OS=Homo sapiens OX=9606 GN=NADK2 PE=1 SV=2			#VALUE!	0.705	0.511	0.745	1.341				128.6	65.7	95.9	90.7
Isoform of P62979, Ubiquitin-40S ribosomal protein S27a (Fragment) OS=Homo sapiens OX=9606 GN=RPS27A PE=1 SV=1	0.975	2.471	0.405	1.127	0.912	1.082	0.924	100	97.5	247.2	52.4	47.8	56.7	59.1
D-beta-hydroxybutyrate dehydrogenase, mitochondrial OS=Homo sapiens OX=9606 GN=BDH1 PE=1 SV=3			#VALUE!	0.88	0.396	0.735	1.361				265.6	105.3	195.2	233.9
Isoform of P46940, Ras GTPase-activating-like protein IQGAP1 OS=Homo sapiens OX=9606 GN=IQGAP1 PE=1 SV=1			#VALUE!				#VALUE!
L-lactate dehydrogenase B chain OS=Homo sapiens OX=9606 GN=LDHB PE=1 SV=2	1.124	2.186	0.458	1.06	1.182	0.942	1.062	66.3	74.5	144.8	95.6	113.1	90	101.3
Histone H2A type 1-A OS=Homo sapiens OX=9606 GN=HIST1H2AA PE=1 SV=3			#VALUE!				#VALUE!
Cell division control protein 42 homolog OS=Homo sapiens OX=9606 GN=CDC42 PE=1 SV=2			#VALUE!				#VALUE!
Proteasome subunit alpha type-2 OS=Homo sapiens OX=9606 GN=PSMA2 PE=1 SV=2			#VALUE!				#VALUE!
Isoform of P29401, Transketolase OS=Homo sapiens OX=9606 GN=TKT PE=1 SV=1	0.879	0.87	1.149				#VALUE!	193	169.7	167.9
14-3-3 protein beta/alpha OS=Homo sapiens OX=9606 GN=YWHAB PE=1 SV=3			#VALUE!				#VALUE!
Isoform of P10632, Cytochrome P450 2C8 OS=Homo sapiens OX=9606 GN=CYP2C8 PE=1 SV=1	0.663	0.378	2.649	0.69	0.332	0.641	1.559	196	129.9	74	114.6	38.1	73.5	79.2
Peroxisomal trans-2-enoyl-CoA reductase OS=Homo sapiens OX=9606 GN=PECR PE=1 SV=2			#VALUE!	0.888	0.669	1.088	0.919				219.5	146.8	238.8	194.8
Cofilin-2 OS=Homo sapiens OX=9606 GN=CFL2 PE=1 SV=1			#VALUE!	1.211	1.063	1.194	0.837				55.8	59.4	66.7	67.6
Endoplasmic reticulum resident protein 29 OS=Homo sapiens OX=9606 GN=ERP29 PE=1 SV=4			#VALUE!	1.002	0.622	0.729	1.372				178.9	111.4	130.4	179.2
Isoform of O00748, Carboxylic ester hydrolase OS=Homo sapiens OX=9606 GN=CES2 PE=1 SV=1			#VALUE!	1.313	0.989	1.572	0.636				164.1	162.3	258.1	215.5
Plastin-2 OS=Homo sapiens OX=9606 GN=LCP1 PE=1 SV=6	1.158	0.696	1.438	1.562	0.857	0.967	1.034	134.6	155.8	93.6	42.9	36.8	41.5	67
T-complex protein 1 subunit zeta OS=Homo sapiens OX=9606 GN=CCT6A PE=1 SV=3			#VALUE!	1.092	2.485	1.277	0.783				136.7	339.6	174.5	149.2
Receptor expression-enhancing protein 6 OS=Homo sapiens OX=9606 GN=REEP6 PE=1 SV=2			#VALUE!				#VALUE!
Glutaryl-CoA dehydrogenase, mitochondrial OS=Homo sapiens OX=9606 GN=GCDH PE=1 SV=1			#VALUE!	0.976	0.974	0.754	1.326				126	122.7	95	123
Galactokinase OS=Homo sapiens OX=9606 GN=GALK1 PE=1 SV=1			#VALUE!	1.108	0.711	1.093	0.915				119.3	84.8	130.4	132.2
Sulfotransferase 1A1 OS=Homo sapiens OX=9606 GN=SULT1A1 PE=1 SV=3	0.853	0.264	3.786	1.228	0.606	0.538	1.855	188.9	161.1	49.9	62.9	38.1	33.9	77.2
Hemopexin OS=Homo sapiens OX=9606 GN=HPX PE=1 SV=2			#VALUE!	1.318	1.536	1.353	0.739				104	159.7	140.8	137.1
Peroxisomal acyl-coenzyme A oxidase 2 OS=Homo sapiens OX=9606 GN=ACOX2 PE=1 SV=1			#VALUE!	0.939	0.588	1.287	0.777				130.5	76.7	168	122.6
Voltage-dependent anion-selective channel protein 1 OS=Homo sapiens OX=9606 GN=VDAC1 PE=1 SV=2	1.251	3.083	0.325	0.86	1.374	0.79	1.265	18.8	23.5	57.9	133.5	183.5	105.5	114.9
Actin-related protein 2/3 complex subunit 4 OS=Homo sapiens OX=9606 GN=ARPC4 PE=1 SV=3	1.285	1.698	0.591	1.153	1.1	1.037	0.964	5.2	6.7	8.8	110.5	121.6	114.6	127.5
Isoform of P27824, Calnexin (Fragment) OS=Homo sapiens OX=9606 GN=CANX PE=1 SV=1	1.366	1.108	0.903	0.904	0.467	0.833	1.201	89.5	122.2	99.1	120.3	56.1	100.2	108.7
Amine oxidase [flavin-containing] B OS=Homo sapiens OX=9606 GN=MAOB PE=1 SV=3			#VALUE!	1.182	0.74	1.276	0.784				124.5	92.1	158.9	147.2
Aldo-keto reductase family 1 member B10 OS=Homo sapiens OX=9606 GN=AKR1B10 PE=1 SV=2	0.556	0.362	2.764				#VALUE!	222.5	123.7	80.5
17-beta-hydroxysteroid dehydrogenase 13 OS=Homo sapiens OX=9606 GN=HSD17B13 PE=1 SV=1	0.889	0.759	1.316	0.635	0.355	0.883	1.132	206.9	184	157.2	10.3	3.7	9.1	6.6
Isoform of Q96AB3, Isochorismatase domain-containing protein 2 (Fragment) OS=Homo sapiens OX=9606 GN=ISOC2 PE=1 SV=8			#VALUE!	0.856	0.626	1.099	0.91				223.4	139.9	245.5	191.2
Sodium/potassium-transporting ATPase subunit beta-1 OS=Homo sapiens OX=9606 GN=ATP1B1 PE=1 SV=1			#VALUE!				#VALUE!
Cathepsin B OS=Homo sapiens OX=9606 GN=CTSB PE=1 SV=3	1.168	0.751	1.331	1.478	0.982	1.084	0.922	124.2	145	93.3	56.9	55.9	61.7	84.1
Thioredoxin domain-containing protein 5 OS=Homo sapiens OX=9606 GN=TXNDC5 PE=1 SV=2	1.487	0.822	1.216	1.116	0.711	1.178	0.849	84.4	125.5	69.4	72.5	51.5	85.4	80.9
T-complex protein 1 subunit theta OS=Homo sapiens OX=9606 GN=CCT8 PE=1 SV=4	0.999	0.937	1.067				#VALUE!	187.1	187	175.4
60S acidic ribosomal protein P0 OS=Homo sapiens OX=9606 GN=RPLP0 PE=1 SV=1			#VALUE!				#VALUE!
Isoform of Q9H8H3, Methyltransferase-like protein 7A (Fragment) OS=Homo sapiens OX=9606 GN=METTL7A PE=1 SV=1			#VALUE!				#VALUE!
Histamine N-methyltransferase OS=Homo sapiens OX=9606 GN=HNMT PE=1 SV=1			#VALUE!				#VALUE!
Dimethylaniline monooxygenase [N-oxide-forming] 5 OS=Homo sapiens OX=9606 GN=FMO5 PE=1 SV=2	0.908	0.963	1.038	1.164	0.682	0.707	1.413	159.6	145	153.7	63.6	43.4	45	74
Visinin-like protein 1 OS=Homo sapiens OX=9606 GN=VSNL1 PE=1 SV=2			#VALUE!				#VALUE!
Succinate-semialdehyde dehydrogenase, mitochondrial OS=Homo sapiens OX=9606 GN=ALDH5A1 PE=1 SV=2			#VALUE!	0.764	0.473	0.786	1.272				111.2	52.6	87.4	85
UDP-glucose 4-epimerase OS=Homo sapiens OX=9606 GN=GALE PE=1 SV=2			#VALUE!	1.077	0.666	0.793	1.261				226.3	150.7	179.5	243.6
Ras-related protein Rab-3D OS=Homo sapiens OX=9606 GN=RAB3D PE=1 SV=1	1.599	13.174	0.076	1.069	0.95	0.944	1.059	12	19.2	158	100.9	95.9	95.3	107.9
Isoform of P02686, Myelin basic protein OS=Homo sapiens OX=9606 GN=MBP PE=1 SV=2	1.089	3.085	0.324				#VALUE!	123.6	134.6	381.2
Isoform of O75521, Enoyl-CoA delta isomerase 2, mitochondrial OS=Homo sapiens OX=9606 GN=ECI2 PE=1 SV=1			#VALUE!	0.929	0.46	0.692	1.446				166.4	76.5	115.1	154.5
Isoform of O75947, ATP synthase peripheral stalk subunit d OS=Homo sapiens OX=9606 GN=ATP5PD PE=1 SV=2			#VALUE!	1.056	0.584	1.031	0.969				217.9	127.2	224.8	230.1
Aldehyde dehydrogenase family 8 member A1 OS=Homo sapiens OX=9606 GN=ALDH8A1 PE=1 SV=1			#VALUE!				#VALUE!
Isoform of P25789, Proteasome subunit alpha type (Fragment) OS=Homo sapiens OX=9606 GN=PSMA4 PE=1 SV=1	1.162	1.04	0.962	0.983	0.705	0.899	1.112	124.9	145.1	129.9	111.5	78.6	100.3	109.6
Isoform of P0C0L5, Complement C4-B OS=Homo sapiens OX=9606 GN=C4B PE=1 SV=1			#VALUE!				#VALUE!
Galectin-1 OS=Homo sapiens OX=9606 GN=LGALS1 PE=1 SV=2			#VALUE!	1.351	1.072	0.744	1.345				151.7	162.6	112.8	204.8
Fibrinogen alpha chain OS=Homo sapiens OX=9606 GN=FGA PE=1 SV=2			#VALUE!	1.244	2.127	1.278	0.783				141.6	301.3	180.9	176.2
Phenazine biosynthesis-like domain-containing protein OS=Homo sapiens OX=9606 GN=PBLD PE=1 SV=2			#VALUE!	1.251	0.663	0.74	1.351				218.9	145.1	162	274
Spectrin beta chain, non-erythrocytic 1 OS=Homo sapiens OX=9606 GN=SPTBN1 PE=1 SV=2	1.089	1.416	0.706				#VALUE!	228.2	248.6	323.2
Phosphoserine aminotransferase OS=Homo sapiens OX=9606 GN=PSAT1 PE=1 SV=2			#VALUE!	0.98	0.592	0.761	1.314				209.7	124.2	159.6	205.5
Isoform of P08727, Keratin, type I cytoskeletal 19 (Fragment) OS=Homo sapiens OX=9606 GN=KRT19 PE=1 SV=1			#VALUE!	0.941	1.761	0.914	1.093				115.8	203.9	105.9	109
14-3-3 protein eta OS=Homo sapiens OX=9606 GN=YWHAH PE=1 SV=4			#VALUE!				#VALUE!
Adenylyl cyclase-associated protein 1 OS=Homo sapiens OX=9606 GN=CAP1 PE=1 SV=5			#VALUE!				#VALUE!
Carboxymethylenebutenolidase homolog OS=Homo sapiens OX=9606 GN=CMBL PE=1 SV=1	0.926	0.682	1.467	0.809	0.438	0.648	1.543	170.9	158.2	116.5	94.1	41.2	61	76.2
Isoform of P30838, Aldehyde dehydrogenase, dimeric NADP-preferring OS=Homo sapiens OX=9606 GN=ALDH3A1 PE=1 SV=1	0.721	0.553	1.81				#VALUE!	351.8	253.8	194.4
Probable phosphoglycerate mutase 4 OS=Homo sapiens OX=9606 GN=PGAM4 PE=3 SV=1			#VALUE!	0.89	0.41	0.793	1.261				258.7	106	205.1	230.2
Glutamine synthetase OS=Homo sapiens OX=9606 GN=GLUL PE=1 SV=4	0.686	1.113	0.898				#VALUE!	225.1	154.5	250.6
Isoform of Q08257, Quinone oxidoreductase (Fragment) OS=Homo sapiens OX=9606 GN=CRYZ PE=1 SV=1	1.105	0.769	1.301	1.059	1.533	1.253	0.798	139.2	153.8	107	82.6	126.6	103.5	87.4
Isovaleryl-CoA dehydrogenase, mitochondrial OS=Homo sapiens OX=9606 GN=IVD PE=1 SV=1			#VALUE!	0.955	0.462	1.144	0.874				179	82.6	204.8	171.1
Transthyretin OS=Homo sapiens OX=9606 GN=TTR PE=1 SV=1			#VALUE!	1.18	1.379	1.333	0.75				115.9	159.8	154.5	136.7
UMP-CMP kinase OS=Homo sapiens OX=9606 GN=CMPK1 PE=1 SV=3			#VALUE!	0.929	0.394	0.771	1.298				258.6	101.8	199.3	240.3
Isoform of P99999, Cytochrome c (Fragment) OS=Homo sapiens OX=9606 GN=CYCS PE=1 SV=1	1.064	5.721	0.175	0.925	1	1.025	0.976	40.4	43	231.4	81.5	81.5	83.5	75.4
Isoform of P63241, Eukaryotic translation initiation factor 5A (Fragment) OS=Homo sapiens OX=9606 GN=EIF5A PE=1 SV=8	1.07	1.569	0.638				#VALUE!	219.9	235.3	344.9
ATP synthase subunit O, mitochondrial OS=Homo sapiens OX=9606 GN=ATP5O PE=1 SV=1	0.929	1.354	0.738	1.009	0.7	0.937	1.067	47.4	44.1	64.2	110.1	77.1	103.2	111.2
Sideroflexin-1 OS=Homo sapiens OX=9606 GN=SFXN1 PE=1 SV=4			#VALUE!				#VALUE!
Membrane-associated progesterone receptor component 1 OS=Homo sapiens OX=9606 GN=PGRMC1 PE=1 SV=3	1.06	0.892	1.122	1.257	1.486	2.073	0.482	76.1	80.6	67.8	77.7	115.5	161.1	97.6
Isoform of P34913, Bifunctional epoxide hydrolase 2 OS=Homo sapiens OX=9606 GN=EPHX2 PE=1 SV=1			#VALUE!	1.295	0.755	0.883	1.133				132.1	99.7	116.6	171
Fumarate hydratase, mitochondrial OS=Homo sapiens OX=9606 GN=FH PE=1 SV=3			#VALUE!	0.936	0.38	0.868	1.152				196.3	74.5	170.4	183.8
Isoform of P07477, Trypsin-1 OS=Homo sapiens OX=9606 GN=PRSS1 PE=1 SV=1			#VALUE!				#VALUE!
Extended synaptotagmin-1 OS=Homo sapiens OX=9606 GN=ESYT1 PE=1 SV=1			#VALUE!				#VALUE!
Sepiapterin reductase OS=Homo sapiens OX=9606 GN=SPR PE=1 SV=1			#VALUE!				#VALUE!
T-complex protein 1 subunit beta OS=Homo sapiens OX=9606 GN=CCT2 PE=1 SV=4			#VALUE!	1.054	0.866	1.133	0.883				197.4	171	223.6	208
Hydroxyacyl-coenzyme A dehydrogenase, mitochondrial OS=Homo sapiens OX=9606 GN=HADH PE=1 SV=3			#VALUE!	1.19	0.556	0.945	1.058				150.9	83.9	142.6	179.6
Glutathione S-transferase kappa 1 OS=Homo sapiens OX=9606 GN=GSTK1 PE=1 SV=3			#VALUE!	0.763	0.495	1.458	0.686				153.7	76.1	224.1	117.3
Proteasome subunit alpha type-7 OS=Homo sapiens OX=9606 GN=PSMA7 PE=1 SV=1	1.074	0.681	1.468				#VALUE!	166.6	179	113.5
Succinate dehydrogenase [ubiquinone] iron-sulfur subunit, mitochondrial OS=Homo sapiens OX=9606 GN=SDHB PE=1 SV=3			#VALUE!	1.022	0.449	0.909	1.1				52.6	23.6	47.8	53.7
POTE ankyrin domain family member J OS=Homo sapiens OX=9606 GN=POTEJ PE=3 SV=1			#VALUE!				#VALUE!
Isoform of P61224, Ras-related protein Rap-1b (Fragment) OS=Homo sapiens OX=9606 GN=RAP1B PE=4 SV=1			#VALUE!	1.053	0.947	0.849	1.178				130.4	123.5	110.7	137.3
Isoform of P31040, Succinate dehydrogenase [ubiquinone] flavoprotein subunit, mitochondrial OS=Homo sapiens OX=9606 GN=SDHA PE=1 SV=1			#VALUE!	0.997	0.573	0.751	1.332				154.4	88.4	115.9	153.9
Isoform of P20962, Parathymosin (Fragment) OS=Homo sapiens OX=9606 GN=PTMS PE=1 SV=1	1.113	1.373	0.728	1.17	0.93	1.132	0.883	100.6	111.9	138.2	10.6	9.8	12	12.4
Importin subunit beta-1 OS=Homo sapiens OX=9606 GN=KPNB1 PE=1 SV=2			#VALUE!				#VALUE!
Isoform of P01011, Alpha-1-antichymotrypsin OS=Homo sapiens OX=9606 GN=SERPINA3 PE=1 SV=1			#VALUE!	1.599	3.51	1.424	0.702				106.2	372.8	151.2	169.8
Fibronectin OS=Homo sapiens OX=9606 GN=FN1 PE=1 SV=4	1.054	0.99	1.01	1.573	0.607	1.436	0.696	131.4	138.5	130.1	86.6	52.6	124.5	136.3
Isoform of P55157, Microsomal triglyceride transfer protein large subunit OS=Homo sapiens OX=9606 GN=MTTP PE=1 SV=1			#VALUE!	1.055	1.554	1.019	0.981				111.3	173	113.4	117.4
UDP-glucuronosyltransferase 2B10 OS=Homo sapiens OX=9606 GN=UGT2B10 PE=1 SV=1			#VALUE!	0.674	0.508	0.782	1.279				269.9	137.1	211.1	182
Isoform of Q9NQC3, Reticulon (Fragment) OS=Homo sapiens OX=9606 GN=RTN4 PE=1 SV=1	0.935	0.932	1.073				#VALUE!	179.1	167.5	166.9
Lambda-crystallin homolog OS=Homo sapiens OX=9606 GN=CRYL1 PE=1 SV=3	0.833	0.808	1.237	0.951	1.047	1.344	0.745	122.1	101.7	98.7	11.7	12.3	15.7	11.1
Cystathionine gamma-lyase OS=Homo sapiens OX=9606 GN=CTH PE=1 SV=3	0.988	0.54	1.85	0.872	0.624	0.523	1.912	158.2	156.3	85.5	132.5	82.7	69.3	115.5
Catechol O-methyltransferase OS=Homo sapiens OX=9606 GN=COMT PE=1 SV=2			#VALUE!				#VALUE!
Very-long-chain 3-oxoacyl-CoA reductase OS=Homo sapiens OX=9606 GN=HSD17B12 PE=1 SV=2			#VALUE!				#VALUE!
Isoform of O75369, Filamin-B OS=Homo sapiens OX=9606 GN=FLNB PE=1 SV=1			#VALUE!	1.241	0.743	1.031	0.969				136.4	101.4	140.7	169.3
Phosphatidylinositol transfer protein alpha isoform OS=Homo sapiens OX=9606 GN=PITPNA PE=1 SV=2			#VALUE!				#VALUE!
Heat shock protein beta-1 OS=Homo sapiens OX=9606 GN=HSPB1 PE=1 SV=2			#VALUE!	0.899	0.764	0.841	1.188				228.3	174.4	192.1	205.2
Isoform of Q7Z406, Myosin-14 (Fragment) OS=Homo sapiens OX=9606 GN=MYH14 PE=1 SV=8			#VALUE!				#VALUE!
Isoform of P63244, Receptor of-activated protein C kinase 1 (Fragment) OS=Homo sapiens OX=9606 GN=RACK1 PE=1 SV=1			#VALUE!	0.993	0.635	0.905	1.105				226.4	143.8	204.9	224.9
Voltage-dependent anion-selective channel protein 3 OS=Homo sapiens OX=9606 GN=VDAC3 PE=1 SV=1			#VALUE!				#VALUE!
Syntaxin-1B OS=Homo sapiens OX=9606 GN=STX1B PE=1 SV=1	1.002	1.5	0.667				#VALUE!	228.5	228.8	342.7
Stathmin OS=Homo sapiens OX=9606 GN=STMN1 PE=1 SV=3	1.315	4.386	0.228				#VALUE!	60.8	79.9	266.5
Pterin-4-alpha-carbinolamine dehydratase OS=Homo sapiens OX=9606 GN=PCBD1 PE=1 SV=2	0.823	0.914	1.094	1.108	0.594	0.773	1.294	146.1	120.3	133.6	66.5	39.5	51.4	73.7
Isoform of P63027, Vesicle-associated membrane protein 2 OS=Homo sapiens OX=9606 GN=VAMP2 PE=4 SV=2			#VALUE!				#VALUE!
Coronin-1A OS=Homo sapiens OX=9606 GN=CORO1A PE=1 SV=4	1.505	1.139	0.878				#VALUE!	219.5	330.5	250
Mitochondrial 10-formyltetrahydrofolate dehydrogenase OS=Homo sapiens OX=9606 GN=ALDH1L2 PE=1 SV=2			#VALUE!				#VALUE!
Isoform of Q96LJ7, Dehydrogenase/reductase (SDR family) member 1, isoform CRA_b OS=Homo sapiens OX=9606 GN=DHRS1 PE=1 SV=1			#VALUE!				#VALUE!
Isoform of Q9UBX3, Mitochondrial dicarboxylate carrier OS=Homo sapiens OX=9606 GN=SLC25A10 PE=1 SV=1			#VALUE!				#VALUE!
Pyruvate kinase PKLR OS=Homo sapiens OX=9606 GN=PKLR PE=1 SV=2			#VALUE!				#VALUE!
Calpain small subunit 1 OS=Homo sapiens OX=9606 GN=CAPNS1 PE=1 SV=1			#VALUE!				#VALUE!
Isoform of P10909, Clusterin (Fragment) OS=Homo sapiens OX=9606 GN=CLU PE=1 SV=1	1.368	0.996	1.004	1.15	1.11	1.416	0.707	118.9	162.7	118.4	85.6	94.9	121.1	98.4
Isoform of Q9UL46, Proteasome activator complex subunit 2 OS=Homo sapiens OX=9606 GN=PSME2 PE=1 SV=1			#VALUE!				#VALUE!
Neurofilament light polypeptide OS=Homo sapiens OX=9606 GN=NEFL PE=1 SV=3	0.94	2.487	0.403				#VALUE!	17	15.9	42.2
PRA1 family protein 3 OS=Homo sapiens OX=9606 GN=ARL6IP5 PE=1 SV=1			#VALUE!				#VALUE!
Serum amyloid P-component OS=Homo sapiens OX=9606 GN=APCS PE=1 SV=2	1.454	0.796	1.256	1.241	1.257	1.153	0.867	123.1	178.9	98	49.4	62.1	57	61.3
Biglycan OS=Homo sapiens OX=9606 GN=BGN PE=1 SV=2			#VALUE!	1.219	0.982	1.165	0.858				132.8	130.5	154.8	161.9
Microtubule-associated protein 1B OS=Homo sapiens OX=9606 GN=MAP1B PE=1 SV=2	1.146	5.264	0.19				#VALUE!	20.9	23.9	109.9
Isoform of Q9NX40, OCIA domain-containing protein 1 (Fragment) OS=Homo sapiens OX=9606 GN=OCIAD1 PE=1 SV=1			#VALUE!				#VALUE!
Isoform of P08397, Porphobilinogen deaminase OS=Homo sapiens OX=9606 GN=HMBS PE=1 SV=1			#VALUE!				#VALUE!
Homogentisate 1,2-dioxygenase OS=Homo sapiens OX=9606 GN=HGD PE=1 SV=2			#VALUE!	0.766	0.34	0.667	1.499				202.3	68.7	135	155
Proteasome subunit alpha type-6 OS=Homo sapiens OX=9606 GN=PSMA6 PE=1 SV=1			#VALUE!	1.113	0.947	1.073	0.932				193.6	183.3	207.8	215.4
Peroxisomal acyl-coenzyme A oxidase 1 OS=Homo sapiens OX=9606 GN=ACOX1 PE=1 SV=3			#VALUE!	1.299	1.064	1.402	0.713				99.5	105.8	139.5	129.2
Isoform of P78329, Cytochrome P450, family 4, subfamily F, polypeptide 2, isoform CRA_a OS=Homo sapiens OX=9606 GN=CYP4F2 PE=1 SV=1			#VALUE!	1.182	0.923	1.055	0.948				56.4	52.1	59.5	66.7
Ribosome-binding protein 1 OS=Homo sapiens OX=9606 GN=RRBP1 PE=1 SV=4			#VALUE!	1.039	0.836	1.235	0.809				194.6	162.7	240.5	202.2
Glutathione hydrolase 5 proenzyme OS=Homo sapiens OX=9606 GN=GGT5 PE=1 SV=2			#VALUE!				#VALUE!
Isoform of P00439, Phenylalanine-4-hydroxylase OS=Homo sapiens OX=9606 GN=PAH PE=1 SV=1	0.982	0.622	1.608				#VALUE!	307.2	301.6	191.1
Isoform of Q9Y4L1, Hypoxia up-regulated protein 1 OS=Homo sapiens OX=9606 GN=HYOU1 PE=1 SV=1			#VALUE!				#VALUE!
Glycogen phosphorylase, brain form OS=Homo sapiens OX=9606 GN=PYGB PE=1 SV=5	1.24	0.706	1.417				#VALUE!	271.6	336.8	191.7
Eukaryotic initiation factor 4A-I OS=Homo sapiens OX=9606 GN=EIF4A1 PE=1 SV=1	1.101	1.024	0.976				#VALUE!	124.2	136.7	127.3
Isoform of P63010, AP-2 complex subunit beta (Fragment) OS=Homo sapiens OX=9606 GN=AP2B1 PE=1 SV=1			#VALUE!				#VALUE!
Myosin regulatory light chain 12B OS=Homo sapiens OX=9606 GN=MYL12B PE=1 SV=2	0.924	0.684	1.46	1.333	0.592	1.22	0.82	153.3	141.7	105	96.5	57.1	117.7	128.6
Isoform of P37837, Transaldolase OS=Homo sapiens OX=9606 GN=TALDO1 PE=1 SV=1			#VALUE!	1.632	1.6	1.492	0.671				139.8	223.6	208.5	228.1
Solute carrier family 2, facilitated glucose transporter member 2 OS=Homo sapiens OX=9606 GN=SLC2A2 PE=1 SV=1	1.001	0.795	1.258	0.955	1.37	0.986	1.017	133.8	134	106.4	23.7	32.4	23.3	22.6
Isoform of A0A0B4J2B5, Immunoglobulin heavy variable 3/OR16-9 (non-functional) OS=Homo sapiens OX=9606 GN=IGHV3OR16-9 PE=1 SV=2			#VALUE!				#VALUE!
Ras-related protein Rab-11A OS=Homo sapiens OX=9606 GN=RAB11A PE=1 SV=3	1.12	2.576	0.388				#VALUE!	170.4	190.8	438.9
Isoform of P62942, Peptidylprolyl isomerase OS=Homo sapiens OX=9606 GN=FKBP1A PE=1 SV=1			#VALUE!				#VALUE!
Cystatin-B OS=Homo sapiens OX=9606 GN=CSTB PE=1 SV=2			#VALUE!	1.303	1.252	1.021	0.979				174.8	219	178.5	227.8
Isoform of P02679, Fibrinogen gamma chain OS=Homo sapiens OX=9606 GN=FGG PE=1 SV=1			#VALUE!				#VALUE!
Proteasome subunit beta type-3 OS=Homo sapiens OX=9606 GN=PSMB3 PE=1 SV=2			#VALUE!				#VALUE!
Putative protein FAM10A4 OS=Homo sapiens OX=9606 GN=ST13P4 PE=5 SV=1			#VALUE!				#VALUE!
Keratin, type II cytoskeletal 1b OS=Homo sapiens OX=9606 GN=KRT77 PE=1 SV=3	0.952	0.784	1.276	0.733	0.811	0.77	1.298	146.2	139.2	114.6	120.7	97.8	93	88.5
Peroxisomal sarcosine oxidase OS=Homo sapiens OX=9606 GN=PIPOX PE=1 SV=2			#VALUE!	1.062	1.52	1.22	0.819				166.6	253.2	203.3	176.9
Isoform of P61160, ARP2 actin-related protein 2 homolog (Yeast), isoform CRA_d OS=Homo sapiens OX=9606 GN=ACTR2 PE=1 SV=2			#VALUE!	1.161	0.942	1.302	0.768				181.6	171	236.5	210.9
Proteasome activator complex subunit 1 OS=Homo sapiens OX=9606 GN=PSME1 PE=1 SV=1	0.952	0.889	1.125	1.116	0.911	1.119	0.893	140.8	134.1	125.2	78.9	71.9	88.4	88.1
Isoform of P16219, Short-chain-specific acyl-CoA dehydrogenase, mitochondrial OS=Homo sapiens OX=9606 GN=ACADS PE=1 SV=1			#VALUE!	1.495	0.688	1.165	0.858				134.9	92.9	157.2	201.6
Carnitine O-palmitoyltransferase 2, mitochondrial OS=Homo sapiens OX=9606 GN=CPT2 PE=1 SV=2			#VALUE!	0.959	0.711	1.295	0.772				201.8	143.4	261.3	193.5
Endophilin-A1 OS=Homo sapiens OX=9606 GN=SH3GL2 PE=1 SV=1			#VALUE!				#VALUE!
Isoform of P02774, Vitamin D-binding protein OS=Homo sapiens OX=9606 GN=GC PE=1 SV=1			#VALUE!	1.635	1.481	1.556	0.643				97.7	144.7	152	159.7
Ubiquitin carboxyl-terminal hydrolase isozyme L1 OS=Homo sapiens OX=9606 GN=UCHL1 PE=1 SV=2	1.005	4.525	0.221				#VALUE!	78	78.4	352.8
Fucose mutarotase OS=Homo sapiens OX=9606 GN=FUOM PE=1 SV=2			#VALUE!				#VALUE!
Immunoglobulin kappa variable 3-20 OS=Homo sapiens OX=9606 GN=IGKV3-20 PE=1 SV=2			#VALUE!	1.285	1.782	2.044	0.489				90	160.3	183.9	115.6
Cytochrome c oxidase subunit 5A, mitochondrial OS=Homo sapiens OX=9606 GN=COX5A PE=1 SV=2	1.073	5.664	0.177	0.966	0.585	0.882	1.133	57.4	61.6	325.1	58	33.9	51.2	56
Kininogen-1 OS=Homo sapiens OX=9606 GN=KNG1 PE=1 SV=2			#VALUE!				#VALUE!
Tubulin polymerization-promoting protein OS=Homo sapiens OX=9606 GN=TPPP PE=1 SV=1			#VALUE!				#VALUE!
Isoform of Q5TCH4, Cytochrome P450 4A22 OS=Homo sapiens OX=9606 GN=CYP4A22 PE=4 SV=1			#VALUE!	1.202	0.633	0.953	1.05				145	91.8	138.1	174.2
Elongation factor 1-gamma OS=Homo sapiens OX=9606 GN=EEF1G PE=1 SV=3	0.8	0.993	1.007	1.06	0.509	1.156	0.865	75.2	60.2	74.7	60.1	30.6	69.5	63.7
40S ribosomal protein S26 OS=Homo sapiens OX=9606 GN=RPS26 PE=1 SV=3			#VALUE!				#VALUE!
Cytochrome P450 1A2 OS=Homo sapiens OX=9606 GN=CYP1A2 PE=1 SV=3			#VALUE!	0.582	0.37	0.455	2.198				185.7	68.7	84.5	108
Isoform of Q99829, Copine-1 OS=Homo sapiens OX=9606 GN=CPNE1 PE=1 SV=1			#VALUE!				#VALUE!
Glycerol-3-phosphate dehydrogenase [NAD(+)], cytoplasmic OS=Homo sapiens OX=9606 GN=GPD1 PE=1 SV=4			#VALUE!	1.067	0.6	0.776	1.289				144.4	86.7	112	154.1
Isoform of P02753, Retinol-binding protein OS=Homo sapiens OX=9606 GN=RBP4 PE=1 SV=2			#VALUE!	1.329	1.761	1.579	0.634				75.2	132.3	118.7	99.9
3-hydroxyisobutyryl-CoA hydrolase, mitochondrial OS=Homo sapiens OX=9606 GN=HIBCH PE=1 SV=2			#VALUE!	0.903	0.471	1.03	0.97				159.6	75.3	164.5	144.1
Uncharacterized protein (Fragment) OS=Homo sapiens OX=9606 PE=4 SV=1	1.128	2.342	0.427	1.156	1.039	0.94	1.063	35.4	39.9	82.9	92.3	95.9	86.8	106.7
Isoform of P62249, 40S ribosomal protein S16 (Fragment) OS=Homo sapiens OX=9606 GN=RPS16 PE=1 SV=1	1.083	0.797	1.254				#VALUE!	277.7	300.9	221.4
Microtubule-associated protein 2 OS=Homo sapiens OX=9606 GN=MAP2 PE=1 SV=4			#VALUE!				#VALUE!
60S ribosomal protein L4 OS=Homo sapiens OX=9606 GN=RPL4 PE=1 SV=5			#VALUE!				#VALUE!
T-complex protein 1 subunit delta OS=Homo sapiens OX=9606 GN=CCT4 PE=1 SV=4	1.258	0.798	1.253				#VALUE!	138.2	173.8	110.3
Amine oxidase [flavin-containing] A OS=Homo sapiens OX=9606 GN=MAOA PE=1 SV=1			#VALUE!	1.139	0.56	1.147	0.872				141.7	79.3	162.5	161.3
Alcohol dehydrogenase class-3 OS=Homo sapiens OX=9606 GN=ADH5 PE=1 SV=4			#VALUE!	0.87	0.458	0.741	1.35				260.7	119.4	193.1	226.8
Isoform of P62879, Guanine nucleotide-binding protein G(I)/G(S)/G(T) subunit beta-2 (Fragment) OS=Homo sapiens OX=9606 GN=GNB2 PE=1 SV=1			#VALUE!				#VALUE!
Isoform of P00387, NADH-cytochrome b5 reductase 3 (Fragment) OS=Homo sapiens OX=9606 GN=CYB5R3 PE=1 SV=1	1.144	0.575	1.742	1.142	1.489	1.187	0.843	41.8	47.8	24	35.5	52.8	42.1	40.5
Mycophenolic acid acyl-glucuronide esterase, mitochondrial OS=Homo sapiens OX=9606 GN=ABHD10 PE=1 SV=1			#VALUE!				#VALUE!
Isoform of P09622, Dihydrolipoyl dehydrogenase OS=Homo sapiens OX=9606 GN=DLD PE=1 SV=1			#VALUE!	1.009	1.021	1.198	0.835				189.2	193.2	226.7	190.9
Isoform of Q15366, Poly(rC)-binding protein 2 OS=Homo sapiens OX=9606 GN=PCBP2 PE=1 SV=1			#VALUE!				#VALUE!
Transcriptional activator protein Pur-alpha OS=Homo sapiens OX=9606 GN=PURA PE=1 SV=2			#VALUE!				#VALUE!
Methyltransferase-like protein 7B OS=Homo sapiens OX=9606 GN=METTL7B PE=1 SV=2	1.009	0.82	1.219				#VALUE!	39	39.3	32
Elongation factor 1-delta OS=Homo sapiens OX=9606 GN=EEF1D PE=1 SV=5	0.921	0.942	1.062	1.1	1.181	1.204	0.832	123.9	114	116.7	21.8	25.8	26.2	24
Proteasome subunit beta type-10 OS=Homo sapiens OX=9606 GN=PSMB10 PE=1 SV=1			#VALUE!				#VALUE!
Serum paraoxonase/lactonase 3 OS=Homo sapiens OX=9606 GN=PON3 PE=1 SV=3			#VALUE!				#VALUE!
40S ribosomal protein S12 OS=Homo sapiens OX=9606 GN=RPS12 PE=1 SV=3	1.243	1.328	0.753				#VALUE!	224	278.4	297.6
Isoform of O95336, 6-phosphogluconolactonase (Fragment) OS=Homo sapiens OX=9606 GN=PGLS PE=1 SV=1			#VALUE!				#VALUE!
Collagen alpha-2(VI) chain OS=Homo sapiens OX=9606 GN=COL6A2 PE=1 SV=4	1.139	1.689	0.592				#VALUE!	76.6	87.2	129.3
Adenine phosphoribosyltransferase OS=Homo sapiens OX=9606 GN=APRT PE=1 SV=2			#VALUE!	1.171	0.724	0.944	1.059				141.9	102.7	134	166.1
Macrophage migration inhibitory factor OS=Homo sapiens OX=9606 GN=MIF PE=1 SV=4	0.887	0.594	1.682	1.114	0.462	0.52	1.926	194.3	172.4	115.5	60.1	27.8	31.2	66.9
Dimethylglycine dehydrogenase, mitochondrial OS=Homo sapiens OX=9606 GN=DMGDH PE=1 SV=2			#VALUE!	1.281	0.508	0.746	1.34				150.5	76.5	112.3	192.8
Ras-related protein Rab-7a OS=Homo sapiens OX=9606 GN=RAB7A PE=1 SV=1			#VALUE!				#VALUE!
Docosahexaenoic acid omega-hydroxylase CYP4F3 OS=Homo sapiens OX=9606 GN=CYP4F3 PE=1 SV=2			#VALUE!	1.054	0.846	0.767	1.305				218.2	184.6	167.2	230
Histone H2A.V OS=Homo sapiens OX=9606 GN=H2AFV PE=1 SV=3	0.733	0.922	1.085	0.826	0.497	0.568	1.76	140.9	103.3	129.9	97.7	48.6	55.5	80.8
Tryptophan--tRNA ligase, cytoplasmic OS=Homo sapiens OX=9606 GN=WARS PE=1 SV=2			#VALUE!				#VALUE!
Isoform of P19404, NADH dehydrogenase [ubiquinone] flavoprotein 2, mitochondrial OS=Homo sapiens OX=9606 GN=NDUFV2 PE=1 SV=1			#VALUE!				#VALUE!
Isoform of P14314, Glucosidase 2 subunit beta OS=Homo sapiens OX=9606 GN=PRKCSH PE=1 SV=1	1.164	0.425	2.354	0.987	0.624	0.841	1.189	177	206	75.2	65.3	40.7	54.9	64.5
Vinculin OS=Homo sapiens OX=9606 GN=VCL PE=1 SV=4			#VALUE!				#VALUE!
60S ribosomal protein L14 OS=Homo sapiens OX=9606 GN=RPL14 PE=1 SV=4			#VALUE!				#VALUE!
Isoform of P49773, Histidine triad nucleotide-binding protein 1 OS=Homo sapiens OX=9606 GN=HINT1 PE=1 SV=1	0.852	0.85	1.175		100	100	#VALUE!	117.9	100.5	100.3		108.9	196.8
26S proteasome non-ATPase regulatory subunit 2 OS=Homo sapiens OX=9606 GN=PSMD2 PE=1 SV=3			#VALUE!				#VALUE!
Isoform of P51572, B-cell receptor-associated protein 31 (Fragment) OS=Homo sapiens OX=9606 GN=BCAP31 PE=1 SV=1			#VALUE!				#VALUE!
Serine/threonine-protein phosphatase 2A 65 kDa regulatory subunit A alpha isoform OS=Homo sapiens OX=9606 GN=PPP2R1A PE=1 SV=4			#VALUE!				#VALUE!
Thioredoxin OS=Homo sapiens OX=9606 GN=TXN PE=1 SV=3			#VALUE!	0.967	0.856	0.895	1.117				159	136.1	142.4	153.8
Isoform of P46782, 40S ribosomal protein S5 OS=Homo sapiens OX=9606 GN=RPS5 PE=1 SV=1			#VALUE!				#VALUE!
Isoform of Q15582, Transforming growth factor-beta-induced protein ig-h3 (Fragment) OS=Homo sapiens OX=9606 GN=TGFBI PE=1 SV=1			#VALUE!	1.486	0.735	1.24	0.806				179.3	131.8	222.4	266.5
Ribonuclease inhibitor OS=Homo sapiens OX=9606 GN=RNH1 PE=1 SV=2			#VALUE!				#VALUE!
Ubiquitin carboxyl-terminal hydrolase 5 OS=Homo sapiens OX=9606 GN=USP5 PE=1 SV=2			#VALUE!				#VALUE!
Proteasome subunit alpha type-1 OS=Homo sapiens OX=9606 GN=PSMA1 PE=1 SV=1	1.046	0.988	1.012	0.977	0.827	0.759	1.317	106	110.9	104.7	73.9	61.2	56.1	72.2
Galectin-4 OS=Homo sapiens OX=9606 GN=LGALS4 PE=1 SV=1	0.895	0.915	1.094	0.458	0.551	0.684	1.462	104.7	93.7	95.7	124.4	68.6	85.1	57.1
ATP-dependent 6-phosphofructokinase, liver type OS=Homo sapiens OX=9606 GN=PFKL PE=1 SV=6			#VALUE!				#VALUE!
Histone H3.3 OS=Homo sapiens OX=9606 GN=H3F3A PE=1 SV=2	0.873	0.922	1.085	0.999	0.287	0.671	1.49	105.6	92.2	97.3	103.4	29.7	69.4	103.3
Thymosin beta-4 OS=Homo sapiens OX=9606 GN=TMSB4X PE=1 SV=2			#VALUE!				#VALUE!
Apolipoprotein E OS=Homo sapiens OX=9606 GN=APOE PE=1 SV=1	1.101	1.838	0.544	1.683	0.927	1.836	0.544	76.7	84.4	141	6.2	5.8	11.4	10.5
Alpha-actinin-2 OS=Homo sapiens OX=9606 GN=ACTN2 PE=1 SV=1			#VALUE!	1.34	0.852	1.452	0.688				40.1	34.2	58.3	53.8
Elongation factor Tu, mitochondrial OS=Homo sapiens OX=9606 GN=TUFM PE=1 SV=2			#VALUE!	1.039	0.594	1.201	0.833				133.8	79.4	160.7	139
Fructose-1,6-bisphosphatase isozyme 2 OS=Homo sapiens OX=9606 GN=FBP2 PE=1 SV=2			#VALUE!				#VALUE!
Ketohexokinase OS=Homo sapiens OX=9606 GN=KHK PE=1 SV=2			#VALUE!	0.9	0.762	0.96	1.042				157.6	120.2	151.3	141.8
Neurotrimin OS=Homo sapiens OX=9606 GN=NTM PE=1 SV=1	1.112	4.097	0.244				#VALUE!	71.9	80	294.8
Isoform of P43307, Translocon-associated protein subunit alpha OS=Homo sapiens OX=9606 GN=SSR1 PE=1 SV=1			#VALUE!	1.001	0.43	0.879	1.139				137.1	59	120.4	137.2
40S ribosomal protein S13 OS=Homo sapiens OX=9606 GN=RPS13 PE=1 SV=2			#VALUE!				#VALUE!
Coatomer subunit gamma-1 OS=Homo sapiens OX=9606 GN=COPG1 PE=1 SV=1			#VALUE!				#VALUE!
Glutaredoxin-1 OS=Homo sapiens OX=9606 GN=GLRX PE=1 SV=2			#VALUE!	1.073	1.52	1.459	0.685				158.3	240.7	231	169.9
Synaptosomal-associated protein 25 OS=Homo sapiens OX=9606 GN=SNAP25 PE=1 SV=1	1.246	4.613	0.216				#VALUE!	14.2	17.7	65.6
V-type proton ATPase subunit B, brain isoform OS=Homo sapiens OX=9606 GN=ATP6V1B2 PE=1 SV=3			#VALUE!				#VALUE!
Apolipoprotein C-III OS=Homo sapiens OX=9606 GN=APOC3 PE=1 SV=1			#VALUE!				#VALUE!
NADH dehydrogenase [ubiquinone] iron-sulfur protein 3, mitochondrial OS=Homo sapiens OX=9606 GN=NDUFS3 PE=1 SV=1			#VALUE!				#VALUE!
Cytochrome c oxidase subunit 2 OS=Homo sapiens OX=9606 GN=MT-CO2 PE=1 SV=1			#VALUE!	0.946	0.501	0.786	1.271				172	86.2	135.3	162.6
Acyl-coenzyme A thioesterase 1 OS=Homo sapiens OX=9606 GN=ACOT1 PE=1 SV=1			#VALUE!	0.864	1.039	1.128	0.887				198.5	206.1	223.9	171.5
Proteasome subunit alpha type-3 OS=Homo sapiens OX=9606 GN=PSMA3 PE=1 SV=2			#VALUE!	1.084	1.253	1.018	0.982				183.7	230.2	187	199.1
Isoform of P00450, Ceruloplasmin OS=Homo sapiens OX=9606 GN=CP PE=1 SV=1			#VALUE!				#VALUE!
Alpha-1-acid glycoprotein 1 OS=Homo sapiens OX=9606 GN=ORM1 PE=1 SV=1			#VALUE!				#VALUE!
Isoform of P50454, Serpin H1 (Fragment) OS=Homo sapiens OX=9606 GN=SERPINH1 PE=1 SV=1			#VALUE!				#VALUE!
Isoform of Q02818, Nucleobindin-1 (Fragment) OS=Homo sapiens OX=9606 GN=NUCB1 PE=1 SV=1			#VALUE!				#VALUE!
Regucalcin OS=Homo sapiens OX=9606 GN=RGN PE=1 SV=1			#VALUE!	1.164	0.894	0.655	1.527				215.4	192.6	141.1	250.9
GTP-binding protein SAR1a OS=Homo sapiens OX=9606 GN=SAR1A PE=1 SV=1			#VALUE!				#VALUE!
Obg-like ATPase 1 OS=Homo sapiens OX=9606 GN=OLA1 PE=1 SV=2			#VALUE!				#VALUE!
Isoform of Q9ULA0, Aspartyl aminopeptidase (Fragment) OS=Homo sapiens OX=9606 GN=DNPEP PE=1 SV=2			#VALUE!				#VALUE!
Lactoylglutathione lyase OS=Homo sapiens OX=9606 GN=GLO1 PE=1 SV=4			#VALUE!				#VALUE!
Annexin A7 OS=Homo sapiens OX=9606 GN=ANXA7 PE=1 SV=3	0.842	0.702	1.426				#VALUE!	314.5	264.9	220.6
Isoform of P09429, High mobility group protein B1 OS=Homo sapiens OX=9606 GN=HMGB1 PE=1 SV=1			#VALUE!				#VALUE!
Adenylate kinase isoenzyme 1 OS=Homo sapiens OX=9606 GN=AK1 PE=1 SV=3			#VALUE!				#VALUE!
Isoform of Q9H0W9, Ester hydrolase C11orf54 (Fragment) OS=Homo sapiens OX=9606 GN=C11orf54 PE=1 SV=1			#VALUE!				#VALUE!
Isoform of Q14353, Guanidinoacetate N-methyltransferase OS=Homo sapiens OX=9606 GN=GAMT PE=1 SV=1			#VALUE!				#VALUE!
F-actin-capping protein subunit alpha-1 OS=Homo sapiens OX=9606 GN=CAPZA1 PE=1 SV=3			#VALUE!	1.097	0.653	0.982	1.019				133.7	87.3	131.2	146.6
V-type proton ATPase catalytic subunit A OS=Homo sapiens OX=9606 GN=ATP6V1A PE=1 SV=2			#VALUE!				#VALUE!
Isoform of P49721, Proteasome subunit beta type-2 OS=Homo sapiens OX=9606 GN=PSMB2 PE=1 SV=1	1.002	0.813	1.229	1.127	0.981	0.938	1.067	80.4	80.6	65.4	98.9	97	92.7	111.5
Cytochrome c oxidase subunit 4 isoform 1, mitochondrial OS=Homo sapiens OX=9606 GN=COX4I1 PE=1 SV=1			#VALUE!	0.94	0.457	0.799	1.251				250.3	114.3	200.1	235.3
Isoform of P08571, Monocyte differentiation antigen CD14 (Fragment) OS=Homo sapiens OX=9606 GN=CD14 PE=1 SV=1			#VALUE!				#VALUE!
Isoform of P37802, Transgelin-2 (Fragment) OS=Homo sapiens OX=9606 GN=TAGLN2 PE=1 SV=1			#VALUE!				#VALUE!
Mitochondrial carnitine/acylcarnitine carrier protein OS=Homo sapiens OX=9606 GN=SLC25A20 PE=1 SV=1			#VALUE!				#VALUE!
Isoform of Q01995, Transgelin (Fragment) OS=Homo sapiens OX=9606 GN=TAGLN PE=1 SV=1			#VALUE!	1.533	1.574	1.065	0.939				119.9	188.7	127.7	183.8
Dolichyl-diphosphooligosaccharide--protein glycosyltransferase subunit 2 OS=Homo sapiens OX=9606 GN=RPN2 PE=1 SV=3	1.004	0.652	1.533				#VALUE!	301.1	302.5	196.4
Isoform of P05455, Lupus La protein (Fragment) OS=Homo sapiens OX=9606 GN=SSB PE=1 SV=1			#VALUE!				#VALUE!
Clathrin light chain B OS=Homo sapiens OX=9606 GN=CLTB PE=1 SV=1			#VALUE!				#VALUE!
Isoform of P36543, V-type proton ATPase subunit E 1 (Fragment) OS=Homo sapiens OX=9606 GN=ATP6V1E1 PE=1 SV=1			#VALUE!				#VALUE!
Isoform of P06748, Nucleophosmin (Fragment) OS=Homo sapiens OX=9606 GN=NPM1 PE=1 SV=1			#VALUE!	0.998	0.765	0.911	1.097				157.7	120.7	143.7	157.4
Isoform of P22695, Cytochrome b-c1 complex subunit 2, mitochondrial OS=Homo sapiens OX=9606 GN=UQCRC2 PE=1 SV=1			#VALUE!				#VALUE!
Microsomal glutathione S-transferase 1 OS=Homo sapiens OX=9606 GN=MGST1 PE=1 SV=1			#VALUE!				#VALUE!
UV excision repair protein RAD23 homolog B OS=Homo sapiens OX=9606 GN=RAD23B PE=1 SV=1			#VALUE!	1.206	0.81	0.901	1.11				204.2	165.5	184	246.3
60S ribosomal protein L12 OS=Homo sapiens OX=9606 GN=RPL12 PE=1 SV=1			#VALUE!				#VALUE!
Ubiquilin-1 OS=Homo sapiens OX=9606 GN=UBQLN1 PE=1 SV=2			#VALUE!				#VALUE!
ATP synthase subunit gamma, mitochondrial OS=Homo sapiens OX=9606 GN=ATP5F1C PE=1 SV=1			#VALUE!	0.848	0.669	0.747	1.339				245.1	164.1	183	207.9
Isoform of P28161, Glutathione S-transferase Mu 2 OS=Homo sapiens OX=9606 GN=GSTM2 PE=1 SV=2			#VALUE!	0.81	0.41	0.438	2.286				154.1	63.1	67.4	124.8
Very long-chain acyl-CoA synthetase OS=Homo sapiens OX=9606 GN=SLC27A2 PE=1 SV=2			#VALUE!				#VALUE!
Redox-regulatory protein FAM213A OS=Homo sapiens OX=9606 GN=FAM213A PE=1 SV=3			#VALUE!				#VALUE!
Complement factor H OS=Homo sapiens OX=9606 GN=CFH PE=1 SV=4	1.304	0.983	1.017	1.474	1.575	1.353	0.732	164	213.8	161.3	4.1	6.5	5.6	6.1
Isoform of Q12905, Interleukin enhancer-binding factor 2 OS=Homo sapiens OX=9606 GN=ILF2 PE=1 SV=1			#VALUE!				#VALUE!
Cystathionine beta-synthase-like protein OS=Homo sapiens OX=9606 GN=CBSL PE=1 SV=1			#VALUE!	0.88	0.569	0.736	1.359				126.7	72.1	93.2	111.6
Acylpyruvase FAHD1, mitochondrial OS=Homo sapiens OX=9606 GN=FAHD1 PE=1 SV=2			#VALUE!				#VALUE!
Haloacid dehalogenase-like hydrolase domain-containing protein 2 OS=Homo sapiens OX=9606 GN=HDHD2 PE=1 SV=1	1.294	1.849	0.541				#VALUE!	193.1	249.8	357.1
Erythrocyte band 7 integral membrane protein OS=Homo sapiens OX=9606 GN=STOM PE=1 SV=3			#VALUE!	1.072	0.694	0.792	1.263				224.9	156.1	178	241
Complexin-2 OS=Homo sapiens OX=9606 GN=CPLX2 PE=2 SV=2			#VALUE!				#VALUE!
Myeloid-derived growth factor OS=Homo sapiens OX=9606 GN=MYDGF PE=1 SV=1			#VALUE!				#VALUE!
Nascent polypeptide-associated complex subunit alpha-2 OS=Homo sapiens OX=9606 GN=NACA2 PE=1 SV=1			#VALUE!				#VALUE!
60S acidic ribosomal protein P1 OS=Homo sapiens OX=9606 GN=RPLP1 PE=1 SV=1			#VALUE!				#VALUE!
ATP synthase subunit delta, mitochondrial OS=Homo sapiens OX=9606 GN=ATP5F1D PE=1 SV=2	1.173	4.198	0.238				#VALUE!	75.5	88.6	317
Isoform of Q99622, Protein C10 OS=Homo sapiens OX=9606 GN=C12orf57 PE=1 SV=1			#VALUE!				#VALUE!
Sodium/potassium-transporting ATPase subunit beta-2 OS=Homo sapiens OX=9606 GN=ATP1B2 PE=1 SV=3			#VALUE!				#VALUE!
Isoform of P12532, Creatine kinase U-type, mitochondrial OS=Homo sapiens OX=9606 GN=CKMT1A PE=1 SV=1	1.173	5.262	0.19				#VALUE!	107.6	126.2	566.2
Vitronectin OS=Homo sapiens OX=9606 GN=VTN PE=1 SV=1			#VALUE!				#VALUE!
26S proteasome non-ATPase regulatory subunit 11 OS=Homo sapiens OX=9606 GN=PSMD11 PE=1 SV=3			#VALUE!				#VALUE!
Alpha-centractin OS=Homo sapiens OX=9606 GN=ACTR1A PE=1 SV=1			#VALUE!				#VALUE!
Cytochrome b-c1 complex subunit 7 OS=Homo sapiens OX=9606 GN=UQCRB PE=1 SV=2	1.102	2.347	0.426	1.047	0.447	1.094	0.914	112.3	123.8	263.6	39.1	17.5	42.8	41
Alpha-1B-glycoprotein OS=Homo sapiens OX=9606 GN=A1BG PE=1 SV=4			#VALUE!	1.126	1.452	1.179	0.849				96.5	140.1	113.7	108.6
Calcium-regulated heat-stable protein 1 OS=Homo sapiens OX=9606 GN=CARHSP1 PE=1 SV=2			#VALUE!				#VALUE!
Protein S100-A9 OS=Homo sapiens OX=9606 GN=S100A9 PE=1 SV=1			#VALUE!				#VALUE!
Isoform of Q9NQR4, Omega-amidase NIT2 (Fragment) OS=Homo sapiens OX=9606 GN=NIT2 PE=1 SV=8	1.096	0.553	1.813	0.902	0.655	0.706	1.417	8.7	9.6	4.8	122.6	80.3	86.5	110.5
Adenosylhomocysteinase OS=Homo sapiens OX=9606 GN=AHCY PE=1 SV=4	0.761	1.4	0.715	1.076	0.921	1.033	0.968	18.1	13.7	25.3	133.8	123.2	138.2	144
Aldose 1-epimerase OS=Homo sapiens OX=9606 GN=GALM PE=1 SV=1			#VALUE!				#VALUE!
Isoform of P09211, Glutathione S-transferase P (Fragment) OS=Homo sapiens OX=9606 GN=GSTP1 PE=1 SV=1			#VALUE!				#VALUE!
Fibrinogen beta chain OS=Homo sapiens OX=9606 GN=FGB PE=1 SV=2	1.081	0.858	1.165	1.442	0.766	1.027	0.974	136.1	147.1	116.8	94.5	72.4	97	136.2
Isoform of P61018, HCG1995540, isoform CRA_b OS=Homo sapiens OX=9606 GN=RAB4B PE=1 SV=1			#VALUE!				#VALUE!
Isoform of Q15436, Protein transport protein Sec23A OS=Homo sapiens OX=9606 GN=SEC23A PE=1 SV=1			#VALUE!				#VALUE!
Isoform of Q86WA6, Valacyclovir hydrolase (Fragment) OS=Homo sapiens OX=9606 GN=BPHL PE=1 SV=1			#VALUE!	1.07	0.246	0.992	1.008				146.3	36	145.1	156.5
Arylacetamide deacetylase OS=Homo sapiens OX=9606 GN=AADAC PE=1 SV=5	1.083	0.633	1.58				#VALUE!	190.7	206.6	120.7
Isoform of P62899, 60S ribosomal protein L31 (Fragment) OS=Homo sapiens OX=9606 GN=RPL31 PE=1 SV=1			#VALUE!				#VALUE!
Isoform of Q13510, Acid ceramidase OS=Homo sapiens OX=9606 GN=ASAH1 PE=1 SV=1			#VALUE!	1.505	1.14	1.135	0.881				37.9	43.1	43	57
40S ribosomal protein S25 OS=Homo sapiens OX=9606 GN=RPS25 PE=1 SV=1	0.986	0.948	1.055				#VALUE!	272.7	268.8	258.5
Heme-binding protein 1 OS=Homo sapiens OX=9606 GN=HEBP1 PE=1 SV=1			#VALUE!				#VALUE!
26S proteasome regulatory subunit 6B OS=Homo sapiens OX=9606 GN=PSMC4 PE=1 SV=2			#VALUE!				#VALUE!
Isoform of O00764, Pyridoxal kinase OS=Homo sapiens OX=9606 GN=PDXK PE=1 SV=1			#VALUE!				#VALUE!
Putative L-aspartate dehydrogenase OS=Homo sapiens OX=9606 GN=ASPDH PE=1 SV=2			#VALUE!	1.046	0.606	0.772	1.296				179.4	108.7	138.4	187.6
Isoform of P63098, Calcineurin subunit B type 1 OS=Homo sapiens OX=9606 GN=PPP3R1 PE=1 SV=1			#VALUE!				#VALUE!
Apoptosis-inducing factor 1, mitochondrial OS=Homo sapiens OX=9606 GN=AIFM1 PE=1 SV=1			#VALUE!				#VALUE!
GDH/6PGL endoplasmic bifunctional protein OS=Homo sapiens OX=9606 GN=H6PD PE=1 SV=2			#VALUE!				#VALUE!
Isoform of Q05682, Caldesmon (Fragment) OS=Homo sapiens OX=9606 GN=CALD1 PE=1 SV=1			#VALUE!				#VALUE!
Isoform of Q15435, Protein phosphatase 1 regulatory subunit 7 (Fragment) OS=Homo sapiens OX=9606 GN=PPP1R7 PE=1 SV=1			#VALUE!				#VALUE!
Peptidyl-prolyl cis-trans isomerase FKBP2 OS=Homo sapiens OX=9606 GN=FKBP2 PE=1 SV=2			#VALUE!				#VALUE!
Isoform of P11177, Pyruvate dehydrogenase E1 component subunit beta, mitochondrial OS=Homo sapiens OX=9606 GN=PDHB PE=1 SV=1			#VALUE!				#VALUE!
Cytochrome c oxidase subunit 7C, mitochondrial OS=Homo sapiens OX=9606 GN=COX7C PE=1 SV=1	1.448	3.448	0.29	0.912	0.677	1.073	0.933	40.9	59.3	141.1	103.7	70.2	111.2	94.5
Neuroblast differentiation-associated protein AHNAK OS=Homo sapiens OX=9606 GN=AHNAK PE=1 SV=2	1.279	2.007	0.498				#VALUE!	116	148.3	232.8
Heterogeneous nuclear ribonucleoproteins A2/B1 OS=Homo sapiens OX=9606 GN=HNRNPA2B1 PE=1 SV=2			#VALUE!				#VALUE!
Isoform of P02794, Ferritin (Fragment) OS=Homo sapiens OX=9606 GN=FTH1 PE=1 SV=1			#VALUE!	2.068	0.799	1.585	0.631				108.9	86.9	172.6	225.1
Isoform of Q9UN36, Protein NDRG2 (Fragment) OS=Homo sapiens OX=9606 GN=NDRG2 PE=1 SV=1			#VALUE!				#VALUE!
Hydroxyacylglutathione hydrolase, mitochondrial OS=Homo sapiens OX=9606 GN=HAGH PE=1 SV=2			#VALUE!	1.081	0.839	0.877	1.14				210.7	176.8	184.8	227.7
Proteasome subunit beta type-1 OS=Homo sapiens OX=9606 GN=PSMB1 PE=1 SV=2			#VALUE!				#VALUE!
Immunoglobulin heavy variable 3-48 OS=Homo sapiens OX=9606 GN=IGHV3-48 PE=1 SV=2			#VALUE!				#VALUE!
LIM and SH3 domain protein 1 OS=Homo sapiens OX=9606 GN=LASP1 PE=1 SV=2			#VALUE!	1.28	1.365	1.098	0.912				61	83.2	66.9	78
Isoform of P17931, Galectin OS=Homo sapiens OX=9606 GN=LGALS3 PE=1 SV=1	1.078	1.849	0.541	1.294	1.062	1.295	0.772	101.9	109.8	188.3	52.7	56	68.3	68.2
Xanthine dehydrogenase/oxidase OS=Homo sapiens OX=9606 GN=XDH PE=1 SV=4			#VALUE!				#VALUE!
40S ribosomal protein SA OS=Homo sapiens OX=9606 GN=RPSA PE=1 SV=4	0.863	1.851	0.54	1.048	0.658	0.972	1.028	68.3	58.9	126.4	104.8	69	101.9	109.8
Isoform of O00410, Importin-5 (Fragment) OS=Homo sapiens OX=9606 GN=IPO5 PE=1 SV=1			#VALUE!				#VALUE!
Heterogeneous nuclear ribonucleoprotein F OS=Homo sapiens OX=9606 GN=HNRNPF PE=1 SV=3			#VALUE!				#VALUE!
Putative cytochrome b-c1 complex subunit Rieske-like protein 1 OS=Homo sapiens OX=9606 GN=UQCRFS1P1 PE=5 SV=1			#VALUE!	1.09	0.901	1.271	0.787				110.1	99.2	139.9	120
Uncharacterized protein (Fragment) OS=Homo sapiens OX=9606 PE=4 SV=10	1.016	1.066	0.938	1.021	0.742	0.608	1.644	129.8	131.8	138.4	96.2	71.3	58.5	98.2
Glycine dehydrogenase (decarboxylating), mitochondrial OS=Homo sapiens OX=9606 GN=GLDC PE=1 SV=2			#VALUE!				#VALUE!
Isoform of O75352, Mannose-P-dolichol utilization defect 1 protein (Fragment) OS=Homo sapiens OX=9606 GN=MPDU1 PE=1 SV=1			#VALUE!				#VALUE!
26S proteasome non-ATPase regulatory subunit 8 OS=Homo sapiens OX=9606 GN=PSMD8 PE=1 SV=2			#VALUE!				#VALUE!
Isoform of P62140, Serine/threonine-protein phosphatase PP1-beta catalytic subunit OS=Homo sapiens OX=9606 GN=PPP1CB PE=1 SV=1			#VALUE!				#VALUE!
N(G),N(G)-dimethylarginine dimethylaminohydrolase 1 OS=Homo sapiens OX=9606 GN=DDAH1 PE=1 SV=3			#VALUE!	1.743	1.052	1.236	0.809				99.5	104.6	123	173.3
Isoform of Q13576, Ras GTPase-activating-like protein IQGAP2 (Fragment) OS=Homo sapiens OX=9606 GN=IQGAP2 PE=1 SV=1			#VALUE!	1.029	0.454	0.931	1.073				46.9	21.3	43.7	48.3
40S ribosomal protein S19 OS=Homo sapiens OX=9606 GN=RPS19 PE=1 SV=2			#VALUE!	1.067	0.575	0.926	1.079				29.9	17.2	27.7	31.9
Isoform of P24534, Elongation factor 1-beta (Fragment) OS=Homo sapiens OX=9606 GN=EEF1B2 PE=1 SV=1			#VALUE!				#VALUE!
Poly(rC)-binding protein 1 OS=Homo sapiens OX=9606 GN=PCBP1 PE=1 SV=2			#VALUE!				#VALUE!
Alanine--tRNA ligase, cytoplasmic OS=Homo sapiens OX=9606 GN=AARS PE=1 SV=2			#VALUE!				#VALUE!
Bile acid-CoA:amino acid N-acyltransferase OS=Homo sapiens OX=9606 GN=BAAT PE=1 SV=1			#VALUE!	1.007	1.114	1.957	0.511				113.6	126.5	222.2	114.4
Guanine nucleotide-binding protein G(I)/G(S)/G(T) subunit beta-1 OS=Homo sapiens OX=9606 GN=GNB1 PE=1 SV=3	1.143	1.674	0.597				#VALUE!	80.9	92.5	135.5
Isoform of P31943, Heterogeneous nuclear ribonucleoprotein H OS=Homo sapiens OX=9606 GN=HNRNPH1 PE=1 SV=1			#VALUE!				#VALUE!
Ribose-phosphate pyrophosphokinase 1 OS=Homo sapiens OX=9606 GN=PRPS1 PE=1 SV=2			#VALUE!	1.087	1.523	1.985	0.504				143	217.8	283.8	155.4
40S ribosomal protein S7 OS=Homo sapiens OX=9606 GN=RPS7 PE=1 SV=1			#VALUE!				#VALUE!
Chloride intracellular channel protein 1 OS=Homo sapiens OX=9606 GN=CLIC1 PE=1 SV=4			#VALUE!	1.296	0.889	1.108	0.903				125.1	111.2	138.6	162.1
Isoform of P07585, Decorin (Fragment) OS=Homo sapiens OX=9606 GN=DCN PE=1 SV=1			#VALUE!				#VALUE!
Isoform of Q16134, Electron transfer flavoprotein-ubiquinone oxidoreductase, mitochondrial (Fragment) OS=Homo sapiens OX=9606 GN=ETFDH PE=1 SV=1			#VALUE!				#VALUE!
Enoyl-CoA delta isomerase 1, mitochondrial OS=Homo sapiens OX=9606 GN=ECI1 PE=1 SV=1			#VALUE!				#VALUE!
Fibrillin-1 OS=Homo sapiens OX=9606 GN=FBN1 PE=1 SV=3	1.084	0.539	1.857				#VALUE!	195.7	212.2	105.4
Syntaxin-binding protein 1 OS=Homo sapiens OX=9606 GN=STXBP1 PE=1 SV=1			#VALUE!				#VALUE!
Major vault protein OS=Homo sapiens OX=9606 GN=MVP PE=1 SV=4	1.028	0.84	1.19				#VALUE!	278.9	286.7	234.4
Isoform of P49368, T-complex protein 1 subunit gamma OS=Homo sapiens OX=9606 GN=CCT3 PE=1 SV=1	1.115	1.023	0.977				#VALUE!	134.5	149.9	137.6
Isoform of P04114, Apolipoprotein B-100 OS=Homo sapiens OX=9606 GN=APOB PE=1 SV=2			#VALUE!	1.519	0.546	1.762	0.568				165.7	90.5	291.9	251.8
Isoform of P23588, Eukaryotic translation initiation factor 4B (Fragment) OS=Homo sapiens OX=9606 GN=EIF4B PE=1 SV=1			#VALUE!				#VALUE!
CDGSH iron-sulfur domain-containing protein 1 OS=Homo sapiens OX=9606 GN=CISD1 PE=1 SV=1			#VALUE!				#VALUE!
Membrane-associated progesterone receptor component 2 OS=Homo sapiens OX=9606 GN=PGRMC2 PE=1 SV=1			#VALUE!				#VALUE!
Isoform of O43708, Maleylacetoacetate isomerase OS=Homo sapiens OX=9606 GN=GSTZ1 PE=1 SV=1	0.607	0.888	1.126				#VALUE!	320.6	194.7	284.7
Dynein light chain 2, cytoplasmic OS=Homo sapiens OX=9606 GN=DYNLL2 PE=1 SV=1	1.349	3.563	0.281				#VALUE!	49	66.1	174.5
Histidine-rich glycoprotein OS=Homo sapiens OX=9606 GN=HRG PE=1 SV=1			#VALUE!	0.947	0.713	1.066	0.938				214.7	153.1	228.9	203.3
Isoform of P09496, Clathrin light chain OS=Homo sapiens OX=9606 GN=CLTA PE=1 SV=1	1.138	3.526	0.284				#VALUE!	87.5	99.5	308.5
60S ribosomal protein L11 OS=Homo sapiens OX=9606 GN=RPL11 PE=1 SV=2			#VALUE!				#VALUE!
Isoform of Q99623, Prohibitin-2 (Fragment) OS=Homo sapiens OX=9606 GN=PHB2 PE=1 SV=2			#VALUE!	0.977	0.737	0.8	1.25				133	98	106.4	130
Isoform of Q9Y6C9, Mitochondrial carrier homolog 2 (Fragment) OS=Homo sapiens OX=9606 GN=MTCH2 PE=1 SV=8			#VALUE!	1.065	0.672	0.891	1.123				220.5	148.2	196.4	234.9
ProSAAS OS=Homo sapiens OX=9606 GN=PCSK1N PE=1 SV=1			#VALUE!				#VALUE!
Choline dehydrogenase, mitochondrial OS=Homo sapiens OX=9606 GN=CHDH PE=1 SV=2			#VALUE!	1.278	0.754	0.976	1.025				95.9	72.3	93.6	122.5
Isoform of Q15008, 26S proteasome non-ATPase regulatory subunit 6 (Fragment) OS=Homo sapiens OX=9606 GN=PSMD6 PE=1 SV=1			#VALUE!				#VALUE!
Rho GDP-dissociation inhibitor 1 OS=Homo sapiens OX=9606 GN=ARHGDIA PE=1 SV=3			#VALUE!				#VALUE!
Isoform of P60763, Ras-related C3 botulinum toxin substrate 3 (Fragment) OS=Homo sapiens OX=9606 GN=RAC3 PE=1 SV=1	1.091	1.419	0.705				#VALUE!	153.4	167.3	217.7
Immunoglobulin kappa variable 1-27 OS=Homo sapiens OX=9606 GN=IGKV1-27 PE=3 SV=1			#VALUE!				#VALUE!
Ras suppressor protein 1 OS=Homo sapiens OX=9606 GN=RSU1 PE=1 SV=3			#VALUE!				#VALUE!
Isoform of P15121, Aldose reductase OS=Homo sapiens OX=9606 GN=AKR1B1 PE=1 SV=1			#VALUE!	0.854	1.036	0.67	1.493				224.7	232.9	150.5	191.9
Isoform of P62750, 60S ribosomal protein L23a (Fragment) OS=Homo sapiens OX=9606 GN=RPL23A PE=1 SV=1	100	100	#VALUE!				#VALUE!		56.8	61.4
Isoform of P07910, Heterogeneous nuclear ribonucleoproteins C1/C2 OS=Homo sapiens OX=9606 GN=HNRNPC PE=1 SV=1			#VALUE!	1.066	1.047	1.005	0.995				194.3	203.4	195.3	207.1
Collagen alpha-1(XVIII) chain OS=Homo sapiens OX=9606 GN=COL18A1 PE=1 SV=5			#VALUE!	1.416	1.132	1.689	0.592				152.8	172.9	258.1	216.3
Isoform of O75396, Vesicle-trafficking protein SEC22b (Fragment) OS=Homo sapiens OX=9606 GN=SEC22B PE=1 SV=1			#VALUE!				#VALUE!
Cytochrome c oxidase subunit 5B, mitochondrial OS=Homo sapiens OX=9606 GN=COX5B PE=1 SV=2			#VALUE!				#VALUE!
Immunoglobulin kappa variable 3-15 OS=Homo sapiens OX=9606 GN=IGKV3-15 PE=1 SV=2	1.959	0.896	1.117	1.359	1.617	1.893	0.529	79.4	155.4	71.1	55.2	89.2	104.4	75
Hexokinase-1 OS=Homo sapiens OX=9606 GN=HK1 PE=1 SV=3	1.01	2.454	0.407				#VALUE!	89.7	90.6	220.2
Nicotinamide N-methyltransferase OS=Homo sapiens OX=9606 GN=NNMT PE=1 SV=1			#VALUE!	1.018	0.691	0.928	1.078				220	152	204.1	224
Isoform of P43243, Matrin-3 OS=Homo sapiens OX=9606 GN=MATR3 PE=1 SV=1			#VALUE!				#VALUE!
HCG2044781 OS=Homo sapiens OX=9606 GN=TMEM189-UBE2V1 PE=3 SV=1			#VALUE!				#VALUE!
NADH dehydrogenase [ubiquinone] 1 alpha subcomplex subunit 5 OS=Homo sapiens OX=9606 GN=NDUFA5 PE=1 SV=3			#VALUE!				#VALUE!
Synaptotagmin-1 OS=Homo sapiens OX=9606 GN=SYT1 PE=1 SV=1			#VALUE!				#VALUE!
Dihydrolipoyllysine-residue succinyltransferase component of 2-oxoglutarate dehydrogenase complex, mitochondrial OS=Homo sapiens OX=9606 GN=DLST PE=1 SV=4	0.935	2.203	0.454	0.997	0.698	0.936	1.069	148.8	139.2	327.8	37	25.8	34.6	36.9
Thiopurine S-methyltransferase OS=Homo sapiens OX=9606 GN=TPMT PE=1 SV=1			#VALUE!				#VALUE!
Isoform of P54920, Alpha-soluble NSF attachment protein (Fragment) OS=Homo sapiens OX=9606 GN=NAPA PE=1 SV=1			#VALUE!				#VALUE!
Isoform of P61960, Ubiquitin-fold modifier 1 (Fragment) OS=Homo sapiens OX=9606 GN=UFM1 PE=1 SV=1			#VALUE!				#VALUE!
Guanine nucleotide-binding protein G(I)/G(S)/G(O) subunit gamma-2 OS=Homo sapiens OX=9606 GN=GNG2 PE=1 SV=2			#VALUE!				#VALUE!
3'(2'),5'-bisphosphate nucleotidase 1 OS=Homo sapiens OX=9606 GN=BPNT1 PE=1 SV=1			#VALUE!				#VALUE!
Glycogen debranching enzyme OS=Homo sapiens OX=9606 GN=AGL PE=1 SV=3			#VALUE!	1.187	2.735	1.522	0.657				124.1	339.5	188.9	147.4
NEDD8-MDP1 readthrough (Fragment) OS=Homo sapiens OX=9606 GN=NEDD8-MDP1 PE=4 SV=1			#VALUE!				#VALUE!
Isoform of P60201, Myelin proteolipid protein (Fragment) OS=Homo sapiens OX=9606 GN=PLP1 PE=1 SV=8	0.997	3.458	0.289				#VALUE!	77.7	77.4	268.7
Surfeit locus protein 4 OS=Homo sapiens OX=9606 GN=SURF4 PE=1 SV=3			#VALUE!				#VALUE!
Stress-induced-phosphoprotein 1 OS=Homo sapiens OX=9606 GN=STIP1 PE=1 SV=1			#VALUE!				#VALUE!
Isoform of P08134, Rho-related GTP-binding protein RhoC (Fragment) OS=Homo sapiens OX=9606 GN=RHOC PE=1 SV=8			#VALUE!	1.238	0.916	1.144	0.874				109.6	100.4	125.4	135.7
Cullin-associated NEDD8-dissociated protein 1 OS=Homo sapiens OX=9606 GN=CAND1 PE=1 SV=2			#VALUE!				#VALUE!
Multifunctional protein ADE2 OS=Homo sapiens OX=9606 GN=PAICS PE=1 SV=3			#VALUE!				#VALUE!
Isoform of P35544, 40S ribosomal protein S30 OS=Homo sapiens OX=9606 GN=FAU PE=1 SV=1			#VALUE!				#VALUE!
Cathepsin Z OS=Homo sapiens OX=9606 GN=CTSZ PE=1 SV=1			#VALUE!	1.469	0.714	0.847	1.181				198.5	141.8	168.1	291.6
Tubulin-specific chaperone A OS=Homo sapiens OX=9606 GN=TBCA PE=1 SV=3			#VALUE!	1.202	2.604	1.298	0.771				131.1	341.3	170.1	157.6
Glutathione synthetase OS=Homo sapiens OX=9606 GN=GSS PE=1 SV=1			#VALUE!	1.115	1.512	1.132	0.883				108.4	163.9	122.7	120.8
Isoform of P05165, Propionyl-CoA carboxylase alpha chain, mitochondrial (Fragment) OS=Homo sapiens OX=9606 GN=PCCA PE=1 SV=1			#VALUE!				#VALUE!
40S ribosomal protein S28 OS=Homo sapiens OX=9606 GN=RPS28 PE=1 SV=1			#VALUE!				#VALUE!
Isoform of P45880, Voltage-dependent anion-selective channel protein 2 (Fragment) OS=Homo sapiens OX=9606 GN=VDAC2 PE=1 SV=1	1.122	1.838	0.544				#VALUE!	67.4	75.6	123.9
Isoform of Q16891, MICOS complex subunit MIC60 (Fragment) OS=Homo sapiens OX=9606 GN=IMMT PE=1 SV=1			#VALUE!	0.99	0.498	0.915	1.093				235.1	117.2	215.1	232.6
Isoform of O76054, SEC14-like 2 (S. cerevisiae), isoform CRA_c OS=Homo sapiens OX=9606 GN=SEC14L2 PE=1 SV=1			#VALUE!	0.998	0.529	0.848	1.18				237.1	125.4	201	236.5
Leukotriene A-4 hydrolase OS=Homo sapiens OX=9606 GN=LTA4H PE=1 SV=2			#VALUE!	1.148	1.215	1.532	0.652				97.9	119	150.1	112.4
Isoform of Q99798, Aconitate hydratase, mitochondrial OS=Homo sapiens OX=9606 GN=ACO2 PE=1 SV=1			#VALUE!				#VALUE!
Marginal zone B- and B1-cell-specific protein OS=Homo sapiens OX=9606 GN=MZB1 PE=1 SV=1			#VALUE!				#VALUE!
Carbonic anhydrase-related protein OS=Homo sapiens OX=9606 GN=CA8 PE=1 SV=3			#VALUE!				#VALUE!
Glutathione reductase, mitochondrial OS=Homo sapiens OX=9606 GN=GSR PE=1 SV=2			#VALUE!	1.241	1.609	1.304	0.767				155.2	249.8	202.4	192.6
Serine/threonine-protein phosphatase 2B catalytic subunit alpha isoform OS=Homo sapiens OX=9606 GN=PPP3CA PE=1 SV=1	1.138	2.462	0.406				#VALUE!	105.6	120.1	259.9
Immunoglobulin kappa variable 2-40 OS=Homo sapiens OX=9606 GN=IGKV2-40 PE=3 SV=2			#VALUE!	1.36	0.943	2.109	0.474				73	68.9	154	99.3
Inter-alpha-trypsin inhibitor heavy chain H1 OS=Homo sapiens OX=9606 GN=ITIH1 PE=1 SV=3			#VALUE!				#VALUE!
Galactose-1-phosphate uridylyltransferase OS=Homo sapiens OX=9606 GN=GALT PE=1 SV=3			#VALUE!	100	100	100	#VALUE!					81.2	170.1	168.6
Cytochrome c oxidase subunit 7A2, mitochondrial OS=Homo sapiens OX=9606 GN=COX7A2 PE=1 SV=1			#VALUE!	1.044	1.572	1.251	0.8				108.1	169.9	135.2	112.9
Cytochrome b-c1 complex subunit 10 OS=Homo sapiens OX=9606 GN=UQCR11 PE=1 SV=1			#VALUE!				#VALUE!
Phytanoyl-CoA dioxygenase, peroxisomal OS=Homo sapiens OX=9606 GN=PHYH PE=1 SV=1			#VALUE!				#VALUE!
Isoform of P01903, HLA class II histocompatibility antigen, DR alpha chain OS=Homo sapiens OX=9606 GN=HLA-DRA PE=1 SV=1			#VALUE!				#VALUE!
Malectin OS=Homo sapiens OX=9606 GN=MLEC PE=1 SV=1			#VALUE!				#VALUE!
ADP-ribosylation factor 6 OS=Homo sapiens OX=9606 GN=ARF6 PE=1 SV=2			#VALUE!				#VALUE!
Isoform of P61247, 40S ribosomal protein S3a (Fragment) OS=Homo sapiens OX=9606 GN=RPS3A PE=1 SV=1	0.905	0.671	1.49				#VALUE!	310.5	281.1	208.4
Endoplasmic reticulum resident protein 44 OS=Homo sapiens OX=9606 GN=ERP44 PE=1 SV=1			#VALUE!	0.989	0.668	1.147	0.872				145.7	97.3	167.1	144.1
Apolipoprotein C-II OS=Homo sapiens OX=9606 GN=APOC2 PE=1 SV=1			#VALUE!				#VALUE!
Isoform of P11413, Glucose-6-phosphate 1-dehydrogenase (Fragment) OS=Homo sapiens OX=9606 GN=G6PD PE=1 SV=1			#VALUE!				#VALUE!
Isoform of P12109, Collagen alpha-1(VI) chain OS=Homo sapiens OX=9606 GN=COL6A1 PE=1 SV=1	1.431	0.741	1.35				#VALUE!	134.1	191.9	99.3
Inorganic pyrophosphatase 2, mitochondrial OS=Homo sapiens OX=9606 GN=PPA2 PE=1 SV=2			#VALUE!	1.28	0.542	1.199	0.834				199	107.8	238.5	254.7
Isoform of P13611, Versican core protein OS=Homo sapiens OX=9606 GN=VCAN PE=1 SV=2			#VALUE!				#VALUE!
40S ribosomal protein S11 OS=Homo sapiens OX=9606 GN=RPS11 PE=1 SV=3	0.879	1.8	0.556				#VALUE!	98.3	86.4	176.9
Isoform of Q02543, 60S ribosomal protein L18a (Fragment) OS=Homo sapiens OX=9606 GN=RPL18A PE=1 SV=1	0.914	0.56	1.786				#VALUE!	323.4	295.5	181.1
Proteasome subunit beta type-8 OS=Homo sapiens OX=9606 GN=PSMB8 PE=1 SV=3			#VALUE!	1.317	0.926	1.213	0.824				179.5	166.3	217.8	236.5
Cytochrome P450 2E1 OS=Homo sapiens OX=9606 GN=CYP2E1 PE=1 SV=1			#VALUE!				#VALUE!
Cytochrome b-c1 complex subunit 1, mitochondrial OS=Homo sapiens OX=9606 GN=UQCRC1 PE=1 SV=3			#VALUE!	1.085	0.44	0.876	1.14				26	11.5	22.8	28.3
Isoform of P46976, Glycogenin 1, isoform CRA_e OS=Homo sapiens OX=9606 GN=GYG1 PE=1 SV=1	1.301	0.998	1.002				#VALUE!	122.1	158.9	121.9
Isoform of P52566, Rho GDP-dissociation inhibitor 2 (Fragment) OS=Homo sapiens OX=9606 GN=ARHGDIB PE=1 SV=1	1.383	0.885	1.13	1.524	1.07	1.33	0.752	79	109.3	69.9	72.1	77.2	95.9	109.9
Isoform of P37059, Estradiol 17-beta-dehydrogenase 2 (Fragment) OS=Homo sapiens OX=9606 GN=HSD17B2 PE=1 SV=1	1.084	0.807	1.242				#VALUE!	7.7	8.3	6.2
Calmodulin regulator protein PCP4 OS=Homo sapiens OX=9606 GN=PCP4 PE=1 SV=3	1.245	2.218	0.451				#VALUE!	179.3	223.1	397.6
Reticulocalbin-1 OS=Homo sapiens OX=9606 GN=RCN1 PE=1 SV=1			#VALUE!				#VALUE!
Kynureninase OS=Homo sapiens OX=9606 GN=KYNU PE=1 SV=1			#VALUE!				#VALUE!
Isoform of Q15233, Non-POU domain-containing octamer-binding protein (Fragment) OS=Homo sapiens OX=9606 GN=NONO PE=1 SV=8			#VALUE!	1.091	0.399	1.116	0.896				102.9	41	114.8	112.2
Bifunctional purine biosynthesis protein PURH OS=Homo sapiens OX=9606 GN=ATIC PE=1 SV=3			#VALUE!				#VALUE!
Isoform of P28845, Corticosteroid 11-beta-dehydrogenase isozyme 1 (Fragment) OS=Homo sapiens OX=9606 GN=HSD11B1 PE=1 SV=6			#VALUE!				#VALUE!
Isoform of P11171, Protein 4.1 (Fragment) OS=Homo sapiens OX=9606 GN=EPB41 PE=1 SV=1			#VALUE!				#VALUE!
Leukocyte elastase inhibitor OS=Homo sapiens OX=9606 GN=SERPINB1 PE=1 SV=1			#VALUE!				#VALUE!
Immunoglobulin heavy constant mu OS=Homo sapiens OX=9606 GN=IGHM PE=1 SV=4			#VALUE!				#VALUE!
Isoform of O95399, Urotensin-2 OS=Homo sapiens OX=9606 GN=UTS2 PE=1 SV=1			#VALUE!	1.164	0.455	1.055	0.948				84.2	38.3	88.8	98
Vesicle-fusing ATPase OS=Homo sapiens OX=9606 GN=NSF PE=1 SV=3	1.21	2.691	0.371				#VALUE!	84.8	102.6	228.3
Purine nucleoside phosphorylase OS=Homo sapiens OX=9606 GN=PNP PE=1 SV=2			#VALUE!	1.353	1.889	1.04	0.962				151.5	286.1	157.5	204.9
Protein TMED7-TICAM2 OS=Homo sapiens OX=9606 GN=TMED7-TICAM2 PE=3 SV=1			#VALUE!	1.121	0.58	1.007	0.993				215.7	125.2	217.3	241.8
NADH dehydrogenase [ubiquinone] 1 alpha subcomplex subunit 6 OS=Homo sapiens OX=9606 GN=NDUFA6 PE=1 SV=3	1.131	3.482	0.287				#VALUE!	89.4	101.1	311.4
Isoform of P46776, 60S ribosomal protein L27a OS=Homo sapiens OX=9606 GN=RPL27A PE=1 SV=1	1.09	1.028	0.974				#VALUE!	106.9	116.4	109.8
Mitochondrial import receptor subunit TOM70 OS=Homo sapiens OX=9606 GN=TOMM70 PE=1 SV=1			#VALUE!	1.046	0.514	1.148	0.874				8.3	4.2	9.5	8.6
Fer-1-like protein 6 OS=Homo sapiens OX=9606 GN=FER1L6 PE=2 SV=2			#VALUE!				#VALUE!
Isoform of Q9UH03, Neuronal-specific septin-3 (Fragment) OS=Homo sapiens OX=9606 GN=SEPT3 PE=1 SV=1	1.054	2.354	0.425				#VALUE!	181.5	191.3	427.2
Isoform of Q96CN7, Isochorismatase domain-containing protein 1 (Fragment) OS=Homo sapiens OX=9606 GN=ISOC1 PE=1 SV=1			#VALUE!				#VALUE!
Alpha-2-macroglobulin receptor-associated protein OS=Homo sapiens OX=9606 GN=LRPAP1 PE=1 SV=1	1.128	1.111	0.9				#VALUE!	247	278.6	274.4
Isoform of P07602, PSAP protein OS=Homo sapiens OX=9606 GN=PSAP PE=1 SV=1			#VALUE!				#VALUE!
Isoform of Q6UW68, Transmembrane protein 205 (Fragment) OS=Homo sapiens OX=9606 GN=TMEM205 PE=1 SV=1			#VALUE!				#VALUE!
DnaJ homolog subfamily C member 5 OS=Homo sapiens OX=9606 GN=DNAJC5 PE=1 SV=1			#VALUE!				#VALUE!
Platelet-activating factor acetylhydrolase IB subunit beta OS=Homo sapiens OX=9606 GN=PAFAH1B2 PE=1 SV=1			#VALUE!				#VALUE!
Isoform of Q96EK6, Glucosamine 6-phosphate N-acetyltransferase (Fragment) OS=Homo sapiens OX=9606 GN=GNPNAT1 PE=1 SV=1			#VALUE!				#VALUE!
Isoform of P61088, Ubiquitin-conjugating enzyme E2 N OS=Homo sapiens OX=9606 GN=UBE2N PE=1 SV=1			#VALUE!				#VALUE!
Isoform of Q14019, Coactosin-like protein OS=Homo sapiens OX=9606 GN=COTL1 PE=1 SV=1	1.059	1.905	0.525				#VALUE!	201.8	213.6	384.5
Isoform of Q9HC38, Glyoxalase domain-containing protein 4 OS=Homo sapiens OX=9606 GN=GLOD4 PE=1 SV=1			#VALUE!				#VALUE!
Transmembrane emp24 domain-containing protein 9 OS=Homo sapiens OX=9606 GN=TMED9 PE=1 SV=2			#VALUE!				#VALUE!
Protein S100-A4 OS=Homo sapiens OX=9606 GN=S100A4 PE=1 SV=1			#VALUE!	1.443	1.177	1.448	0.691				27.9	32.8	40.4	40.2
Isoform of P05166, Propionyl-CoA carboxylase beta chain, mitochondrial OS=Homo sapiens OX=9606 GN=PCCB PE=1 SV=1			#VALUE!				#VALUE!
Immunoglobulin kappa variable 1-6 OS=Homo sapiens OX=9606 GN=IGKV1-6 PE=3 SV=1			#VALUE!				#VALUE!
Isoform of P61353, 60S ribosomal protein L27 (Fragment) OS=Homo sapiens OX=9606 GN=RPL27 PE=1 SV=1			#VALUE!	1.16	0.551	0.978	1.024				47.8	26.4	46.7	55.4
Isoform of P18621, 60S ribosomal protein L17 (Fragment) OS=Homo sapiens OX=9606 GN=RPL17 PE=3 SV=1			#VALUE!				#VALUE!
26S proteasome regulatory subunit 6A OS=Homo sapiens OX=9606 GN=PSMC3 PE=1 SV=3			#VALUE!				#VALUE!
Dihydropteridine reductase OS=Homo sapiens OX=9606 GN=QDPR PE=1 SV=2			#VALUE!	0.994	1.924	0.798	1.254				169.6	326.5	135.3	168.6
Lysosome-associated membrane glycoprotein 1 OS=Homo sapiens OX=9606 GN=LAMP1 PE=1 SV=3	0.99	0.818	1.223	1.058	0.976	1.019	0.981	142.5	141.1	116.5	66.2	64.6	67.5	70
SWISS-PROT:Q3SZ57 (Bos taurus) Alpha-fetoprotein precursor	1.328	0.452	2.213	1.598	1.838	1.344	0.745	136.1	180.8	61.5	59.2	108.8	79.5	94.6
Isoform of O15533, Tapasin OS=Homo sapiens OX=9606 GN=TAPBP PE=1 SV=1			#VALUE!				#VALUE!
Beta-ureidopropionase OS=Homo sapiens OX=9606 GN=UPB1 PE=1 SV=1			#VALUE!	1.027	0.565	0.688	1.453				156	88.1	107.4	160.3
Isoform of O43175, D-3-phosphoglycerate dehydrogenase OS=Homo sapiens OX=9606 GN=PHGDH PE=1 SV=1			#VALUE!				#VALUE!
Isoform of Q9NPH2, Inositol-3-phosphate synthase 1 (Fragment) OS=Homo sapiens OX=9606 GN=ISYNA1 PE=1 SV=8			#VALUE!				#VALUE!
Isoform of O14561, Acyl carrier protein (Fragment) OS=Homo sapiens OX=9606 GN=NDUFAB1 PE=1 SV=1			#VALUE!				#VALUE!
Isoform of P16083, Ribosyldihydronicotinamide dehydrogenase [quinone] OS=Homo sapiens OX=9606 GN=NQO2 PE=1 SV=1			#VALUE!				#VALUE!
Dipeptidyl peptidase 2 OS=Homo sapiens OX=9606 GN=DPP7 PE=1 SV=3			#VALUE!	1.253	0.781	1.026	0.974				197	153.9	202.2	246.8
Cytochrome c oxidase subunit NDUFA4 OS=Homo sapiens OX=9606 GN=NDUFA4 PE=1 SV=1			#VALUE!	0.854	1.751	1.288	0.776				163.5	286.3	210.6	139.6
Isoform of P09455, Retinol-binding protein 1 OS=Homo sapiens OX=9606 GN=RBP1 PE=1 SV=1			#VALUE!	1.3	1.128	1.04	0.962				105.2	118.7	109.4	136.8
Uncharacterized protein (Fragment) OS=Homo sapiens OX=9606 PE=4 SV=2	0.892	0.706	1.418	0.849	1.073	0.853	1.173	118.4	105.6	83.5	87.4	93.7	74.5	74.1
Urocanate hydratase OS=Homo sapiens OX=9606 GN=UROC1 PE=1 SV=1			#VALUE!	0.886	0.337	0.806	1.244				21.4	7.2	17.2	18.9
Estradiol 17-beta-dehydrogenase 11 OS=Homo sapiens OX=9606 GN=HSD17B11 PE=1 SV=3			#VALUE!				#VALUE!
Isoform of O75390, Citrate synthase OS=Homo sapiens OX=9606 GN=CS PE=1 SV=1			#VALUE!				#VALUE!
Myristoylated alanine-rich C-kinase substrate OS=Homo sapiens OX=9606 GN=MARCKS PE=1 SV=4	1.281	5.131	0.195				#VALUE!	72.1	92.3	369.8
S-formylglutathione hydrolase OS=Homo sapiens OX=9606 GN=ESD PE=1 SV=2			#VALUE!	0.841	0.409	0.794	1.26				262.8	107.6	208.6	221
Probable D-lactate dehydrogenase, mitochondrial OS=Homo sapiens OX=9606 GN=LDHD PE=1 SV=1			#VALUE!				#VALUE!
SPRY domain-containing protein 4 OS=Homo sapiens OX=9606 GN=SPRYD4 PE=1 SV=2			#VALUE!				#VALUE!
Isoform of Q96A26, Protein FAM162A OS=Homo sapiens OX=9606 GN=FAM162A PE=1 SV=1			#VALUE!				#VALUE!
Isoform of Q99832, T-complex protein 1 subunit eta (Fragment) OS=Homo sapiens OX=9606 GN=CCT7 PE=1 SV=1	1.156	1.425	0.702	1.096	1.016	0.808	1.237	148.8	172.1	212.1	20.9	21.2	16.9	22.9
Transmembrane glycoprotein NMB OS=Homo sapiens OX=9606 GN=GPNMB PE=1 SV=2			#VALUE!	1.85	1.466	1.251	0.8				78.2	114.6	97.8	144.6
Actin-related protein 3 OS=Homo sapiens OX=9606 GN=ACTR3 PE=1 SV=3			#VALUE!				#VALUE!
Isoform of Q14103, Heterogeneous nuclear ribonucleoprotein D0 (Fragment) OS=Homo sapiens OX=9606 GN=HNRNPD PE=1 SV=8	1.112	1.548	0.646				#VALUE!	218.6	243.1	338.3
Dolichyl-diphosphooligosaccharide--protein glycosyltransferase 48 kDa subunit OS=Homo sapiens OX=9606 GN=DDOST PE=1 SV=4			#VALUE!	1.21	0.589	1.205	0.83				136.4	80.4	164.4	165
Transmembrane emp24 domain-containing protein 10 OS=Homo sapiens OX=9606 GN=TMED10 PE=1 SV=2			#VALUE!				#VALUE!
Isoform of Q12907, Vesicular integral-membrane protein VIP36 (Fragment) OS=Homo sapiens OX=9606 GN=LMAN2 PE=1 SV=1			#VALUE!	1.156	1	1.113	0.899				187.4	187.5	208.5	216.7
Isoform of O43526, Potassium voltage-gated channel subfamily KQT member 2 (Fragment) OS=Homo sapiens OX=9606 GN=KCNQ2 PE=4 SV=1			#VALUE!				#VALUE!
3-oxo-5-beta-steroid 4-dehydrogenase OS=Homo sapiens OX=9606 GN=AKR1D1 PE=1 SV=1			#VALUE!				#VALUE!
Mitochondrial import inner membrane translocase subunit Tim13 OS=Homo sapiens OX=9606 GN=TIMM13 PE=1 SV=1			#VALUE!				#VALUE!
Isoform of Q92599, Septin-8 OS=Homo sapiens OX=9606 GN=SEPT8 PE=1 SV=1	1.257	1.839	0.544				#VALUE!	103.5	130	190.3
Isoform of P00736, Complement C1r subcomponent OS=Homo sapiens OX=9606 GN=C1R PE=1 SV=1			#VALUE!	1.46	0.583	1.071	0.933				194.4	113.4	208.3	283.9
Isoform of P84103, Serine/arginine-rich-splicing factor 3 OS=Homo sapiens OX=9606 GN=SRSF3 PE=1 SV=1	1.332	1.94	0.515				#VALUE!	106.8	142.3	207.2
Membrane primary amine oxidase OS=Homo sapiens OX=9606 GN=AOC3 PE=1 SV=3			#VALUE!				#VALUE!
Methylcrotonoyl-CoA carboxylase beta chain, mitochondrial OS=Homo sapiens OX=9606 GN=MCCC2 PE=1 SV=1			#VALUE!				#VALUE!
Isoform of P52209, 6-phosphogluconate dehydrogenase, decarboxylating (Fragment) OS=Homo sapiens OX=9606 GN=PGD PE=1 SV=1			#VALUE!				#VALUE!
60S ribosomal protein L10a OS=Homo sapiens OX=9606 GN=RPL10A PE=1 SV=2			#VALUE!				#VALUE!
Nicotinate phosphoribosyltransferase OS=Homo sapiens OX=9606 GN=NAPRT PE=1 SV=2	0.774	0.925	1.081				#VALUE!	154.2	119.3	142.6
Isoform of Q969I3, Glycine N-acyltransferase-like protein 1 (Fragment) OS=Homo sapiens OX=9606 GN=GLYATL1 PE=1 SV=1			#VALUE!				#VALUE!
Isoform of Q07020, 60S ribosomal protein L18 (Fragment) OS=Homo sapiens OX=9606 GN=RPL18 PE=1 SV=1			#VALUE!	1.064	0.487	0.638	1.567				250.9	122.1	160.1	266.9
Protein ERGIC-53 OS=Homo sapiens OX=9606 GN=LMAN1 PE=1 SV=2			#VALUE!	1.179	0.554	0.954	1.049				217	120.1	206.9	255.9
Cytochrome b-c1 complex subunit 8 OS=Homo sapiens OX=9606 GN=UQCRQ PE=1 SV=4			#VALUE!	0.793	0.441	0.82	1.219				261.9	115.4	214.8	207.8
Unconventional myosin-XVIIIb OS=Homo sapiens OX=9606 GN=MYO18B PE=1 SV=2			#VALUE!				#VALUE!
40S ribosomal protein S17 OS=Homo sapiens OX=9606 GN=RPS17 PE=1 SV=2			#VALUE!				#VALUE!
Histidine ammonia-lyase OS=Homo sapiens OX=9606 GN=HAL PE=1 SV=1			#VALUE!	0.816	0.477	0.916	1.092				249.3	119	228.4	203.4
Isoform of P18124, 60S ribosomal protein L7 OS=Homo sapiens OX=9606 GN=RPL7 PE=1 SV=1	1.06	0.564	1.773				#VALUE!	178.9	189.7	100.9
Dermcidin OS=Homo sapiens OX=9606 GN=DCD PE=1 SV=2			#VALUE!				#VALUE!
Cytochrome c oxidase subunit 6C OS=Homo sapiens OX=9606 GN=COX6C PE=1 SV=2	1.021	0.596	1.678				#VALUE!	305.7	312.1	182.2
Isoform of Q05193, Dynamin-1 OS=Homo sapiens OX=9606 GN=DNM1 PE=1 SV=1	1.269	2.447	0.409				#VALUE!	64.3	81.6	157.4
Tricarboxylate transport protein, mitochondrial OS=Homo sapiens OX=9606 GN=SLC25A1 PE=1 SV=2			#VALUE!				#VALUE!
Isoform of P07384, Calpain-1 catalytic subunit (Fragment) OS=Homo sapiens OX=9606 GN=CAPN1 PE=1 SV=1	1.056	1.065	0.939	1.186	1.659	1.294	0.772	85.7	90.5	91.3	65.6	108.9	85	77.8
Isoform of O95834, Echinoderm microtubule-associated protein-like 2 OS=Homo sapiens OX=9606 GN=EML2 PE=1 SV=2			#VALUE!				#VALUE!
Glycine N-methyltransferase OS=Homo sapiens OX=9606 GN=GNMT PE=1 SV=3			#VALUE!	1.424	0.906	1.32	0.757				172	155.9	227.1	244.9
Isoform of Q99447, Ethanolamine-phosphate cytidylyltransferase OS=Homo sapiens OX=9606 GN=PCYT2 PE=1 SV=1			#VALUE!	0.861	0.685	0.786	1.272				240.1	164.4	188.7	206.7
Lysosome-associated membrane glycoprotein 2 OS=Homo sapiens OX=9606 GN=LAMP2 PE=1 SV=2			#VALUE!	1.048	0.953	0.88	1.137				206.2	196.4	181.4	216
Ectonucleoside triphosphate diphosphohydrolase 5 OS=Homo sapiens OX=9606 GN=ENTPD5 PE=1 SV=1			#VALUE!	0.762	0.681	0.741	1.349				251.2	171.1	186.2	191.5
Septin-2 OS=Homo sapiens OX=9606 GN=SEPT2 PE=1 SV=1			#VALUE!				#VALUE!
U6 snRNA-associated Sm-like protein LSm3 OS=Homo sapiens OX=9606 GN=LSM3 PE=1 SV=2			#VALUE!				#VALUE!
Fatty acid-binding protein, heart OS=Homo sapiens OX=9606 GN=FABP3 PE=1 SV=4	0.878	1.875	0.533				#VALUE!	131.6	115.5	246.8
Transmembrane emp24 domain-containing protein 5 OS=Homo sapiens OX=9606 GN=TMED5 PE=1 SV=1	1.116	1.065	0.939				#VALUE!	251.5	280.7	267.8
Isoform of O14764, Gamma-aminobutyric acid receptor subunit delta OS=Homo sapiens OX=9606 GN=GABRD PE=3 SV=1	1.049	1.198	0.835				#VALUE!	99.8	104.8	119.5
Isoform of Q9UNI6, Dual-specificity protein phosphatase 12 OS=Homo sapiens OX=9606 GN=DUSP12 PE=1 SV=1			#VALUE!	1.34	1.53	1.413	0.707				151.4	231.7	214	202.9
Isoform of Q9H0R5, Guanylate-binding protein 3 (Fragment) OS=Homo sapiens OX=9606 GN=GBP3 PE=1 SV=1			#VALUE!				#VALUE!
Tetratricopeptide repeat protein 38 OS=Homo sapiens OX=9606 GN=TTC38 PE=1 SV=1			#VALUE!				#VALUE!
Glycine N-acyltransferase OS=Homo sapiens OX=9606 GN=GLYAT PE=1 SV=3			#VALUE!				#VALUE!
Isoform of Q86YB7, Enoyl-CoA hydratase domain-containing protein 2, mitochondrial (Fragment) OS=Homo sapiens OX=9606 GN=ECHDC2 PE=1 SV=1			#VALUE!	1.129	0.543	0.888	1.127				224.8	121.9	199.5	253.8
Contactin-1 OS=Homo sapiens OX=9606 GN=CNTN1 PE=1 SV=1			#VALUE!				#VALUE!
Isoform of Q9HCD6, Protein TANC2 (Fragment) OS=Homo sapiens OX=9606 GN=TANC2 PE=1 SV=1			#VALUE!				#VALUE!
Sulfite oxidase, mitochondrial OS=Homo sapiens OX=9606 GN=SUOX PE=1 SV=2			#VALUE!	1.088	0.717	1.197	0.836				114.1	81.8	136.5	124.1
Isoform of P21757, Macrophage scavenger receptor types I and II (Fragment) OS=Homo sapiens OX=9606 GN=MSR1 PE=1 SV=1			#VALUE!				#VALUE!
Beta-synuclein OS=Homo sapiens OX=9606 GN=SNCB PE=1 SV=1			#VALUE!				#VALUE!
Actin-related protein 2/3 complex subunit 3 OS=Homo sapiens OX=9606 GN=ARPC3 PE=1 SV=3			#VALUE!	1.057	0.52	0.944	1.06				124.4	64.7	117.4	131.5
Isoform of Q8IYT4, Katanin p60 ATPase-containing subunit A-like 2 (Fragment) OS=Homo sapiens OX=9606 GN=KATNAL2 PE=1 SV=1			#VALUE!				#VALUE!
Amphiphysin OS=Homo sapiens OX=9606 GN=AMPH PE=1 SV=1	0.997	2.446	0.409				#VALUE!	180.1	179.5	440.4
60S ribosomal protein L36 OS=Homo sapiens OX=9606 GN=RPL36 PE=1 SV=3			#VALUE!				#VALUE!
S-adenosylhomocysteine hydrolase-like protein 1 OS=Homo sapiens OX=9606 GN=AHCYL1 PE=1 SV=2			#VALUE!	0.875	0.334	0.822	1.217				184.7	61.7	151.8	161.7
Isoform of P21291, Cysteine and glycine-rich protein 1 OS=Homo sapiens OX=9606 GN=CSRP1 PE=1 SV=1	1.173	1.162	0.857				#VALUE!	15.6	18.3	18.2
Isoform of P62917, 60S ribosomal protein L8 (Fragment) OS=Homo sapiens OX=9606 GN=RPL8 PE=1 SV=1			#VALUE!				#VALUE!
Inorganic pyrophosphatase OS=Homo sapiens OX=9606 GN=PPA1 PE=1 SV=2			#VALUE!	0.935	0.529	0.837	1.195				184.6	97.7	154.5	172.6
NAD(P) transhydrogenase, mitochondrial OS=Homo sapiens OX=9606 GN=NNT PE=1 SV=3			#VALUE!	1.202	0.443	0.57	1.753				248.8	110.3	141.9	299
Protein S100-A8 OS=Homo sapiens OX=9606 GN=S100A8 PE=1 SV=1			#VALUE!				#VALUE!
Ubiquitin carboxyl-terminal hydrolase isozyme L3 OS=Homo sapiens OX=9606 GN=UCHL3 PE=1 SV=1			#VALUE!				#VALUE!
Aspartate--tRNA ligase, cytoplasmic OS=Homo sapiens OX=9606 GN=DARS PE=1 SV=2			#VALUE!	0.931	0.465	0.691	1.447				259.1	120.6	179	241.3
Isoform of Q00325, Phosphate carrier protein, mitochondrial OS=Homo sapiens OX=9606 GN=SLC25A3 PE=1 SV=1			#VALUE!	0.823	0.338	0.574	1.743				176.4	59.6	101.2	145.3
Sharpin OS=Homo sapiens OX=9606 GN=SHARPIN PE=1 SV=1			#VALUE!				#VALUE!
Ankyrin repeat domain-containing protein 50 OS=Homo sapiens OX=9606 GN=ANKRD50 PE=1 SV=4			#VALUE!				#VALUE!
Isoform of P24666, Low molecular weight phosphotyrosine protein phosphatase OS=Homo sapiens OX=9606 GN=ACP1 PE=1 SV=1			#VALUE!	1.007	1.179	0.896	1.116				196	231.1	175.6	197.3
Isoform of P01911, HLA class II histocompatibility antigen, DRB1-4 beta chain OS=Homo sapiens OX=9606 GN=HLA-DRB1 PE=1 SV=1	1.064	0.718	1.392				#VALUE!	287.5	305.9	206.6
Putative disintegrin and metalloproteinase domain-containing protein 5 OS=Homo sapiens OX=9606 GN=ADAM5 PE=5 SV=2			#VALUE!				#VALUE!
Ankyrin repeat domain-containing protein 18A OS=Homo sapiens OX=9606 GN=ANKRD18A PE=2 SV=3			#VALUE!				#VALUE!
Phospholysine phosphohistidine inorganic pyrophosphate phosphatase OS=Homo sapiens OX=9606 GN=LHPP PE=1 SV=2			#VALUE!				#VALUE!
WD repeat-containing protein 1 OS=Homo sapiens OX=9606 GN=WDR1 PE=1 SV=4			#VALUE!				#VALUE!
Isoform of Q12912, Lymphoid-restricted membrane protein OS=Homo sapiens OX=9606 GN=LRMP PE=1 SV=1			#VALUE!				#VALUE!
SWISS-PROT:Q9NSB4 Keratin, type II cuticular Hb2 (Hair keratin, type II Hb2) - Homo sapiens (Human).	0.913	0.907	1.103				#VALUE!	164.1	149.8	148.8
Isoform of B3EWF7, Laforin OS=Homo sapiens OX=9606 GN=EPM2A PE=1 SV=2			#VALUE!				#VALUE!
Twinkle protein, mitochondrial OS=Homo sapiens OX=9606 GN=TWNK PE=1 SV=1			#VALUE!				#VALUE!
Isoform of P62910, 60S ribosomal protein L32 (Fragment) OS=Homo sapiens OX=9606 GN=RPL32 PE=1 SV=1			#VALUE!				#VALUE!
Isoform of Q9NYF3, Protein FAM53C (Fragment) OS=Homo sapiens OX=9606 GN=FAM53C PE=1 SV=8			#VALUE!				#VALUE!
Platelet-activating factor acetylhydrolase IB subunit alpha OS=Homo sapiens OX=9606 GN=PAFAH1B1 PE=1 SV=2			#VALUE!				#VALUE!
Prolargin OS=Homo sapiens OX=9606 GN=PRELP PE=1 SV=1			#VALUE!				#VALUE!
Isoform of P62829, 60S ribosomal protein L23 (Fragment) OS=Homo sapiens OX=9606 GN=RPL23 PE=1 SV=1			#VALUE!				#VALUE!
Isoform of P83111, Serine beta-lactamase-like protein LACTB, mitochondrial (Fragment) OS=Homo sapiens OX=9606 GN=LACTB PE=1 SV=1			#VALUE!	1.051	1.476	1.37	0.73				163.3	241.2	223.8	171.7
Protein ABHD14B OS=Homo sapiens OX=9606 GN=ABHD14B PE=1 SV=1	1.317	1.096	0.912				#VALUE!	234.4	308.7	256.9
Vacuolar protein sorting-associated protein 35 OS=Homo sapiens OX=9606 GN=VPS35 PE=1 SV=2			#VALUE!				#VALUE!
Fatty acid-binding protein, epidermal OS=Homo sapiens OX=9606 GN=FABP5 PE=1 SV=3	1.05	2.308	0.433				#VALUE!	90	94.5	207.8
Isoform of Q9H6R6, Palmitoyltransferase OS=Homo sapiens OX=9606 GN=ZDHHC6 PE=1 SV=1			#VALUE!				#VALUE!
Isoform of Q13242, Serine/arginine-rich-splicing factor 9 OS=Homo sapiens OX=9606 GN=SRSF9 PE=1 SV=1			#VALUE!	1.417	0.516	1.219	0.82				192.6	99.5	234.8	273
